# Supplementary material for: Barriers to the uptake of evidence from systematic reviews and meta-analyses: a systematic review of decision makers’ perceptions
Source: PubMed Central journal article supplement — BMJ Open. 2012 Sep 1;2(5):e001220. doi: 10.1136/bmjopen-2012-001220 (PMC3437427; doi:10.1136/bmjopen-2012-001220), 2012-09-01
Supplement: bmjopen-2012-001220.draft_revisions.pdf [file bmjopen-2012-001220.draft_revisions.pdf]

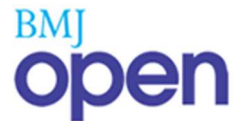

**Barriers to uptake of evidence from systematic reviews and meta-analyses: a systematic review of decision makers' perceptions**

|                                 |                                                                                                                                                                                                                                                                                |
|---------------------------------|--------------------------------------------------------------------------------------------------------------------------------------------------------------------------------------------------------------------------------------------------------------------------------|
| Journal:                        | <i>BMJ Open</i>                                                                                                                                                                                                                                                                |
| Manuscript ID:                  | bmjopen-2012-001220                                                                                                                                                                                                                                                            |
| Article Type:                   | Research                                                                                                                                                                                                                                                                       |
| Date Submitted by the Author:   | 12-Apr-2012                                                                                                                                                                                                                                                                    |
| Complete List of Authors:       | Wallace, John; University of Oxford, DPhil international programme in evidence-based health care<br>Nwosu, Bosah; Royal College of Surgeons in Ireland, First Episode Psychosis Study<br>Clarke, Mike; Queen's University, MRC all-Ireland Hub for Trials Methodology Research |
| <b>Primary Subject Heading</b>: | Evidence based practice                                                                                                                                                                                                                                                        |
| Secondary Subject Heading:      | Medical education and training                                                                                                                                                                                                                                                 |
| Keywords:                       | MEDICAL EDUCATION & TRAINING, QUALITATIVE RESEARCH, Information management < BIOTECHNOLOGY & BIOINFORMATICS, Quality in health care < HEALTH SERVICES ADMINISTRATION & MANAGEMENT                                                                                              |
|                                 |                                                                                                                                                                                                                                                                                |

SCHOLARONE™  
Manuscripts

only

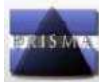

# PRISMA 2009 Checklist

1  
2  
3  
4  
5  
6  
7  
8  
9  
10  
11  
12  
13  
14  
15  
16  
17  
18  
19  
20  
21  
22  
23  
24  
25  
26  
27  
28  
29  
30  
31  
32  
33  
34  
35  
36  
37  
38  
39  
40  
41  
42  
43  
44  
45  
46  
47  
48  
49

| Section/topic                      | #  | Checklist item                                                                                                                                                                                                                                                                                              | Reported on page # |
|------------------------------------|----|-------------------------------------------------------------------------------------------------------------------------------------------------------------------------------------------------------------------------------------------------------------------------------------------------------------|--------------------|
| <b>TITLE</b>                       |    |                                                                                                                                                                                                                                                                                                             |                    |
| Title                              | 1  | Identify the report as a systematic review, meta-analysis, or both.                                                                                                                                                                                                                                         | 1                  |
| <b>ABSTRACT</b>                    |    |                                                                                                                                                                                                                                                                                                             |                    |
| Structured summary                 | 2  | Provide a structured summary including, as applicable: background; objectives; data sources; study eligibility criteria, participants, and interventions; study appraisal and synthesis methods; results; limitations; conclusions and implications of key findings; systematic review registration number. | 1                  |
| <b>INTRODUCTION</b>                |    |                                                                                                                                                                                                                                                                                                             |                    |
| Rationale                          | 3  | Describe the rationale for the review in the context of what is already known.                                                                                                                                                                                                                              | 2                  |
| Objectives                         | 4  | Provide an explicit statement of questions being addressed with reference to participants, interventions, comparisons, outcomes, and study design (PICOS).                                                                                                                                                  | 3                  |
| <b>METHODS</b>                     |    |                                                                                                                                                                                                                                                                                                             |                    |
| Protocol and registration          | 5  | Indicate if a review protocol exists, if and where it can be accessed (e.g., Web address), and, if available, provide registration information including registration number.                                                                                                                               | 22                 |
| Eligibility criteria               | 6  | Specify study characteristics (e.g., PICOS, length of follow-up) and report characteristics (e.g., years considered, language, publication status) used as criteria for eligibility, giving rationale.                                                                                                      | 3                  |
| Information sources                | 7  | Describe all information sources (e.g., databases with dates of coverage, contact with study authors to identify additional studies) in the search and date last searched.                                                                                                                                  | 3                  |
| Search                             | 8  | Present full electronic search strategy for at least one database, including any limits used, such that it could be repeated.                                                                                                                                                                               | 3                  |
| Study selection                    | 9  | State the process for selecting studies (i.e., screening, eligibility, included in systematic review, and, if applicable, included in the meta-analysis).                                                                                                                                                   | 3                  |
| Data collection process            | 10 | Describe method of data extraction from reports (e.g., piloted forms, independently, in duplicate) and any processes for obtaining and confirming data from investigators.                                                                                                                                  | 3                  |
| Data items                         | 11 | List and define all variables for which data were sought (e.g., PICOS, funding sources) and any assumptions and simplifications made.                                                                                                                                                                       | 4                  |
| Risk of bias in individual studies | 12 | Describe methods used for assessing risk of bias of individual studies (including specification of whether this was done at the study or outcome level), and how this information is to be used in any data synthesis.                                                                                      | 4                  |
| Summary measures                   | 13 | State the principal summary measures (e.g., risk ratio, difference in means).                                                                                                                                                                                                                               | 6                  |
| Synthesis of results               | 14 | Describe the methods of handling data and combining results of studies, if done, including measures of consistency (e.g., $I^2$ for each meta-analysis).                                                                                                                                                    | 6                  |

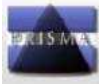

# PRISMA 2009 Checklist

Page 1 of 2

| Section/topic                 | #  | Checklist item                                                                                                                                                                                           | Reported on page # |
|-------------------------------|----|----------------------------------------------------------------------------------------------------------------------------------------------------------------------------------------------------------|--------------------|
| Risk of bias across studies   | 15 | Specify any assessment of risk of bias that may affect the cumulative evidence (e.g., publication bias, selective reporting within studies).                                                             | 6                  |
| Additional analyses           | 16 | Describe methods of additional analyses (e.g., sensitivity or subgroup analyses, meta-regression), if done, indicating which were pre-specified.                                                         | -                  |
| <b>RESULTS</b>                |    |                                                                                                                                                                                                          |                    |
| Study selection               | 17 | Give numbers of studies screened, assessed for eligibility, and included in the review, with reasons for exclusions at each stage, ideally with a flow diagram.                                          | 5                  |
| Study characteristics         | 18 | For each study, present characteristics for which data were extracted (e.g., study size, PICOS, follow-up period) and provide the citations.                                                             | 6                  |
| Risk of bias within studies   | 19 | Present data on risk of bias of each study and, if available, any outcome level assessment (see item 12).                                                                                                | Table 2            |
| Results of individual studies | 20 | For all outcomes considered (benefits or harms), present, for each study: (a) simple summary data for each intervention group (b) effect estimates and confidence intervals, ideally with a forest plot. | Table 3            |
| Synthesis of results          | 21 | Present results of each meta-analysis done, including confidence intervals and measures of consistency.                                                                                                  | 6                  |
| Risk of bias across studies   | 22 | Present results of any assessment of risk of bias across studies (see Item 15).                                                                                                                          | 6                  |
| Additional analysis           | 23 | Give results of additional analyses, if done (e.g., sensitivity or subgroup analyses, meta-regression [see Item 16]).                                                                                    | -                  |
| <b>DISCUSSION</b>             |    |                                                                                                                                                                                                          |                    |
| Summary of evidence           | 24 | Summarize the main findings including the strength of evidence for each main outcome; consider their relevance to key groups (e.g., healthcare providers, users, and policy makers).                     | 8                  |
| Limitations                   | 25 | Discuss limitations at study and outcome level (e.g., risk of bias), and at review-level (e.g., incomplete retrieval of identified research, reporting bias).                                            | 9                  |
| Conclusions                   | 26 | Provide a general interpretation of the results in the context of other evidence, and implications for future research.                                                                                  | 9                  |
| <b>FUNDING</b>                |    |                                                                                                                                                                                                          |                    |
| Funding                       | 27 | Describe sources of funding for the systematic review and other support (e.g., supply of data); role of funders for the systematic review.                                                               | 13                 |

From: Moher D, Liberati A, Tetzlaff J, Altman DG, The PRISMA Group (2009). Preferred Reporting Items for Systematic Reviews and Meta-Analyses: The PRISMA Statement. PLoS Med 6(6): e1000097. doi:10.1371/journal.pmed1000097

For more information, visit: [www.prisma-statement.org](http://www.prisma-statement.org).

Page 2 of 2

For peer review only - <http://bmjopen.bmj.com/site/about/guidelines.xhtml>

## Barriers to uptake of evidence from systematic reviews and meta-analyses: a systematic review of decision makers' perceptions

**Authors:** John Wallace, Bosah Nwosu, and Mike Clarke

### ABSTRACT

**Objective:** To review the barriers to the uptake of research evidence from systematic reviews by decision makers.

**Search strategy:** We searched 19 databases covering the full range of publication years, utilised three search engines, and also personally contacted investigators. Reference lists of primary studies and related reviews were also consulted.

**Selection criteria:** Studies were included if they reported on the views and perceptions of decision makers on the uptake of evidence from systematic reviews, meta-analyses, and the databases associated with them. All study designs, settings, and decision makers were included. One investigator screened titles to identify candidate articles then two reviewers independently assessed the quality and the relevance of retrieved reports.

**Data extraction:** Two reviewers described the methods of included studies and extracted data that were summarised in tables and then analysed. Using a pre-established taxonomy, the barriers were organized into a framework according to their effect on knowledge, attitudes, or behaviour.

**Results:** Of 1,726 articles initially identified, we selected 27 unique published studies describing at least 1 barrier to the uptake of evidence from overviews. These studies included a total of 25 surveys and 2 qualitative studies. Overall, the majority of participants (n=10,218) were physicians (64%). The most commonly investigated barriers were lack of use (14/25), lack of awareness (12/25), lack of access (11/25), lack of familiarity (7/25), lack of usefulness (7/25), lack of motivation (4/25), and external barriers (5/25).

**Conclusion:** This systematic review reveals that interventions to foster uptake of evidence from reviews and meta-analyses will need to address a broad range of factors. Our review offers a differential diagnosis for why decision makers, especially physicians, do not use systematic reviews, as well as a rational approach towards improving their uptake and also a framework for future research.

### INTRODUCTION

Many researchers are sceptical about the extent to which research is used.<sup>1</sup> One of the most common findings from health research is the failure to routinely translate research findings into daily practice. Studies can't guarantee the use of their results. While facts do not speak for themselves, studies can increase the likelihood of their use. Bridging the knowledge-to-practice gap entails multiple challenges and the process involves an evaluation of the many barriers to change.<sup>2</sup>

The communication of clinically important research findings is hampered by the volume and geometric growth of the medical literature. Systematic reviews address this problem. A

1  
2  
3 systematic review is a review of a clearly formulated question that uses systematic and  
4 explicit methods to identify, select and critically appraise relevant research, and to collect and  
5 analyse data from studies that are included in the review.<sup>3</sup> The contribution of systematic  
6 reviews is captured by a number of online databases such as The Cochrane Library.  
7

8  
9 Evidence synthesis that interprets the results of individual studies within the context of global  
10 evidence should be considered the basic unit of knowledge translation.<sup>4</sup> Synthesis should  
11 inform policy briefs, patient decision aids, clinical practice guidelines and clinical decision  
12 making. Failure to optimally use results from systematic reviews can lead to healthcare  
13 inefficiencies and reduced quality and quantity of life.  
14

15  
16 But the existence of systematic reviews does not ensure their dissemination and application to  
17 clinical practice and policy making. Evidence from systematic reviews has not been widely  
18 adopted by healthcare professionals.<sup>4</sup> A review of physicians' information-seeking behaviour  
19 found that textbooks are still the most frequently used source of information, followed by  
20 advice from colleagues.<sup>5</sup>  
21

22  
23 While many investigations have been conducted on the barriers to the uptake of research  
24 evidence in general, little is known specifically about the determinants of uptake of  
25 systematic review evidence in particular. In the past, there have been reviews of the barriers  
26 to adherence to clinical guidelines,<sup>6</sup> of the barriers to the appropriate use of research evidence  
27 in policy decisions,<sup>1</sup> of the barriers and facilitators to implementing shared decision-making,<sup>7</sup>  
28 of the barriers to improving the usefulness of systematic reviews for health care managers  
29 and policy makers<sup>8</sup> and lastly, of the barriers and incentives to optimal health care.<sup>9</sup> Here we  
30 set out to identify the barriers to uptake of evidence specifically from systematic reviews,  
31 meta-analyses and the databases that contain them, focusing on all decision makers including  
32 physicians. Such knowledge can help developers of systematic reviews, researchers and  
33 clinicians design effective interventions to improve the uptake of systematic reviews and  
34 meta-analyses.  
35

## 36 **Methods**

### 37 *Search strategy*

38  
39 We conducted a systematic review of the literature to identify barriers to evidence uptake  
40 from integrative reviews and meta-analyses. The primary researcher (JW) searched 19  
41 databases and used 3 search engines, for articles, not limited to the English language,  
42 covering the full range of publication years available in each database up to Dec 2010 using a  
43 combination of index terms and text words derived from relevant articles previously  
44 identified. The databases included the Cochrane Library, TRIP, Joanna Biggs I.N.G, N. G.  
45 Clearing House, Health Evidence, PubMed (1950-2010), EMBASE (1980-2010), ERIC,  
46 CINAHL, PsycInfo, OpenSigle, Index to Theses in Great Britain and Ireland, and Conference  
47 Papers Index. Campbell Collaboration, Canadian Health Services Research Foundation,  
48 EPOC, KT+, McMaster University, Keenan Research Centre, and the New York Academy  
49 of Medicine. The search engines ALTA VISTA and Google scholar were also utilised.  
50 References from included primary studies and related review articles were scanned, experts  
51 in the field contacted, and bibliographies of textbooks were reviewed. The following search  
52 terms were included: obstacle, barrier, impede, utilisation, uptake, systematic review and  
53 meta-analysis.  
54  
55

56  
57 We repeated parts of the search for the period December 2010 to February 2012 in order to  
58 identify any potentially relevant or on-going studies to be listed under 'Studies awaiting  
59  
60

1  
2  
3 classification' or 'On-going studies' to be used in a later update of this review. We applied  
4 the same search strategies to PubMed and EMBASE, the two most productive databases in  
5 terms of reports already identified for inclusion in the review.  
6

### 7 *Selection criteria*

8 We included studies if they were an original collection of data. Studies containing interviews,  
9 focus groups and surveys with all decision makers were eligible. We did not restrict our  
10 search to the inclusion of studies reporting as their main objective the assessment of barriers  
11 specifically to systematic review uptake. No study design or language was excluded. Studies  
12 were included if they addressed perceived barriers to uptake of evidence specifically from  
13 systematic reviews, meta-analyses and the databases that contained them such as The  
14 Cochrane Library, The Cochrane Database of Systematic Reviews, Database of Abstracts of  
15 Reviews of Effectiveness, Cochrane Pregnancy and Childbirth Database, Oxford Database of  
16 Perinatal Trials, and the Reproductive Health Library. All decision makers were included.  
17  
18

19  
20 A barrier was defined as any factor that limits or restricts complete uptake of evidence from  
21 overviews. We focused on factors that could be changed by intervention, rather than age or  
22 sex of participants.<sup>6</sup> In many of the articles, respondents indicated barriers via response to  
23 survey questions. For qualitative studies, major themes from focus groups or interviews  
24 identified barriers.  
25

26 We reported studies that included usable data. Care was also taken to identify studies that  
27 produced multiple publications.<sup>10</sup> When more than one publication described a single study  
28 and each presented the same data, only the most recent publication was included. However, if  
29 more than one publication described a single study but each presented new and  
30 complementary data, both were included.  
31  
32

### 33 *Data collection and analysis*

34 Articles were retrieved if it appeared likely that they contained empirical data regarding  
35 barriers to uptake of evidence from systematic reviews. The first reviewer reviewed all the  
36 citations, and followed up reference lists, while the retrieved full articles were assessed by at  
37 least two reviewers (JW and BN) for inclusion in the review. Disagreements were resolved  
38 by discussion. If this were not possible, provision was made for adjudication by a third party.  
39 Studies that appeared relevant, but which were not, were included in a list of excluded studies  
40 maintained by the author (JW).  
41  
42

43 Two investigators (JW and BN) extracted data from the included studies using a data  
44 collection form. The following information was extracted from each article: description of the  
45 barriers, the percentage of respondents describing the barrier, demographics of the  
46 respondents, and study characteristics. If possible, we calculated the percentages of  
47 respondents affected by a barrier as the difference between 100% and the sum of the  
48 percentage with no opinion and those not affected.<sup>6</sup> A data extraction sheet was created based  
49 on a taxonomy of barriers to implementing clinical guidelines in actual practice.<sup>6</sup> This  
50 taxonomy had been used successfully elsewhere and has been compared well to other  
51 taxonomies.<sup>7</sup>  
52  
53

54 Both reviewers independently read each publication and identified the unit of text relevant to  
55 each of the main outcomes of interest. During the process, barriers were aggregated into  
56 themes and ordered according to the number of studies in which they were identified. All  
57 themes were organised into groups based on whether they affected knowledge, attitude, or  
58  
59  
60



behaviour.<sup>6</sup> The categories are based on a model that describes an ideal, general mechanism of the knowledge, attitudes, behaviour framework.<sup>11</sup> Lack of familiarity and lack of awareness were grouped under the knowledge heading; lack of outcome expectancy, self-efficacy, and lack of motivation were grouped under attitudes; patient, review and environmental factors were grouped under behaviour.

Before a systematic review can affect patient outcome, it first affects knowledge, then attitudes, and finally, behaviour. Factors limiting uptake through a cognitive component were considered barriers affecting knowledge. If an affective component was involved then the barrier was regarded as affecting attitude. A restriction on ability was considered a barrier affecting behaviour. Lack of familiarity included the inability to correctly answer questions about overview content, as well as self-reported lack of familiarity. Lack of awareness was defined as the inability to correctly acknowledge systematic review existence.

Study characteristics were abstracted and included in Table 1. Methods were outlined in Table 2; the results were tabulated in Table 3.

For purposes of quality assessment, study characteristics were extracted: country of origin, year of publication, main objective of the study, design of the study, characteristics of participants, sampling strategy, response rate, and methodological approach, including data collection strategies.

## RESULTS

### Search yield

Of 19 databases searched and three search engines utilized, there were 1,726 specific candidate articles found possibly examining barriers to uptake of evidence from systematic reviews. Some 1,651 titles were excluded after examination of the bibliographic citation. After examination of the full text of 75 articles, 13 articles fulfilled the criteria. Fifteen primary studies were detected from the reference lists of these 75 articles. A total of 28 detected reports describing 27 unique studies met inclusion criteria. A search of EMBASE and PubMed from January 2011 to February 2012, failed to detect any relevant, completed or on-going studies to be added to 'Studies awaiting classification' and 'On-going studies' tables.

The 27 included studies encompassed 2 qualitative studies, and 25 surveys asking a total of 57 questions regarding possible barriers to uptake of evidence from systematic reviews, meta-analysis, and the databases containing them. A survey was defined as at least one question to a group of decisions makers about barriers to uptake of evidence from systematic reviews. Barriers were grouped into themes: 18 derived from the surveys and an additional 10 from the qualitative studies.

**Figure 1. PRISMA Flow diagram**

|                                                     |                                            |
|-----------------------------------------------------|--------------------------------------------|
| 1,726 records identified through database searching | 8 records identified through other sources |
| 1,734 records screened                              |                                            |
| 1,659 records excluded                              |                                            |

75 full-text articles assessed  
for eligibility

62 full-text articles excluded  
because they did not address  
systematic reviews/meta-analyses  
or perceived barriers

13 studies fulfilled the criteria  
15 studies identified from reference lists of 75 articles

1 duplicate study detected

therefore 27 studies included in the synthesis

The studies were undertaken in the UK (n=9), Canada (n=5), Australia (n=4), USA (n=3), Ireland (n=1), Holland (n=1), New Zealand (n=1), Switzerland (n=1), India (n=1), and SE Asia: Indonesia, Malaysia, Thailand, the Philippines (n=1). One country, Switzerland, surveyed participants from 78 countries. Therefore, included studies reported data from decision makers in 91 countries. Of 10,218 participants, 64% were physicians. Seventeen studies (63%) were published after the year 2000.

### Comprehensiveness of Surveys

How often surveys considered the full variety of barriers to uptake was investigated. Theoretically, a survey could examine up to 7 different types of barrier.<sup>6</sup> Of the 25 surveys, 8 (31%) examined only one type of barrier, and the average number examined was 1.7. Of the remaining surveys, five (19%) examined 2 barriers, eight (31%) examined 3, four (15%) examined 4, and one (4%) study examined 5 barriers. None of the surveys examined 6 or more barriers.

### Study Methods

The included studies were limited in terms of the quality and generalizability of their results. While all but one<sup>12</sup> had a well-described sampling frame, just eight of the 27 studies describe selecting a random sample of participants (Table 2). Response rates were not mentioned in two of the 27 studies (Table 2). The response rate was variable. The rate varied from 8.8% to 100% and 17 of the 27 studies describe a response rate of at least 60% (Table 2). Twenty-six studies reported the number of participants investigated, with the number varying from 16 to 1,406.

Most studies were surveys (n=25), 2 were qualitative studies with one included study using mixed methods. Data collection strategies included focus groups (n=1), individual interviews (n=1), together with mail, telephone, and web-based questionnaires (n=25).

### Characteristics of Surveys



1  
2  
3 The characteristics of each study are outlined in Table 1. We found that the surveys used a  
4 heterogeneous variety of decision-making populations, based on location or speciality. They  
5 also investigated a number of review resources. The surveys looked at systematic reviews,  
6 meta-analyses, The Cochrane Library, Cochrane Database of Systematic Reviews, Database  
7 of Abstracts of Reviews of Effectiveness, the Reproductive Health Library, also the earlier  
8 Cochrane Pregnancy and Childbirth Database and the Oxford Database of Perinatal Trials.  
9

10  
11 The surveys displayed a wide range of the percentage of respondents reporting each barrier  
12 (Table 3).  
13

### 14 **Type of barriers**

15 After classifying possible barriers into common themes, it was found that the 57 questions  
16 about obstacles to uptake of evidence from systematic reviews encompassed 28 barriers. The  
17 barriers affected knowledge (lack of awareness, lack of familiarity); attitudes (lack of  
18 confidence, lack of ability, lack of perceived usefulness, lack of motivation); and behaviour  
19 (review factors, environmental factors).  
20

### 21 **Barriers Identified by Studies**

22  
23  
24 **Lack of awareness:** Eleven studies measured lack of awareness as a possible barrier.  
25 Sample size ranged from 248 to 8,100 (median, 475) and the response rate ranged from 8.8%  
26 to 90% (median, 66%). The sample size and response rate were not reported in one study.<sup>13</sup>  
27 The percentage of respondents reporting lack of awareness as a barrier was as high as 82%  
28 (for DARE<sup>14</sup>) and as low as 1% (for Cochrane Library<sup>15</sup>) with a median of 55%. In 9 (82%)  
29 of the 11 studies, at least 10% of the respondents cited lack of awareness as a barrier.  
30

31  
32 **Lack of Familiarity:** Seven surveys measured lack of familiarity as a possible barrier.  
33 Sample size ranged from 60 to 8,100 (median, 531) and the response rate ranged from 8.8%  
34 to 100% (median, 63%). The percentage of respondents suggesting lack of familiarity as a  
35 barrier was as high as 98% (DARE<sup>14</sup>) and as low as 19% (systematic reviews<sup>14</sup>) with a  
36 median of 70%. In 7 (100%) of the 7 surveys, at least 10% of the respondents cited lack of  
37 familiarity as a barrier.  
38

39  
40 **Lack of access:** Eleven surveys measured lack of access as a possible barrier. Sample size  
41 ranged from 60 to 3,087 (median, 440), and the response rate ranged from 44% to 100%  
42 (median, 71%). The sample size and response were not reported in one study.<sup>13</sup> The  
43 percentage of respondents identifying lack of access as a barrier was as high as 95% (lack of  
44 easy access to Cochrane Library<sup>16</sup>) and as low as 3% (lack of access to Cochrane Library<sup>17</sup>),  
45 with a median of 55%. In 10 (91%) of the 11 surveys, at least 10% of the respondents cited  
46 lack of access as a barrier.  
47

48  
49 **Lack of motivation:** Four studies measured lack of motivation as a possible barrier. Sample  
50 size ranged from 98 to 8,100 (median, 1,305). The percentage of respondents identifying this  
51 barrier was as high as 10% (Oxford Database of Perinatal Trials<sup>18</sup>) and as low as 2% (meta-  
52 analysis<sup>19</sup>) with a median of 3.6%. In none of the surveys did more than 10% of respondents  
53 report lack of motivation as a barrier.  
54

55  
56 **Lack of usefulness:** Seven surveys measured lack of perceived usefulness as a possible  
57 barrier. Sample size ranged from 60 to 491 (median, 350), and the response rate ranged from  
58 63% to 100% (median, 87%). The sample size and response rate were not reported in 1 of the  
59  
60

1  
2  
3 studies.<sup>13</sup> The percentage of respondents identifying lack of usefulness as a barrier was as  
4 high as 95% (systematic reviews<sup>14</sup>) and as low as 7% (Cochrane Library<sup>15</sup>) with a median of  
5 16.5%. In six of the seven surveys, at least 10% of the respondents cited lack of usefulness as  
6 an issue.  
7

8  
9 **External barriers:** Five studies investigated 10 external barriers to overview uptake. The  
10 external barriers investigated were environment-related in 5 studies and also systematic  
11 review-related in one study, with no patient-related barriers cited. More than 10% of  
12 respondents cited lack of resources and lack of positive policy climate<sup>20</sup>, lack of workshop  
13 attendance<sup>13</sup>, and lack of training in Cochrane Library use<sup>15, 17</sup> as possible environmental  
14 barriers. Lack of time was not cited by more than 10%.<sup>15</sup> More than 10% of respondents  
15 cited the limited range of topics covered by the Cochrane Library<sup>15</sup> as a possible overview  
16 barrier.  
17

18  
19 **Lack of use:** Fourteen surveys looked at lack of use of systematic reviews. Sample size  
20 ranged from 150 to 8,100 (median, 490) and the response rate ranged from 8.8% to 100%  
21 (median, 63%). The percentage of respondents reporting lack of use was as high as 99%  
22 (DARE<sup>14</sup>) and as low as 18% (Cochrane Library<sup>13</sup>) with a median of 78%. In 14 (100%) of  
23 the 14 surveys at least 10% of the respondents did not use overviews or the databases  
24 containing them.  
25

### 26 **Qualitative studies**

27 Two qualitative studies<sup>21, 22</sup> cited six important barriers to evidence uptake from systematic  
28 reviews. The two studies emphasised lack of accessibility. They also cited a lack of training  
29 in the purpose and methodology of systematic reviews as a barrier to uptake. Content issues  
30 such as lack of relevance, lack of implications for practice, and lack of implementation  
31 strategies were also cited. A deficient understanding of the information needs of the target  
32 audience of systematic reviews was also raised as a major barrier.  
33  
34

35 One study had a qualitative element exploring the perceived weaknesses of the Cochrane  
36 Library.<sup>15</sup> Participants suggested as barriers the limited range of topics and clinical areas  
37 covered, poor access, the narrow focus on RCTs and meta-analysis, difficulty of use, lack of  
38 regular update, poor promotion, and the time required to use and search the database.  
39  
40

### 41 **COMMENT**

42 Uptake of evidence from systematic reviews is crucial in translating pre-appraised evidence  
43 into practice. However, a variety of barriers undermine this process. Quantification of themes  
44 allows exploration of variation between studies. Lack of awareness and lack of familiarity  
45 affect stakeholder's knowledge of systematic reviews. In terms of attitudes, lack of outcome  
46 expectancy in terms of trust, usefulness and confidence are also potential barriers. Despite  
47 adequate knowledge and attitudes, external barriers can affect a person's ability to use  
48 reviews and meta-analyses.  
49  
50

### 51 **Barriers to Systematic Review Uptake**

52  
53 **Lack of Awareness:** Although many overview resources, such as The Cochrane Library,  
54 have achieved widespread awareness, in 82% of studies more than 10% of the respondents  
55 cited lack of awareness of systematic reviews or the databases that contained them, as a  
56 barrier to uptake.  
57  
58  
59  
60

1  
2  
3 **Lack of familiarity:** Casual awareness does not guarantee familiarity with systematic  
4 reviews or the ability to use them. Of the 25 surveys that measured awareness or familiarity,  
5 only 4 (14%) of the surveys measured both awareness and familiarity. Lack of familiarity  
6 was more common than lack of awareness of some databases containing systematic  
7 reviews.<sup>14</sup>  
8

9  
10 **Lack of access:** Accessible databases are an essential resource. Access impacts on awareness  
11 and familiarity. The percentage of respondents identifying lack of access as a barrier was as  
12 low as 3% (lack of access to Cochrane Library<sup>17</sup>). Clearly access is improving. However, in  
13 10 (91%) of the 11 surveys, at least 10% of the respondents still cited lack of access as a  
14 barrier.  
15

16 **Lack of Motivation:** Decision makers may not be able to overcome the inertia of previous  
17 practice and they may lack the motivation to use evidence from systematic reviews. This  
18 barrier has not been as widely investigated as others. Only four studies measured lack of  
19 motivation as a possible barrier. In none of the surveys did more than 10% of respondents  
20 report lack of motivation as a barrier. This is in contrast to the results of the Cabana study  
21 that indicated that lack of motivation is a significant barrier to adherence to clinical practice  
22 guidelines.<sup>6</sup>  
23  
24

25 **Lack of usefulness:** Seven surveys measured lack of perceived usefulness as a possible  
26 barrier. The percentage of respondents identifying lack of usefulness as a barrier was as high  
27 as 95% (systematic reviews<sup>14</sup>) and as low as 7% (Cochrane Library<sup>15</sup>) with a median of  
28 16.5%. In all of the seven surveys addressing this issue, at least 10% of the respondents cited  
29 perceived lack of usefulness as a problem. More than 10% of some participants did not find  
30 The Cochrane Library useful for informing clinical decision making, guiding research, and  
31 finding references.<sup>15</sup>  
32  
33

34 **External barriers:** Appropriate knowledge and attitudes are necessary but not sufficient for  
35 uptake of evidence from systematic reviews. There may be review, patient, or environmental  
36 barriers that eventually can affect motivation to use this form of evidence. Content issues  
37 such as lack of relevance, lack of implications for practice, lack of implementation  
38 strategies<sup>22</sup> and the limited range of topics covered<sup>15</sup> in systematic reviews can be barriers.  
39 No patient-related barriers, such as inability to reconcile patient preferences with review  
40 evidence, were highlighted. More than 10% of respondents cited lack of resources<sup>20</sup>, lack of  
41 appropriate policy climate<sup>20</sup>, and lack of training in systematic review or database searching<sup>17</sup>  
42 as possible environmental barriers. Interestingly, lack of time did not emerge as a major  
43 barrier.  
44  
45

46 **Lack of use:** The practical usage of systematic reviews should lead to improved knowledge  
47 and attitudes to this form of pre-appraised evidence. However, in all of the 14 surveys that  
48 looked at this issue, at least 10% of the respondents did not use overviews or the databases  
49 containing them, with the percentage of respondents reporting lack of use as high as 99%.<sup>14</sup>  
50  
51

## 52 **Limitations**

53 The strengths of this study include an extensive and systematic literature search. Explicit  
54 inclusion criteria and a transparent approach to collecting and presenting data from the  
55 included studies were also used. Every included study was appraised by at least two of the  
56 authors. The limitations of our review largely reflect the limitations of the literature reviewed.  
57  
58  
59  
60

1  
2  
3 All the 27 included studies, except the two qualitative studies, were surveys using closed-  
4 ended questions with the barriers addressed dependent on investigator selection. A fear of  
5 being outside a consensus for instance, was not specifically investigated as a barrier. It is also  
6 possible that a different taxonomy used to content-analyse the data may have modified our  
7 results. But the taxonomy used here compares well to others.<sup>23</sup>  
8

9  
10 Because much of the research in the social sciences is poorly indexed in electronic databases,  
11 relevant studies may have been missed. Searching the reference lists of related studies  
12 yielded additional studies and we did show that some barriers were consistent across a large  
13 number of reports.  
14

15 Another defect of the investigation is the use of participant self-ratings rather than objective,  
16 criterion-based assessments. The surveys depend on decision maker's perceptions and views.  
17 The primary studies were not an audit of actual practice. Self-rating can overestimate the  
18 actual understanding of terms such as 'meta-analysis' and the possibility of social-desirability  
19 bias needs to be considered. Whether an obstacle is real or perceived may affect the type of  
20 intervention needed to overcome the barrier.  
21  
22

23 Some of the included studies were limited with respect to sampling and generalizability.  
24 Some surveys were small and used non-random samples confined to specific groups,  
25 inhibiting the extent to which the results can be generalised.<sup>24</sup> A well-described sampling  
26 frame and a good response rate are important.<sup>25</sup> A low response rate in some of the surveys  
27 increases the potential for selection bias. A poor response means that the external validity of  
28 the studies can be questioned as it increases the impact of non-responder bias in the survey  
29 results.<sup>26</sup> However, by including all types of decision makers our systematic review allows a  
30 better understanding of how health-care system variation impacts on review uptake.  
31  
32

### 33 ***Implications***

34 This analysis offers a differential diagnosis of why decision makers may be reluctant to use  
35 systematic reviews. A number of the barriers already cited by Cabana and colleagues<sup>6</sup> to  
36 guideline adherence were identified, though time constraints as a barrier were not identified  
37 often. The results of this review have a number of implications for systematic review uptake  
38 in particular and research uptake in general.  
39

40 Despite the high regard in which systematic reviews and The Cochrane Library are held,  
41 there are a variety of barriers to systematic review uptake, which include lack of awareness,  
42 lack of familiarity, lack of access, lack of perceived usefulness, limited actual use in practice  
43 and finally, a number of external barriers to do with systematic review content, presentation,  
44 and wider organisational factors. Few studies however, consider the full variety of barriers  
45 that must be overcome to achieve enhanced uptake. Some 27 studies were identified  
46 containing 25 surveys investigating systematic reviews. Of the 25 surveys, 8 (31%) examined  
47 only one type of barrier, and the average number of barriers examined was 1.7. By not  
48 considering the full variety of barriers, interventions to improve use are less likely to address  
49 all the important factors impacting on systematic review uptake and, as a result, are less  
50 likely to be successful. Future research needs to address a fuller range of obstacles. However,  
51 given the diversity of the included studies, the range of decision makers interviewed and the  
52 context in which they worked, it is striking that some factors were identified as frequently as  
53 they were.  
54  
55  
56  
57  
58  
59  
60

1  
2  
3 Clinical guidelines represent a well-accepted tool for acquiring pre-appraised evidence.  
4 However, awareness of other common evidence-based resources, such as systematic reviews  
5 and the databases containing them, appear to be limited and the self-reported understanding  
6 of related concepts reflected a potential deficit in the ability of many decision makers to  
7 critically appraise the literature.<sup>19</sup> More emphasis on promoting an enhanced understanding  
8 of review concepts and terminology is required.  
9

10  
11 Access to The Cochrane Library is crucial to support the scientific paradigm now advocated  
12 in healthcare.<sup>27</sup> Connectivity appears to have increased<sup>17</sup> but access and use of evidence  
13 databases can be improved. Even different professionals working in the same clinical setting  
14 can have different levels of access to the same database, a topic meriting further  
15 investigation.<sup>17</sup> We also need to enhance awareness, familiarity and understanding of  
16 systematic reviews. Strategies to assist those least likely to use Cochrane databases may help  
17 our collective efforts towards evidence-based practice.<sup>25</sup> If most of those who have access to  
18 the database then go on to actually use the Cochrane Library then access may be an  
19 important, addressable issue.  
20

21  
22 Respondents who perceived the reviews as being easy to use were three times more likely to  
23 use the reviews than those who did not.<sup>28</sup> Respondents who expected to use a systematic  
24 review in the future were much more likely to have used a systematic review in the past.<sup>28</sup> So  
25 not using systematic reviews and not perceiving them as easy to use, are significant barriers  
26 to their practical use.  
27

### 28 **Conclusion**

29  
30 It has been suggested that strategies to promote change in clinical practice are more likely to  
31 be successful if based on an analysis of barriers and facilitators specific to the context.<sup>29</sup> To  
32 our knowledge, this study represents the first systematic review of a large group of decision  
33 makers on barriers to the uptake of evidence from systematic reviews, meta-analyses and  
34 their related databases. This study attempted to pull together the views of 10,218 decision  
35 makers from 91 countries, of whom 64% were physicians. From the 27 primary studies  
36 included in this systematic review, it is apparent that the barriers exist across continents and  
37 disciplines.<sup>30</sup>  
38

39  
40 The findings here have immediate and practical relevance for organisations such as  
41 universities, government agencies, and speciality colleges that are trying to improve access to  
42 the best available evidence and promote its use. These findings provide a useful foundation  
43 on which to plan future interventions to enhance the uptake of evidence from systematic  
44 reviews among physicians, leading to improved care for the individual patient.  
45

### 46 **References**

- 47  
48  
49 1. Innvaer S, Vist G, Trommald M et al. Health policy-makers' perceptions of their use of  
50 evidence: a systematic review. *Journal of Health Services Research & Policy* 2002; 7 (4):  
51 239–244.  
52  
53 2. Straus S, Tetroe J, and Graham I. Knowledge to action: what it is and what it isn't. In  
54 Straus S, Tetroe J, and Graham I, editors. *Knowledge Translation in Health Care*. UK: Wiley-  
55 Blackwell, BMJ Books; 2009.  
56  
57  
58  
59  
60



- 1  
2  
3 3. Sackett D, Rosenberg WC, Muir Gray JA, Haynes R B, and Richardson WS. Evidence  
4 based medicine: what it is and what it isn't. *BMJ* 1996; 312: 71.
- 5  
6 4. Tetzlaff J, Tricco A, and Moher D. Knowledge Synthesis. In Straus S, Tetroe J, Graham I  
7 D, editors. *Knowledge translation in health care*. UK: Wiley-Blackwell, BMJ Books; 2009.
- 8  
9 5. Dawes M, Sampson U. Knowledge management in clinical practice: a systematic review of  
10 information seeking behavior in physicians. *Int J Med Infor* 2003; 71(1):9-15.
- 11  
12 6. Cabana M, Rand CS, Powe NR et al. Why don't physicians follow clinical practice  
13 guidelines? A framework for improvement. *JAMA* 1999; 282(15):1458-1465.
- 14  
15 7. Gravel, K., Legare, F., Graham, I. Barriers and facilitators to implementing shared  
16 decision-making in clinical practice: a systematic review of health care professionals.  
17 *Implementation science* 2006; 1:16.
- 18  
19 8. Lavis J, Davies H, Oxman A et al. Toward systematic reviews that inform health care  
20 management. *Journal of Health Services Research & Policy* 2005; 10 Suppl 1: 35–48.
- 21  
22 9. Cochrane L J, Olson C A, Murray S et al. Gaps between knowing and doing:  
23 Understanding and assessing the barriers to optimal health care. *Journal of Continuing*  
24 *Education in the Health Professions* 2007; 27: 94–102.
- 25  
26 10. Lang T. and Secic M. *How to report statistics in medicine*. Philadelphia: ACP; 2006.
- 27  
28 11. Woolf SH. Practice guidelines: a new reality in medicine, III: impact on patient care.  
29 *Arch Intern Med*. 1993;153: 2646-2655.
- 30  
31 12. Young J. and Ward J. Evidence-based medicine in general practice: beliefs and barriers  
32 among Australian GPs. *Journal of Evaluation in Clinical Practice* 2001; 7 (2): 201-210.
- 33  
34 13. Martis R, Ho J, Crowther C. Survey of knowledge and perception on the access to  
35 evidence-based practice and clinical practice change among maternal and infant health  
36 practitioners in South East Asia. *BMC Pregnancy and Childbirth* 2008; 8:34.
- 37  
38 14. McColl A, Smith H, White P, et al. General practitioner's perceptions of the route to  
39 evidence based medicine: a questionnaire survey. *British Medical Journal* 1998; 316: 361 -  
40 365.
- 41  
42 15. Wilson P, Watt I and Hardman, P. Survey of medical directors' views and use of the  
43 Cochrane Library. *British Journal of Clinical Governance* 2001; 6(1): 34-39.
- 44  
45 16. Wilson P, Droogan J, Glanville J, Watt I, Hardman G. Access to the evidence base from  
46 general practice: a survey of general practice staff in Northern and Yorkshire Region. *Quality*  
47 *in Health Care* 2001;10:83–89.
- 48  
49 17. Wilson P, Glanville J, Watt I. Access to the online evidence base in general practice: a  
50 survey of the Northern and Yorkshire Region. *Health Information and Libraries Journal*  
51 *2003;20:172-178*.
- 52  
53  
54  
55  
56  
57  
58  
59  
60



- 1  
2  
3  
4 18. Paterson-Brown S, Fisk N, Wyatt J. Uptake of meta-analytical overviews of effective  
5 care in English obstetric units. *Journal of Obstetrics and Gynaecology* 1995; 102: 297-301.  
6  
7  
8 19. Sur R, Scales Jr C, Preminger G, Dahm P. Evidence-based medicine: a survey of  
9 american urological association members. *Journal of Urology* 2006; 176: 1127-1134.  
10  
11 20. Ciliska D, Hayward S, Dobbins M, Brunton G, Underwood J. Transferring public-health  
12 nursing research to health-system planning: assessing the relevance and accessibility of  
13 systematic reviews. *Canadian Journal of Nursing Research* 1999; 31(1): 23-36.  
14  
15 21. Dobbins M, DeCorby K, and Twiddy T. A knowledge transfer strategy for public health  
16 decision makers. *Worldviews on Evidence-Based Nursing* 2004; 1(2): 120-128.  
17  
18 22. Dobbins M, Jack S, Thomas H, Kothari A. Public health decision-makers'  
19 informational needs and preferences for receiving information. *Worldviews on Evidence-*  
20 *based Nursing* 2007; 4(3): 156-163.  
21  
22 23. Espeland A, Baerheim A. Factors affecting general practitioners' decisions about plain  
23 radiography for back pain: implications for classification of guideline barriers – a qualitative  
24 study. *BMC Health Serv Res* 2003; 3:8.  
25  
26 24. Bennett S, Tooth L, McKenna K, Rodger S, Strong J, Ziviani J, et al. Perceptions of  
27 evidence-based practice: a survey of Australian occupational therapists. *Australian*  
28 *Occupational Therapy Journal* 2003;50, 13-22.  
29  
30 25. Kerse N, Arroll B, Lloyd T, Young J, Ward J. Evidence databases, the Internet, and  
31 general practitioners: the New Zealand story. 2001; *N Z Med J* 114;1127:89-91.  
32  
33 26. Dahm P, Poolman R, Bhandari M et al. 2009. Perceptions and Competence in Evidence-  
34 Based Medicine: A Survey of the American Urological Association Membership. *Journal of*  
35 *Urology* 2009; 18 (2): 767-77.  
36  
37 27. Young, J. and Ward, J. General practitioner's use of evidence databases. *MJA*. 1999;170:  
38 56-58.  
39  
40 28. Dobbins, M, Cockerill, R, Barnsley, J. and Ciliska, D. Factors of the innovation,  
41 organisation, environment, and individual that predict the influence five systematic reviews  
42 had on public health decisions. *International Journal of Technology Assessment in Health*  
43 *Care* 2001;17:4: 467-478.  
44  
45 29. Grol R, Grimshaw J. Evidence-based implementation of evidence-based medicine. *Jt*  
46 *Comm J Qual Improv* 1999 Oct; 25(10):503-13.  
47  
48 30. Melnyk B, Fineout-Overholt E, Feinstein N et al. Nurses' Perceived Knowledge, Beliefs  
49 Skills and Needs Regarding Evidence-Based Practice: Implications for accelerating the  
50 paradigm shift. *Worldviews on Evidence-based Nursing* 2004; 1(3): 185-93.  
51  
52  
53  
54  
55  
56  
57  
58  
59  
60

- 1  
2  
3 31. Prescott K, Lloyd M, Douglas H-R, Haines A, Humphrey C, Rosenthal J and Watt I.  
4 Promoting clinically effective practice: general practitioners' awareness of sources of  
5 research evidence. *Family Practice* 1997; 14:320-323.  
6  
7 32. Jordans C, Hawe P, Irwig L et al. Use of systematic reviews of randomized trials by  
8 Australian neonatologists and obstetricians. *MJA* 1998;168: 267-270.  
9  
10 33. Olatunbosun, O, Edouard L, Pierson R A. Physician's attitudes toward evidence-based  
11 obstetric practice: a questionnaire survey. *BMJ* 1998 Jan; 316:31.  
12  
13 34. Gavgani V. and Mohan V. Physicians' Attitude towards Evidence-Based Medical  
14 Practice and Health Science Library Services. *LIBRES Library and Information Science*  
15 *Research Electronic Journal* 2008;18 (1).  
16  
17 35. Hanson B, Bhandari M, Audige L, Helfet D. The need for education in evidence-based  
18 orthopaedics. *Acta Orthop Scand* 2004;75 (3):328-332.  
19  
20 36. Poolman R, Sierevelt I, Farrokhyar F et al. Perceptions and competence in evidence-  
21 based medicine: are surgeons getting better? *J Bone Joint Surg Am* 2007;89:206-215.  
22  
23 37. McAlister FA, Graham I, Karr G, Laupacis A. Evidence-based medicine and the  
24 practicing clinician. *J Gen Intern Med* 1999;14:236-242.  
25  
26 38. McCaw B, McGlade K, McElnay J. The impact of the internet on the practice of general  
27 practitioners and community pharmacists in Northern Ireland. *Informatics in primary care*  
28 2007;15:231-7.  
29  
30 39. Carey S, Hall D. Psychiatrists' views of evidence-based practice. *Psychiatric Bulletin*  
31 1999; 23:159-161.  
32  
33 40. Lawrie SM, Scott AIF, Sharpe MC. Evidence-based psychiatry – Do psychiatrists want it  
34 and can they do it? *Health Bulletin* 2000 Jan;58:1.  
35  
36 41. Ciliska D, Hayward S, Dobbins M, Brunton G, Underwood J. Transferring public health  
37 nursing research to health service planning: assessing the relevance and accessibility of  
38 systematic reviews. *Can J Nurs Research* 1999; 31(1):23-36.  
39  
40 42. Hyde C. Who uses the Cochrane Pregnancy and Childbirth Database? *BMJ* 1995;  
41 29:310.  
42  
43  
44  
45  
46

#### 47 **Competing interests**

48 All authors declare that they have no conflicting interests.  
49

50  
51 All authors have completed the Unified Competing Interest form and declare: no support  
52 from any organisation for the submitted work; no financial relationships with any  
53 organisations that might have an interest in the submitted work in the previous three years, no  
54 other relationships or activities that could appear to have influenced the submitted work.  
55

56 The Corresponding Author has the right to grant on behalf of all authors and does grant on  
57 behalf of all authors, an exclusive licence (or non-exclusive for government employees) on a  
58  
59  
60

worldwide basis to the BMJ Publishing Group Ltd and its Licensees to permit this article (if accepted) to be published in BMJ editions and any other BMJ PGL products and sublicences to exploit all subsidiary rights, as set out in our licence

**Table 1 Characteristics of included studies**

| Year Published, Country                                                            | Objective                                                                                                   | Design                             | Participants                                                        | Date Conducted |
|------------------------------------------------------------------------------------|-------------------------------------------------------------------------------------------------------------|------------------------------------|---------------------------------------------------------------------|----------------|
| 1.<br>Wilson, P.<br>Watt, I.<br>and<br>Hardman, P.<br>2001(15)<br>UK               | To determine attitudes on the importance of effectiveness information                                       | Postal questionnaire               | 338<br>Medical directors                                            | 1999           |
| 2.<br>Paterson<br>-Brown<br>et al<br>1995 (18)<br>UK                               | To establish the availability of meta-analytic overviews and to find out how obstetricians keep up to date. | Telephone Survey                   | 98<br>Obstetricians                                                 | 1993           |
| 3.<br>Hanson,<br>Bhandari,<br>Audige, .<br>and Helfet,<br>2004 (35)<br>Switzerland | To determine current understanding of study methodology and critical appraisal.                             | Questionnaire<br>Self-administered | 532<br>Surgeons<br>and<br>allied professionals<br>from 78 countries | 2002           |
| 4.<br>Poolman<br>et al.<br>2007 (36)<br>Holland                                    | They examinedb perceptions and competence in EBM                                                            | Postal survey                      | 366<br>Orthopedic<br>Surgeons                                       | 2005           |
| 5.<br>Sur<br>et al.<br>2005 (19)<br>USA                                            | Investigated the attitudes of urologists toward EBM                                                         | Web-based survey                   | 714<br>Urologists                                                   | 2005           |
| 6.<br>Dahn<br>et al.                                                               | To investigate the attitudes of urologists                                                                  | Mail survey                        | 889<br>Urologists                                                   | 2006           |

|                                                                   |                                                                                    |                                                    |                                                   |           |  |
|-------------------------------------------------------------------|------------------------------------------------------------------------------------|----------------------------------------------------|---------------------------------------------------|-----------|--|
| 2009(26)<br>USA                                                   | to EBM                                                                             |                                                    |                                                   |           |  |
| <b>7.</b><br>McAlister<br>et al.<br>1999 )<br>Canada              | To assess the<br>attitudes of<br>general internists<br>to EBM.                     | Postal Survey                                      | 294<br>Physicians                                 | 1997      |  |
| <b>8.</b><br>Wilson<br>et al<br>2001(16)<br>UK                    | To identify current<br>methods of making<br>research evidence<br>accessible        | Postal survey                                      | 1406<br>General<br>practitioners                  | 1999      |  |
| <b>9.</b><br>Young, J<br>and<br>Ward, J.<br>2001(12)<br>Australia | Examine<br>views<br>about<br>EBM                                                   | Postal Survey and<br>Semi-structured<br>Interviews | 60<br>GPs                                         | 1999      |  |
| <b>10.</b><br>McCaw<br>et al<br>2007(38)<br>Ireland               | Gain an insight<br>into the use of<br>Internet                                     | Postal survey                                      | 542<br>Community<br>pharmacist (178)<br>GPs (364) | 2005      |  |
| <b>11.</b><br>Kerse, N<br>et al.<br>2001(25)<br>NZ                | Access to<br>Internet<br>and<br>Cochrane<br>Library                                | Cross-sectional<br>postal and fax<br>survey        | 381<br>GPs                                        | 1999-2000 |  |
| <b>12.</b><br>McColl<br>et al.<br>1998(14)<br>UK                  | To determine the<br>attitude to EBM<br>and perceived<br>usefulness of<br>databases | Postal questionnaire                               | 302<br>GP principals                              | 1997      |  |
| <b>13.</b><br>Bennett                                             | To find out about                                                                  | Postal questionnaire                               | 649                                               | 2000      |  |

|                                                                                                                                                                                                                                                                                                                                                             |                                                 |                                                                                                                                                         |                                                      |                                                                |      |
|-------------------------------------------------------------------------------------------------------------------------------------------------------------------------------------------------------------------------------------------------------------------------------------------------------------------------------------------------------------|-------------------------------------------------|---------------------------------------------------------------------------------------------------------------------------------------------------------|------------------------------------------------------|----------------------------------------------------------------|------|
| 1<br>2<br>3<br>4<br>5<br>6<br>7<br>8<br>9<br>10<br>11<br>12<br>13<br>14<br>15<br>16<br>17<br>18<br>19<br>20<br>21<br>22<br>23<br>24<br>25<br>26<br>27<br>28<br>29<br>30<br>31<br>32<br>33<br>34<br>35<br>36<br>37<br>38<br>39<br>40<br>41<br>42<br>43<br>44<br>45<br>46<br>47<br>48<br>49<br>50<br>51<br>52<br>53<br>54<br>55<br>56<br>57<br>58<br>59<br>60 | et al.<br>2003(24)<br>Australia                 | attitudes to EBP<br>and implementation<br>barriers                                                                                                      |                                                      | Occupational<br>Therapists                                     |      |
| <b>14.</b>                                                                                                                                                                                                                                                                                                                                                  | Young<br>and Ward<br>1999(27)<br>Australia      | To determine awareness<br>and use of the Cochrane<br>Library and access<br>to the<br>Internet                                                           | Postal<br>Questionnaire                              | 311<br>General practitioners                                   | 1997 |
| <b>15.</b>                                                                                                                                                                                                                                                                                                                                                  | Prescott<br>et al.<br>1997(31)<br>UK            | To establish the<br>awareness of<br>research evidence                                                                                                   | Self-administered,<br>postal questionnaire<br>survey | 800<br>GPs                                                     | 1996 |
| <b>16.</b>                                                                                                                                                                                                                                                                                                                                                  | Jordans<br>et al.<br>1998(32)<br>Australia      | To determine the<br>proportion who<br>report using<br>systematic reviews                                                                                | Cross-sectional<br>telephone survey                  | 224<br>neonatologists<br>obstetricians                         | 1995 |
| <b>17.</b>                                                                                                                                                                                                                                                                                                                                                  | Ciliska,<br>et al.<br>1999(41)<br>Canada        | To gain an<br>understanding of<br>research needs,<br>perceptions of barriers<br>to research utilisation,<br>and attitudes towards<br>systematic reviews | Telephone<br>questionnaire<br>survey                 | 226<br>decision makers<br>in public health<br>Included doctors | NK   |
| <b>18.</b>                                                                                                                                                                                                                                                                                                                                                  | Olatunbosun<br>et al.<br>1998(33)<br>Canada     | To examine<br>views of<br>EBM                                                                                                                           | Self-administered,<br>Two-page<br>questionnaire      | 190 physicians<br>in obstetric practice                        | 1996 |
| <b>19.</b>                                                                                                                                                                                                                                                                                                                                                  | Melnyk<br>et al.<br>2004(30)<br>USA             | Describe major<br>barriers<br>and facilitators<br>to EBP.                                                                                               | Limited survey                                       | 160 nurses                                                     | 2003 |
| <b>20.</b>                                                                                                                                                                                                                                                                                                                                                  | Gavvani, V.<br>and Mohan,<br>2008(34)<br>India. | Directed at<br>exploring attitudes<br>towards<br>EBM                                                                                                    | Survey method                                        | 98<br>physicians                                               | 2008 |

|     |                                          |                                                                                                                |                                |                                                              |            |
|-----|------------------------------------------|----------------------------------------------------------------------------------------------------------------|--------------------------------|--------------------------------------------------------------|------------|
| 21. | Wilson,<br>et al.<br>2003(17)<br>UK      | To assess the<br>awareness and<br>use of NHSnet                                                                | Postal survey<br>questionnaire | 1364<br>GPs: 441<br>Nurses: 325<br>Practice<br>Managers: 556 | 2001       |
| 22. | Carey,<br>et al.<br>1999(39)<br>UK       | To determine the<br>attitudes of towards<br>the practice of EBM                                                | Postal<br>questionnaire        | 139<br>psychiatrists                                         | 1998       |
| 23. | Lawrie<br>et<br>al.<br>2000(40)<br>UK    | To examine<br>attitudes to evidence<br>- based psychiatry                                                      | survey<br>postal               | 93<br>senior<br>psychiatrists                                | NK         |
| 24. | Hyde<br>et<br>al.<br>1995(42)<br>UK      | To examine use<br>of Cochrane<br>Pregnancy and<br>Childbirth Database                                          | postal survey                  | 274 subscribers<br>to CPCD<br>included<br>doctors            | 1994       |
| 25. | Martis<br>et<br>al.<br>2008(13)<br>Asia  | The aim was<br>to assess current<br>knowledge of<br>evidence-based<br>practice                                 | survey<br>postal               | 660 health care<br>professionals<br>including<br>doctors     | 2005       |
| 26. | Dobbins,<br>et al.<br>2007(22)<br>Canada | The purpose was<br>to identify<br>preferences<br>for the transfer<br>and exchange<br>of research<br>knowledge. | Semi-structured<br>interviews  | 16<br>decision-makers<br>included<br>a doctor                | 2001       |
| 27. | Dobbins,<br>et al.                       | To discover public<br>health decision                                                                          | One-hour<br>focus groups       | 46<br>Policy makers                                          | 2002- 2003 |



|                    |                                                                                                 |                     |
|--------------------|-------------------------------------------------------------------------------------------------|---------------------|
| 2004(21)<br>Canada | makers' preferences<br>for content,<br>format, and channels for<br>receiving research knowledge | included<br>doctors |
|--------------------|-------------------------------------------------------------------------------------------------|---------------------|

| <b>Study</b>                                          | <b>Sample frame</b>                                                          | <b>Response rate</b> | <b>Measurement of use of evidence</b> |
|-------------------------------------------------------|------------------------------------------------------------------------------|----------------------|---------------------------------------|
| <b>1.</b><br>Wilson<br>et<br>al.<br>2001(15)          | Purposive<br>sample of<br>491 Medical directors<br>Well-described<br>sample  | (69%)<br>338/491     | Reported use                          |
| <b>2.</b><br>Paterson<br>-Brown<br>et al.<br>1995(18) | Purposive<br>sample of<br>98 obstetricians<br>Well-described<br>sample       | (100%)<br>98/98      | Reported<br>use                       |
| <b>3.</b><br>Hanson<br>et<br>al.<br>2004(35)          | Purposive<br>sample of<br>1,064 surgeons/others<br>Well-described<br>sample  | (50%)<br>532/1,064   | Reported<br>use                       |
| <b>4.</b><br>Poolman<br>et<br>al.<br>2007(36)         | Purposive<br>sample of<br>611 orthopaedic surgeons<br>Well-described         | (60%)<br>366/611     | Reported<br>use                       |
| <b>5.</b><br>Sur<br>et<br>al.<br>2006(19)             | Purposive<br>sample of<br>8,100 urologists<br>Well-described<br>sample frame | (8.8%)<br>714/8,100  | Reported use                          |
| <b>6.</b><br>Dahm<br>et<br>al.<br>2009(26)            | Random<br>sample of<br>2000 urologists<br>Well-described<br>sample frame     | (45%)<br>889/2000    | Reported use                          |
| <b>7.</b><br>McAlister                                | Purposive                                                                    | (59%)                | Reported use                          |

|                                                          |                                    |                                                                                |                      |              |
|----------------------------------------------------------|------------------------------------|--------------------------------------------------------------------------------|----------------------|--------------|
| 1<br>2<br>3<br>4<br>5<br>6<br>7<br>8<br>9                | et al. 1999(37)                    | sample of 294 general Physicians. Well-described sample frame                  | 294/521              |              |
| 10<br>11<br>12<br>13<br>14<br>15<br>16<br>17<br>18<br>19 | <b>8.</b> Wilson et al. 2001(16)   | Purposive sample of 3,087 individuals Well-described sample frame Primary care | (45%)<br>1,406/3,087 | Reported use |
| 20<br>21<br>22<br>23<br>24<br>25<br>26<br>27             | <b>9.</b> Young, and Ward 2001(12) | Sample of, 60 GPs Sampling frame not described                                 | (100%)<br>60/60      | Reported use |
| 28<br>29<br>30<br>31<br>32<br>33                         | <b>10.</b> McCaw et al. 2007(38)   | Sample of 1081 GPs and 522 pharmacists Well-described sample frame             | (34%)<br>542/1603    | Reported use |
| 34<br>35<br>36<br>37<br>38<br>39<br>40<br>41<br>42<br>43 | <b>11.</b> Kerse et al. 2001(25)   | Random Sample of 459 GPs Well-described sample frame                           | (83%)<br>381/459     | Reported use |
| 44<br>45<br>46<br>47<br>48<br>49<br>50<br>51             | <b>12.</b> McColl et al. 1998(14)  | Random Sample of 452 GPs Well-described sample frame                           | (63%)<br>302/452     | Reported use |
| 52<br>53<br>54<br>55<br>56<br>57<br>58<br>59<br>60       | <b>13.</b> Bennett et al. 2003(24) | Proportional random sample of 1491 occupational therapists                     | (44%)<br>649/1491    | Reported use |

|                                    |                                                                                    |                    |              |
|------------------------------------|------------------------------------------------------------------------------------|--------------------|--------------|
|                                    | Well-described sampling frame                                                      |                    |              |
| 14.<br>Young and Ward, 1999(27)    | Random sample of 428 GPs<br>Well-described sampling frame                          | (73%)<br>311/428   | Reported use |
| 15.<br>Prescott et al. 1997 (31)   | Random sample of 800 GPs                                                           | (62%)<br>501/800   | Reported use |
|                                    | Well-described sample frame                                                        |                    |              |
| 16.<br>Jordans et al. 1998(32)     | Random sample of 145 Obstetricians and 104 neonatologists<br>Well described Sample | (90%)<br>224/248   | Reported use |
| 17.<br>Ciliska et al. 1999(41)     | 277 who met inclusion criteria of decision makers<br>Well-described sample         | (87%)<br>242/277   | Reported use |
| 18.<br>Olatunbosun et al. 1998(33) | Random sample of 190 family physicians and obstetricians<br>Well-described sample  | (76%)<br>148/190   | Reported use |
| 19.<br>Melnyk et al. 2004(30)      | 'Convenient' sample<br>Well described sample                                       | (100%)<br>160/1600 | Reported use |
| 20.<br>Gavvani And                 | Random sample                                                                      | (65%)<br>98/150    | Reported use |

|    |            |                     |                       |              |
|----|------------|---------------------|-----------------------|--------------|
| 1  |            |                     |                       |              |
| 2  |            |                     |                       |              |
| 3  | Mohan,     | Well-described      |                       |              |
| 4  | 2008(34)   | sample              |                       |              |
| 5  |            |                     |                       |              |
| 6  | <b>21.</b> |                     |                       |              |
| 7  | Wilson     | All GPs in          | (44%)                 | Reported use |
| 8  | et         | defined area.       | 1364/3090             |              |
| 9  | al.        | Well-described      |                       |              |
| 10 | 2003 (17)  | sample              |                       |              |
| 11 |            |                     |                       |              |
| 12 |            |                     |                       |              |
| 13 | <b>22.</b> |                     |                       |              |
| 14 | Carey      | All psychiatrists   | (64%)                 | Reported use |
| 15 | and        | in a defined area   | 139/216               |              |
| 16 | Hall,      | Well-defined sample |                       |              |
| 17 | 1999(39)   |                     |                       |              |
| 18 |            |                     |                       |              |
| 19 |            |                     |                       |              |
| 20 | <b>23.</b> |                     |                       |              |
| 21 | Lawrie     | All in a            | (76%)                 | Reported use |
| 22 | et         | defined area        | 93/123                |              |
| 23 | al.        | Well-described      | but just 22/123 (17%) |              |
| 24 | 2000(40)   | sample              | contributed           |              |
| 25 |            |                     | to this review        |              |
| 26 |            |                     |                       |              |
| 27 | <b>24.</b> |                     |                       |              |
| 28 | Hyde       | All subscribers     | 71%                   | Reported use |
| 29 | et         | to CPCD             | 274/387               |              |
| 30 | al.        | Well-described      |                       |              |
| 31 | 1995(42)   | sample              |                       |              |
| 32 |            |                     |                       |              |
| 33 |            |                     |                       |              |
| 34 |            |                     |                       |              |
| 35 | <b>25.</b> |                     |                       |              |
| 36 | Martis     | All in a            | NK                    | Reported use |
| 37 | et         | defined area        |                       |              |
| 38 | al.        | Well-described      |                       |              |
| 39 | 2008(13)   | sample              |                       |              |
| 40 |            |                     |                       |              |
| 41 |            |                     |                       |              |
| 42 |            |                     |                       |              |
| 43 | <b>26.</b> |                     |                       |              |
| 44 | Dobbins    | Purposeful          | 46/60 (77%)           | Reported use |
| 45 | et         | sample              |                       |              |
| 46 | al.        | Well-described      |                       |              |
| 47 | 2004(21)   | sample              |                       |              |
| 48 |            |                     |                       |              |
| 49 |            |                     |                       |              |
| 50 |            |                     |                       |              |
| 51 |            |                     |                       |              |
| 52 | <b>27.</b> |                     |                       |              |
| 53 | Dobbins    | Purposeful          | 16/NK                 | Reported use |
| 54 | et         | sample              |                       |              |
| 55 | al         | Well-described      |                       |              |
| 56 | 2007(22)   | sample              |                       |              |
| 57 |            |                     |                       |              |
| 58 |            |                     |                       |              |
| 59 |            |                     |                       |              |
| 60 |            |                     |                       |              |

**Table 3. Barrier Descriptive Findings**

| Barrier category            | Barrier Descriptive                                                                                                                                                                                                                                                                                                                                                                                                                                                                                                                                                                                      |
|-----------------------------|----------------------------------------------------------------------------------------------------------------------------------------------------------------------------------------------------------------------------------------------------------------------------------------------------------------------------------------------------------------------------------------------------------------------------------------------------------------------------------------------------------------------------------------------------------------------------------------------------------|
| <i>Knowledge barriers</i>   | Eleven studies measured lack of awareness as a possible barrier. The percentage of respondents reporting lack of awareness as a barrier was as high as 82% and as low as 1%, with a median of 55%. Eleven surveys measured lack of access as a possible barrier. The percentage of respondents identifying lack of access as a barrier was as high as 95% and as low as 3%, with a median of 55%. Seven surveys measured lack of familiarity as a possible barrier. The percentage of respondents suggesting lack of familiarity as a barrier was as high as 98 and as low as 19%, with a median of 70%. |
| <i>Attitudinal barriers</i> | Seven surveys measured lack of perceived usefulness as a possible barrier. The percentage of respondents identifying lack of usefulness as a barrier was as high as 95% and as low as 7%, with a median of 16.5%. Four studies measured lack of motivation as a possible barrier. The percentage of respondents identifying this barrier was as high as 10% and as low as 2% with a median of 3.6%.                                                                                                                                                                                                      |
| <i>Behaviour barriers</i>   | Five studies investigated 10 external barriers to overview uptake. More than 10% of respondents cited lack of resources, lack of positive policy climate, lack of workshop attendance, and lack of training as possible environmental barriers. Fourteen surveys looked at lack of use of overviews. The percentage of respondents reporting lack of use was as high as 99% and as low as 18% with a median of 78%.                                                                                                                                                                                      |

## PROTOCOL

### Barriers to uptake of evidence from systematic reviews and meta-analyses: a systematic review of decision makers' perceptions

**Authors:** John Wallace, Bosah Nwosu, and Mike Clarke

#### Abstract

This is the protocol for a systematic review. The objectives are as follows:

1. To review all studies identifying barriers to uptake of evidence from systematic reviews, meta-analyses and the databases associated with them.
2. To assess the methodological quality of these studies.
3. To perform a systematic review of the evidence in this area.

#### Background

The slow and haphazard process of translating research findings into clinical practice compromises the potential benefits of clinical research. The need for effective knowledge

1  
2  
3 transfer in clinical practice is essential. However, to date, there is a consensus among the  
4 research community that most efforts in knowledge translation at a clinical level have met  
5 with little success.<sup>1</sup>  
6

7  
8 A systematic review is a review of a clearly formulated question that uses systematic and  
9 explicit methods to identify, select and critically appraise relevant research, and to collect and  
10 analyse data from studies that are included in the review.<sup>2</sup> The increased uptake of evidence  
11 from systematic reviews is advocated because of their potential to improve the quality of  
12 decision making for patient care. Systematic reviews can do this by decreasing inappropriate  
13 clinical variation and quickly expediting the application of current, effective advances to  
14 everyday practice. However, research suggests that evidence from systematic reviews has not  
15 been widely adopted by health professionals. Increasing uptake of systematic reviews and  
16 improving awareness of the advantages that the technique can bring to the field of healthcare  
17 is a major challenge.  
18

19  
20 Barriers are factors that limit or restrict uptake of research evidence in clinical practice.<sup>3</sup>  
21 Implementation researchers, educators, policy makers, and clinicians want to know the  
22 identity of barriers to knowledge use in healthcare contexts and also how to address them.  
23 There are specific challenges associated with the assessment of barriers. Many lessons have  
24 been learned from previous research in this area on how to address barriers to knowledge use.  
25 Cabana and colleagues identified a variety of barriers to physician adherence to clinical  
26 practice guidelines and they organised the barriers in terms of their impact on knowledge,  
27 attitudes, and physician behaviour.<sup>3</sup>  
28

29  
30 **Context:** Despite wide promulgation, systematic reviews have had limited effect on changing  
31 decision makers' behaviour. Little is known about the process and factors inhibiting the  
32 uptake of knowledge in response to exposure to a systematic review.  
33

34 **Objective:** To identify barriers to evidence uptake from systematic reviews, meta-analyses,  
35 and their associated databases.  
36

### 37 **Search methods for identification of studies**

38 The Cochrane Library, Medline, Embase, PsycInfo, and other electronic resources, nineteen  
39 in total, will be searched, with a special emphasis on grey literature and knowledge  
40 translation research. The reference lists from primary studies identified will be searched and  
41 also the references from related overviews. The reviewers will identify additional candidate  
42 articles by reviewing the bibliographies of articles retrieved from the search. Experts in the  
43 field will be contacted. Terms to be used will include systematic reviews, overviews, meta-  
44 analysis, and reviews. Other search terms utilised will be barriers, obstacles, impairments,  
45 knowledge translation, knowledge uptake, knowledge utilisation, and decision making.  
46  
47

### 48 **Data collection and analysis**

49 Articles will be included that examined at least one barrier to knowledge uptake from  
50 systematic reviews, meta-analyses, or the databases that contain them. A barrier will be  
51 defined as any factor that limits or restricts complete knowledge uptake from an overview. It  
52 is proposed to focus on barriers that could be changed by an intervention rather than age or  
53 gender. Respondents can identify barriers via responses to survey questions. For qualitative  
54 studies, major themes from focus groups or interviews could also identify barriers. All  
55 decision makers will be included.  
56  
57  
58  
59  
60



1  
2  
3 One investigator (JW) will screen titles and abstracts, and full bibliographic citations to  
4 identify candidate articles. Two investigators (JW and BN) will then independently review  
5 the full text to exclude articles that will not meet the inclusion criteria. Differences will be  
6 resolved by discussion and consensus.  
7

### 8 **Data Extraction:**

9 Data extraction will follow three steps. Firstly, two investigators will abstract the following  
10 information from each article: description of the barrier, the percentage of respondents  
11 describing the barrier, demographics of the respondents, and also study characteristics  
12 including sample size and response rate. Differences will be resolved by discussion and  
13 consensus. Secondly, the barriers will be grouped into common themes. Thirdly, the barriers  
14 will be organised into groups based on the knowledge, attitudes, behaviour framework.<sup>4</sup>  
15 Before an integrative review can affect patient outcomes, it must first affect health  
16 professional knowledge, then attitudes, and finally behaviour. Factors impacting on  
17 cognition, affect and behaviour will be considered as potential barriers. A survey will be  
18 defined as having at least one question to a group about potential barriers to knowledge  
19 uptake from a systematic review, a meta-analysis, or the databases containing them.  
20  
21  
22

### 23 **Assessment of risk of bias**

24 Important flaws in individual studies such as a lack of random selection of participants,  
25 inadequate description of the sample frame, and a poor response rate will be described. For  
26 purposes of quality assessment, study characteristics will be extracted by two investigators:  
27 country of origin, year of publication, main objective of the study, design of the study,  
28 characteristics of participants, sampling strategy, response rate, and methodological  
29 approach, including data collection strategies. Differences in assessment of risk of bias will  
30 be resolved by consensus or consultation with a third party (MC). Publication bias will be  
31 minimised by the extensive search strategy.  
32  
33

### 34 **Synthesis**

35 We intend to bring together findings from different study designs within different methods  
36 and approaches. It is not expected that it will be possible to carry out a meta-analysis due to  
37 the high degree of anticipated heterogeneity across settings, participants, and data collection  
38 methods. A narrative synthesis with appropriate tabulation is anticipated.  
39  
40

41 The type of barrier will be tabulated, together with the comprehensiveness of surveys. How  
42 often surveys considered the full variety of barriers to knowledge uptake will be indicated.  
43 The number and characteristics of the surveys examining each barrier will be documented.  
44 The targeted populations and their location will be identified. The sample size, method of  
45 selection, and response rate will also be reported. The percentage of respondents identifying a  
46 particular barrier will also be listed. Tables will be completed outlining the study  
47 characteristics, methods and results.  
48

49 Evidence synthesis is a process of combining evidence from individual studies to create a  
50 new understanding by comparing and analysing concepts and findings from different sources  
51 of evidence with a focus on the same topic of interest. The aim is to identify and extract  
52 evidence, categorise the evidence, and combine the categories to develop synthesized  
53 findings. The overall objective is to build an explanation of why people do not use knowledge  
54 from systematic reviews.  
55  
56  
57  
58  
59  
60

1  
2  
3 Excluded studies will be listed in a 'Characteristics of excluded studies' table with a succinct  
4 summary of why studies were excluded. On-going studies and studies awaiting classification  
5 if found will be listed.  
6

7 A summary of the main results will be reported together with an assessment of the overall  
8 completeness and applicability of the evidence, together with key methodological limitations.  
9

10 **Aim:** We are interested in improving the relevance and utility of systematic reviews. The aim  
11 of the review outlined here is to identify barriers to uptake of evidence from systematic  
12 reviews and meta-analyses. The objective is also to offer a differential diagnosis for why  
13 decision makers do not use knowledge from systematic reviews as well as providing a  
14 rational strategy aimed at improving knowledge uptake from this important source of pre-  
15 appraised, integrated evidence, together with a frame work for future research.  
16  
17

### 18 **Potential conflict of interest**

19 None known  
20

### 21 **Sources of support**

22 No internal or external sources of support supplied  
23  
24

### 25 **Contact address**

26 Dr John Wallace,  
27 Rewley House,  
28 1 Wellington Square,  
29 University of Oxford,  
30 Oxford OX1 2JA, UK  
31  
32  
33  
34

### 35 **REFERENCES**

- 36 1. Grimshaw JM, Thomas RE, MacLennan G, Fraser C, Ramsay CR, Vale L, et al.  
37 Effectiveness and efficiency of guideline dissemination and implementation  
38 strategies. *Health Technol Assess* 2004;8(6).  
39  
40 2. Sackett D, Rosenberg WC, Muir Gray JA. Haynes R B, and Richardson WS.  
41 Evidence based medicine: what it is and what it isn't. *BMJ* 1996; 312: 71.  
42  
43 3. Cabana M, Rand CS, Powe NR, Wu AW, Wilson MH, Abboud PAC, Rubin HR.  
44 Why don't physicians follow clinical practice guidelines? A framework for  
45 improvement. *JAMA* 1999; 282(15):1458-1465.  
46  
47 4. Woolf SH. Practice guidelines: a new reality in medicine, III: impact on patient care.  
48 *Arch Intern Med.* 1993;153: 2646-2655.  
49  
50  
51  
52  
53  
54  
55  
56  
57  
58  
59  
60



**Barriers to uptake of evidence from systematic reviews and meta-analyses: a systematic review of decision makers' perceptions**

|                                 |                                                                                                                                                                                                                                                                                |
|---------------------------------|--------------------------------------------------------------------------------------------------------------------------------------------------------------------------------------------------------------------------------------------------------------------------------|
| Journal:                        | <i>BMJ Open</i>                                                                                                                                                                                                                                                                |
| Manuscript ID:                  | bmjopen-2012-001220.R1                                                                                                                                                                                                                                                         |
| Article Type:                   | Research                                                                                                                                                                                                                                                                       |
| Date Submitted by the Author:   | 23-Jun-2012                                                                                                                                                                                                                                                                    |
| Complete List of Authors:       | Wallace, John; University of Oxford, DPhil international programme in evidence-based health care<br>Nwosu, Bosah; Royal College of Surgeons in Ireland, First Episode Psychosis Study<br>Clarke, Mike; Queen's University, MRC all-Ireland Hub for Trials Methodology Research |
| <b>Primary Subject Heading</b>: | Evidence based practice                                                                                                                                                                                                                                                        |
| Secondary Subject Heading:      | Medical education and training                                                                                                                                                                                                                                                 |
| Keywords:                       | MEDICAL EDUCATION & TRAINING, QUALITATIVE RESEARCH, Information management < BIOTECHNOLOGY & BIOINFORMATICS, Quality in health care < HEALTH SERVICES ADMINISTRATION & MANAGEMENT                                                                                              |
|                                 |                                                                                                                                                                                                                                                                                |

SCHOLARONE™  
Manuscripts

only

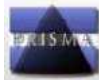

# PRISMA 2009 Checklist

1  
2  
3  
4  
5  
6  
7  
8  
9  
10  
11  
12  
13  
14  
15  
16  
17  
18  
19  
20  
21  
22  
23  
24  
25  
26  
27  
28  
29  
30  
31  
32  
33  
34  
35  
36  
37  
38  
39  
40  
41  
42  
43  
44  
45  
46  
47  
48  
49

| Section/topic                      | #  | Checklist item                                                                                                                                                                                                                                                                                              | Reported on page # |
|------------------------------------|----|-------------------------------------------------------------------------------------------------------------------------------------------------------------------------------------------------------------------------------------------------------------------------------------------------------------|--------------------|
| <b>TITLE</b>                       |    |                                                                                                                                                                                                                                                                                                             |                    |
| Title                              | 1  | Identify the report as a systematic review, meta-analysis, or both.                                                                                                                                                                                                                                         | 1                  |
| <b>ABSTRACT</b>                    |    |                                                                                                                                                                                                                                                                                                             |                    |
| Structured summary                 | 2  | Provide a structured summary including, as applicable: background; objectives; data sources; study eligibility criteria, participants, and interventions; study appraisal and synthesis methods; results; limitations; conclusions and implications of key findings; systematic review registration number. | 1                  |
| <b>INTRODUCTION</b>                |    |                                                                                                                                                                                                                                                                                                             |                    |
| Rationale                          | 3  | Describe the rationale for the review in the context of what is already known.                                                                                                                                                                                                                              | 2                  |
| Objectives                         | 4  | Provide an explicit statement of questions being addressed with reference to participants, interventions, comparisons, outcomes, and study design (PICOS).                                                                                                                                                  | 3                  |
| <b>METHODS</b>                     |    |                                                                                                                                                                                                                                                                                                             |                    |
| Protocol and registration          | 5  | Indicate if a review protocol exists, if and where it can be accessed (e.g., Web address), and, if available, provide registration information including registration number.                                                                                                                               | 22                 |
| Eligibility criteria               | 6  | Specify study characteristics (e.g., PICOS, length of follow-up) and report characteristics (e.g., years considered, language, publication status) used as criteria for eligibility, giving rationale.                                                                                                      | 3                  |
| Information sources                | 7  | Describe all information sources (e.g., databases with dates of coverage, contact with study authors to identify additional studies) in the search and date last searched.                                                                                                                                  | 3                  |
| Search                             | 8  | Present full electronic search strategy for at least one database, including any limits used, such that it could be repeated.                                                                                                                                                                               | 3                  |
| Study selection                    | 9  | State the process for selecting studies (i.e., screening, eligibility, included in systematic review, and, if applicable, included in the meta-analysis).                                                                                                                                                   | 3                  |
| Data collection process            | 10 | Describe method of data extraction from reports (e.g., piloted forms, independently, in duplicate) and any processes for obtaining and confirming data from investigators.                                                                                                                                  | 3                  |
| Data items                         | 11 | List and define all variables for which data were sought (e.g., PICOS, funding sources) and any assumptions and simplifications made.                                                                                                                                                                       | 4                  |
| Risk of bias in individual studies | 12 | Describe methods used for assessing risk of bias of individual studies (including specification of whether this was done at the study or outcome level), and how this information is to be used in any data synthesis.                                                                                      | 4                  |
| Summary measures                   | 13 | State the principal summary measures (e.g., risk ratio, difference in means).                                                                                                                                                                                                                               | 6                  |
| Synthesis of results               | 14 | Describe the methods of handling data and combining results of studies, if done, including measures of consistency (e.g., $I^2$ for each meta-analysis).                                                                                                                                                    | 6                  |

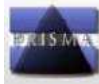

# PRISMA 2009 Checklist

Page 1 of 2

| Section/topic                 | #  | Checklist item                                                                                                                                                                                           | Reported on page # |
|-------------------------------|----|----------------------------------------------------------------------------------------------------------------------------------------------------------------------------------------------------------|--------------------|
| Risk of bias across studies   | 15 | Specify any assessment of risk of bias that may affect the cumulative evidence (e.g., publication bias, selective reporting within studies).                                                             | 6                  |
| Additional analyses           | 16 | Describe methods of additional analyses (e.g., sensitivity or subgroup analyses, meta-regression), if done, indicating which were pre-specified.                                                         | -                  |
| <b>RESULTS</b>                |    |                                                                                                                                                                                                          |                    |
| Study selection               | 17 | Give numbers of studies screened, assessed for eligibility, and included in the review, with reasons for exclusions at each stage, ideally with a flow diagram.                                          | 5                  |
| Study characteristics         | 18 | For each study, present characteristics for which data were extracted (e.g., study size, PICOS, follow-up period) and provide the citations.                                                             | 6                  |
| Risk of bias within studies   | 19 | Present data on risk of bias of each study and, if available, any outcome level assessment (see item 12).                                                                                                | Table 2            |
| Results of individual studies | 20 | For all outcomes considered (benefits or harms), present, for each study: (a) simple summary data for each intervention group (b) effect estimates and confidence intervals, ideally with a forest plot. | Table 3            |
| Synthesis of results          | 21 | Present results of each meta-analysis done, including confidence intervals and measures of consistency.                                                                                                  | 6                  |
| Risk of bias across studies   | 22 | Present results of any assessment of risk of bias across studies (see Item 15).                                                                                                                          | 6                  |
| Additional analysis           | 23 | Give results of additional analyses, if done (e.g., sensitivity or subgroup analyses, meta-regression [see Item 16]).                                                                                    | -                  |
| <b>DISCUSSION</b>             |    |                                                                                                                                                                                                          |                    |
| Summary of evidence           | 24 | Summarize the main findings including the strength of evidence for each main outcome; consider their relevance to key groups (e.g., healthcare providers, users, and policy makers).                     | 8                  |
| Limitations                   | 25 | Discuss limitations at study and outcome level (e.g., risk of bias), and at review-level (e.g., incomplete retrieval of identified research, reporting bias).                                            | 9                  |
| Conclusions                   | 26 | Provide a general interpretation of the results in the context of other evidence, and implications for future research.                                                                                  | 9                  |
| <b>FUNDING</b>                |    |                                                                                                                                                                                                          |                    |
| Funding                       | 27 | Describe sources of funding for the systematic review and other support (e.g., supply of data); role of funders for the systematic review.                                                               | 13                 |

From: Moher D, Liberati A, Tetzlaff J, Altman DG, The PRISMA Group (2009). Preferred Reporting Items for Systematic Reviews and Meta-Analyses: The PRISMA Statement. PLoS Med 6(6): e1000097. doi:10.1371/journal.pmed1000097

For more information, visit: [www.prisma-statement.org](http://www.prisma-statement.org).

Page 2 of 2

For peer review only - <http://bmjopen.bmj.com/site/about/guidelines.xhtml>

## Barriers to uptake of evidence from systematic reviews and meta-analyses: a systematic review of decision makers' perceptions

**Authors:** John Wallace, Bosah Nwosu, and Mike Clarke

### ABSTRACT

**Objective:** To review the barriers to the uptake of research evidence from systematic reviews by decision makers.

**Search strategy:** We searched 19 databases covering the full range of publication years, utilised three search engines, and also personally contacted investigators. Reference lists of primary studies and related reviews were also consulted.

**Selection criteria:** Studies were included if they reported on the views and perceptions of decision makers on the uptake of evidence from systematic reviews, meta-analyses, and the databases associated with them. All study designs, settings, and decision makers were included. One investigator screened titles to identify candidate articles then two reviewers independently assessed the quality and the relevance of retrieved reports.

**Data extraction:** Two reviewers described the methods of included studies and extracted data that were summarised in tables and then analysed. Using a pre-established taxonomy, the barriers were organized into a framework according to their effect on knowledge, attitudes, or behaviour.

**Results:** Of 1,726 articles initially identified, we selected 27 unique published studies describing at least 1 barrier to the uptake of evidence from overviews. These studies included a total of 25 surveys and 2 qualitative studies. Overall, the majority of participants (n=10,218) were physicians (64%). The most commonly investigated barriers were lack of use (14/25), lack of awareness (12/25), lack of access (11/25), lack of familiarity (7/25), lack of usefulness (7/25), lack of motivation (4/25), and external barriers (5/25).

**Conclusion:** This systematic review reveals that strategies to improve uptake of evidence from reviews and meta-analyses will need to overcome a wide variety of obstacles. Our review describes the reasons why knowledge users, especially physicians, do not call on systematic reviews. This study can inform future approaches to enhancing systematic review uptake and also suggests potential avenues for future investigation.

### INTRODUCTION

Many researchers are worried about the extent to which research knowledge is utilised.<sup>1</sup> An important finding from health research is the limited success in routinely transferring research knowledge into clinical practice. Studies can't ensure the utilisation of their results. While evidence does not speak for itself, **researchers can increase the likelihood of their research results being used.** Tackling the knowledge-to-practice deficit is challenging and entails an investigation of the numerous obstacles to knowledge uptake.<sup>2</sup>

The transfer of important clinical knowledge is impeded by the amount and also the on-going growth of the biomedical literature. Pre-appraised, integrative reviews diminish this problem. A systematic review is a review of 'a clearly formulated question that uses systematic and explicit methods to identify, select and critically appraise relevant research, and to collect and



analyse data from studies that are included in the review'.<sup>3</sup> The contribution of systematic reviews to the research literature is seen in a range of bibliographic databases such as The Cochrane Library.

A systematic review that integrates the findings of discrete studies against the background of global evidence can be considered the basic unit of evidence transfer.<sup>4</sup> Synthesis should help with policy formulation, the development of clinical practice guidelines, as well as informing routine decision making in clinical practice. Failure to use the findings from systematic reviews and meta-analyses can reduce healthcare efficiency and compromise quality of life.

But the mere existence of reviews does not ensure their dissemination and their application to routine practice and policy formulation. The uptake of evidence from systematic reviews has been inconsistent.<sup>4</sup> When unsure about diagnostic and management issues, physicians routinely consult with a colleague or read a text.<sup>5</sup>

While many investigations have been conducted on the barriers to the uptake of research evidence in general, little is known specifically about the determinants of uptake of systematic review evidence in particular. In the past, there have been reviews of the barriers to adherence to clinical guidelines,<sup>6</sup> of the barriers to the appropriate use of research evidence in policy decisions,<sup>1</sup> of the barriers and facilitators to implementing shared decision-making,<sup>7</sup> of the barriers to improving the usefulness of systematic reviews for health care managers and policy makers<sup>8</sup> and lastly, of the barriers and incentives to optimal health care.<sup>9</sup>

Systematic reviews were the focus of this investigation, rather than the more commonly investigated clinical practice guidelines or individual, primary studies. Systematic reviews are based on primary research while clinical practice guidelines are an amalgam of clinical experience, expert opinion, patient preferences, and evidence. Systematic reviews are a scientific exercise aimed at generating new knowledge and provide a summary of relevant primary research. In this way they can help keep us current. Systematic reviews have a distinct development and scientific purpose that differs from both guidelines and primary research.

Many factors contribute to the varying uptake of evidence in general.<sup>10</sup> These include financial obstacles, the sheer volume of research evidence, and the difficulties in applying global evidence in a local clinical context.<sup>11</sup> Other barriers include limited time and awareness of evidence sources, limited critical appraisal skills and the relevance of research findings.<sup>12</sup> Given the considerable differences between systematic reviews, primary research, and clinical practice guidelines, we set out specifically to identifying the barriers to uptake of pre-appraised, integrative reviews and meta-analyses.

What are the barriers to the uptake of evidence from systematic reviews, meta-analyses and the databases that contain them? Here we were concerned with all decision makers, including physicians, policy makers, patients and nursing staff. Such barrier identification can aid the development of effective strategies to improve the uptake of systematic reviews and meta-analyses by decision makers. Interventions to improve the use of systematic reviews for clinical and commissioning decision making are currently being investigated.<sup>11</sup>

## Methods



### *Search strategy*

We conducted a systematic review of the literature to identify barriers to evidence uptake from pre-appraised, integrative reviews and meta-analyses. The primary researcher (JW) searched 19 databases and used 3 search engines, for articles, not limited to the English language, drawing on the entire range of publication years covered in each database up to Dec 2010 using a combination of index terms and text words identified from previously identified, relevant articles. The databases included The Cochrane Library, TRIP, Joanna Biggs I.N.G, National Guideline Clearing House, Health Evidence, PubMed (1950-2010), EMBASE (1980-2010), ERIC, CINAHL, PsycInfo, OpenSigle, Index to Theses in Great Britain and Ireland, and Conference Papers Index. Campbell Collaboration, Canadian Health Services Research Foundation, EPOC, KT+, McMaster University, Keenan Research Centre, and the New York Academy of Medicine. The search engines ALTA VISTA and Google scholar were also utilised. References from included primary studies and related review articles were scanned, experts in the field contacted, and bibliographies of textbooks were reviewed. The following search terms were included: obstacle, barrier, impede, utilisation, uptake, systematic review and meta-analysis.

We repeated aspects of the search for the period December 2010 to **June** 2012. The aim was to identify any further relevant or on-going studies to be included in 'Studies awaiting classification' or 'On-going studies' that could be used in a later update of this systematic review. We applied similar search strategies to PubMed and EMBASE, the two most productive bibliographic databases in terms of studies already identified for inclusion in the review.

### *Selection criteria*

We included studies if they presented an original collection of data. Studies containing interviews, focus groups and surveys with all decision makers, **such as doctors, nurses, occupational therapists, policy makers and patients**, were eligible. Selection criteria did not specify that the inclusion of studies was restricted to those reporting, as their main purpose, the identification of obstacles specifically to systematic review uptake. No study design or language was excluded. Studies were included if they addressed perceived barriers to uptake of evidence specifically from systematic reviews, meta-analyses and the databases that contained them such as The Cochrane Library, The Cochrane Database of Systematic Reviews, Database of Abstracts of Reviews of **Effects**, Cochrane Pregnancy and Childbirth Database, Oxford Database of Perinatal Trials, and the Reproductive Health Library.

A barrier was defined as any factor that impedes or obstructs uptake of evidence from systematic reviews. **Barriers to evidence uptake can negatively impact on access, awareness, familiarity, intellectual adoption, and actual use of systematic reviews. Barriers can also limit the positive influence of current systematic review results on patient care.** We focused on factors that could be altered or overcome rather than the gender or age of decision makers.<sup>6</sup> In many of the reports, participants specified obstacles via response to survey questions. For qualitative studies, major themes from focus groups or interviews identified the obstacles to uptake.

Special care was taken to identify studies that appeared in multiple publications.<sup>13</sup> When more than one report described a specific study and each presented the same data, then the most recent publication was included for analysis. However, if more than one publication described a single investigation but each presented novel and complementary evidence then both were utilised.

### *Data collection and analysis*

Reports were retrieved if it appeared likely that they contained **data** regarding barriers to uptake of evidence from systematic reviews. The first reviewer reviewed all the citations, and followed up reference lists, while the retrieved full reports were assessed by at least two reviewers (JW and BN) for inclusion in the review. Disagreements were resolved by discussion, or adjudication by a third party (MC). Reports appearing relevant initially, but which were not, joined a list of excluded studies maintained by the author (JW).

Using a data collection form, two reviewers (JW and BN) extracted data from the included studies. Information extracted from each article included a description of the barriers identified, the percentage of participants highlighting the barrier, demographics of the respondents, and the characteristics of the included study. Where possible, we estimated the percentages of respondents affected by an obstacle as the difference between 100% and the sum of the percentage with no opinion and those not affected.<sup>6</sup> The data extraction sheet was created based on a taxonomy of barriers to implementing clinical practice guidelines.<sup>6</sup> **The mechanism of action by which improved patient care is attained is believed to proceed through a number of stages.<sup>14</sup> Research evidence alters eventual clinical outcome through the intermediate steps of first changing clinician knowledge, then improving attitudes, and lastly, changing practitioner behaviour.** This taxonomy had been used with success by other investigators. It is reported to stand up well in comparison with alternative taxonomies.<sup>7</sup>

Both reviewers independently read each report and identified evidence relevant to each of the main outcomes of interest. Barriers were then grouped into themes and the obstacles ordered according to the number of studies in which they were identified. The themes were organised into groups depending on whether they impacted on knowledge, attitude, or behaviour.<sup>6</sup> The categories drew on an ideal mechanism of a knowledge, attitudes, and behaviour framework.<sup>14</sup> Before a systematic review can affect patient outcome, it first affects knowledge, then attitudes, and finally, behaviour.

Lack of familiarity and awareness, for instance, were listed under the Knowledge heading; lack of motivation was listed under Attitudes; patient, review and environmental factors were grouped under the Behaviour heading. Barriers impeding review uptake through a cognitive component were considered obstacles affecting knowledge. If an affective component was identified then the barrier was listed as impeding attitude. A limitation or restriction on ability was regarded as a barrier affecting behaviour. Lack of familiarity included impaired ability to correctly answer questions about review content, as well as self-acknowledged lack of familiarity. Lack of awareness was viewed as the inability to adequately acknowledge systematic review existence.

Study characteristics were included in Table 1. Methods were outlined in Table 2; the results were tabulated in Table 3.

In order to assess the quality of the studies, study characteristics were extracted: year of publication, country of origin, main objective of the study, the design of the study, and the characteristics of participants. In particular, the sampling strategy of the primary studies, response rate, and methodological approach, including data collection strategies, were assessed.

## **RESULTS**

### Search yield

Of 19 databases searched and three search engines utilized, there were 1,726 specific candidate articles found possibly examining barriers to uptake of evidence from systematic reviews. Some 1,651 titles were excluded after examination of the bibliographic citation. After examination of the full text of 75 articles, 13 articles fulfilled the criteria. Fifteen primary studies were detected from the reference lists of these 75 articles. A total of 28 detected reports describing 27 unique studies met inclusion criteria. **Thirteen studies that might possibly be expected to be included but are not, are outlined in Table 4 together with the reasons for their exclusion. To be included, studies had to address perceived obstacles to uptake of evidence specifically from systematic reviews, meta-analyses and the databases that contained them.** A search of EMBASE and PubMed from January 2011 to June 2012, failed to detect any relevant, completed or on-going studies to be added to 'Studies awaiting classification' and 'On-going studies' tables. The search terms and their combination are outlined in tables 5 and 6.

The 27 included studies encompassed 2 qualitative studies, and 25 surveys asking a total of 57 questions regarding possible barriers to uptake of evidence from systematic reviews, meta-analysis, and the databases containing them. A survey involved at least one question to a group of decisions makers about barriers to uptake of evidence from systematic reviews. Barriers were grouped into themes: 18 derived from the surveys and an additional 10 from the qualitative studies.

**Figure 1. PRISMA Flow diagram**

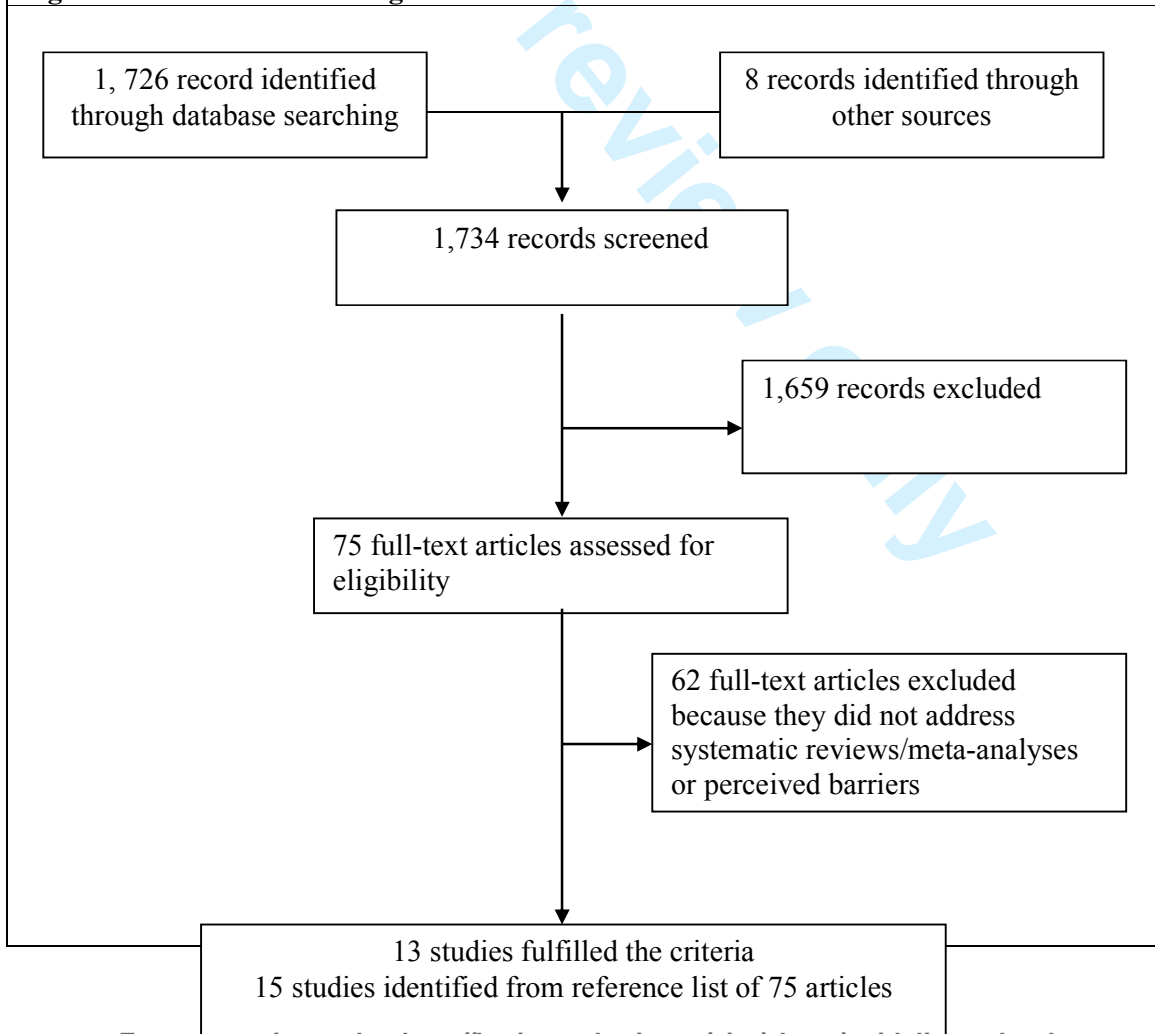

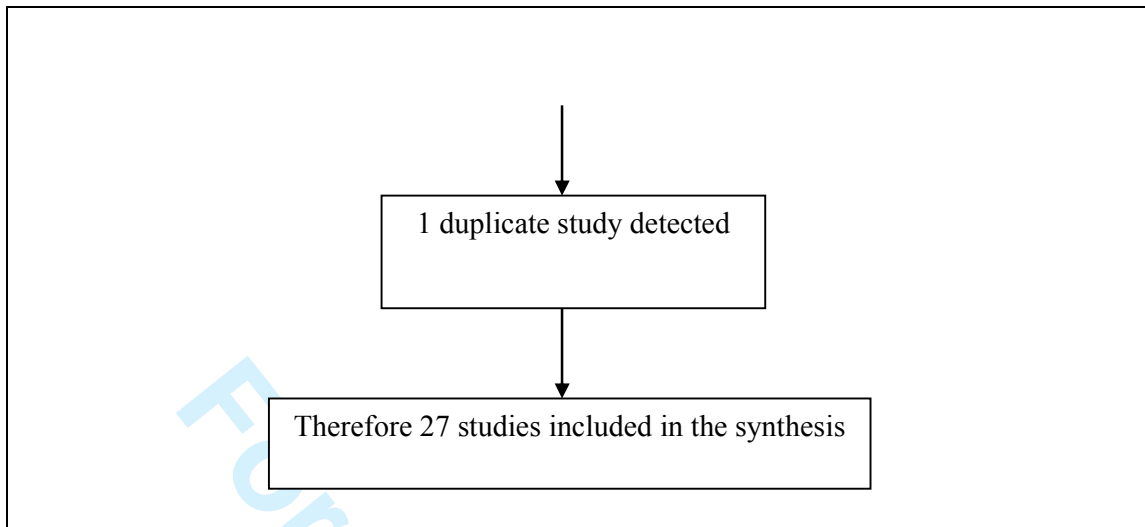

The studies were undertaken in the UK (n=9), Canada (n=5), Australia (n=4), USA (n=3), Ireland (n=1), Holland (n=1), New Zealand (n=1), Switzerland (n=1), India (n=1), and SE Asia: Indonesia, Malaysia, Thailand, the Philippines (n=1). One country, Switzerland, surveyed participants from 78 countries. Therefore, included studies reported data from decision makers in 91 countries.

Of 10,218 participants, 64% were physicians (Table 7). Two studies were concerned with the use of systematic review evidence for public health policy and programme management decisions.<sup>24, 25</sup> The remaining studies had a clinical practice focus concerned with investigating attitudes to evidence-based medicine. Seventeen studies (63%) were published after the year 2000.

### *Study Quality*

The included studies were limited in terms of the quality and generalizability of their results. While all but one<sup>15</sup> had a well-described sampling frame, just eight of the 27 studies describe selecting a random sample of participants (Table 2). Response rates were not mentioned in two<sup>16, 25</sup> of the 27 studies (Table 2). The response rate was variable. The rate varied from 8.8% to 100% and 17 of the 27 studies describe a response rate of at least 60% (Table 2). Twenty-six studies reported the number of participants investigated, with the number varying from 16 to 1,406.

The number of barriers addressed by each survey varied. Of the 25 surveys, 8 (31%) examined only one type of barrier, and the average number of barriers examined was 1.7. None of the surveys examined 6 or more barriers and all studies relied on reported use, **not actual use**, of evidence.

### *Characteristics of Studies*

Most studies were surveys (n=25), 2 were qualitative studies with one included study using mixed methods. Data collection strategies included focus groups (n=1), individual interviews (n=1), together with mail, telephone, and web-based questionnaires (n=25).

The characteristics of each study are outlined in Table 1. We found that the surveys used a heterogeneous variety of decision-making populations, based on location or speciality. They also investigated a number of resources. The surveys looked at systematic reviews, meta-

analyses, The Cochrane Library, the Cochrane Database of Systematic Reviews (one of the six high-quality databases maintained by the Library), Database of Abstracts of Reviews of Effects, the Reproductive Health Library, also the earlier Cochrane Pregnancy and Childbirth Database and the Oxford Database of Perinatal Trials. The surveys displayed a wide range of the percentage of respondents reporting each barrier (Table 3).

### *Identifying barriers*

After classifying possible barriers into common themes, it was found that the 57 questions about obstacles to uptake of evidence from systematic reviews encompassed 28 barriers. These were grouped according to the knowledge/attitude/behaviour framework.<sup>14</sup> Barriers affecting knowledge could include lack of awareness, lack of familiarity and a lack of understanding of meta-analyses. Lack of confidence, decreased motivation, a perceived lack of usefulness of systematic reviews and limited trust in them, were grouped under Attitudes. Systematic review attributes, patient issues, and environmental factors have the potential to impair usage of systematic reviews. Attributes of systematic reviews such as academic terminology, and environmental factors such as limited resources or a negative organisational climate, were grouped under Behaviour.

### *Knowledge*

Eleven studies measured lack of awareness as a possible barrier. Sample size ranged from 248 to 8,100 (median, 475) and the response rate ranged from 8.8% to 90% (median, 66%). The percentage of respondents reporting lack of awareness as a barrier was as high as 82% (for DARE<sup>17</sup>) and as low as 1% (for Cochrane Library<sup>18</sup>) with a median of 55%. In 9 (82%) of the 11 studies, at least 10% of the respondents cited lack of awareness as a barrier.

Seven surveys measured lack of familiarity as a possible barrier. Sample size ranged from 60 to 8,100 (median, 531) and the response rate ranged from 8.8% to 100% (median, 63%). The percentage of respondents suggesting lack of familiarity as a barrier was as high as 98% (DARE<sup>17</sup>) and as low as 19% (systematic reviews<sup>17</sup>) with a median of 70%. In 7 (100%) of the 7 surveys, at least 10% of the respondents cited lack of familiarity as a barrier.

### *Attitude*

Four studies measured lack of motivation as a possible barrier. Sample size ranged from 98 to 8,100 (median, 1,305). The percentage of respondents identifying this barrier was as high as 10% (Oxford Database of Perinatal Trials<sup>21</sup>) and as low as 2% (meta-analysis<sup>22</sup>) with a median of 3.6%. In none of the surveys did more than 10% of respondents report lack of motivation as a barrier.

Seven surveys measured lack of perceived usefulness as a possible barrier. Sample size ranged from 60 to 491 (median, 350), and the response rate ranged from 63% to 100% (median, 87%). The percentage of respondents identifying lack of usefulness as a barrier was as high as 95% (systematic reviews<sup>17</sup>) and as low as 7% (Cochrane Library<sup>18</sup>) with a median of 16.5%. In six of the seven surveys, at least 10% of the respondents cited lack of usefulness as an issue.

### *Behaviour*

Eleven surveys measured lack of access as a possible barrier. Sample size ranged from 60 to 3,087 (median, 440), and the response rate ranged from 44% to 100% (median, 71%). The percentage of respondents identifying lack of access as a barrier was as high as 95% (lack of easy access to Cochrane Library<sup>19</sup>) and as low as 3% (lack of access to Cochrane Library<sup>20</sup>),



with a median of 55%. In 10 (91%) of the 11 surveys, at least 10% of the respondents cited lack of access as a barrier.

Five studies investigated 10 external barriers to overview uptake. The external barriers investigated were environment-related in 5 studies and also systematic review-related in one study, with no patient-related barriers cited. More than 10% of respondents cited lack of resources and lack of positive policy climate<sup>23</sup>, lack of workshop attendance<sup>16</sup>, and lack of training in Cochrane Library use<sup>18, 20</sup> as possible environmental barriers. Lack of time was not cited by more than 10% of participants.<sup>18</sup> More than 10% of respondents cited the limited range of topics covered by the Cochrane Library<sup>18</sup> as a possible barrier.

Fourteen surveys looked at lack of use of systematic reviews. Sample size ranged from 150 to 8,100 (median, 490) and the response rate ranged from 8.8% to 100% (median, 63%). The percentage of respondents reporting lack of use was as high as 99% (DARE<sup>17</sup>) and as low as 18% (Cochrane Library<sup>16</sup>) with a median of 78%. In 14 (100%) of the 14 surveys at least 10% of the respondents did not use systematic reviews or the databases containing them.

### Qualitative studies

Two qualitative studies<sup>24, 25</sup> cited six important barriers to evidence uptake from systematic reviews. The two studies emphasised lack of accessibility. They also cited a lack of training in the purpose and methodology of systematic reviews as a barrier to uptake. Content issues such as lack of relevance, lack of implications for practice, and limited implementation strategies were also cited. A deficient understanding of the information needs of the target audience of systematic reviews was also raised as a major barrier.

One study had a qualitative element exploring the perceived weaknesses of the Cochrane Library.<sup>18</sup> Participants suggested as barriers the limited range of topics covered, poor access, the narrow focus on RCTs and meta-analysis, difficulty of use, lack of regular update, poor promotion, and the time required to use and search the database. Number of barriers investigated by each study is tabulated in Table 8.

## DISCUSSION

Accessible databases are an essential resource. Access impacts on awareness and familiarity. While access is improving, **The Cochrane Library is not free in all countries**. In almost all the included surveys, at least 10% of the respondents still cited lack of access as a barrier.

Many review resources, such as The Cochrane Library, have achieved widespread awareness. However in the majority of the studies, more than 10% of the respondents still cited lack of awareness of systematic reviews or the databases that contained them, as a barrier to uptake.

Casual awareness does not guarantee familiarity with, or the ability to use, systematic reviews. Lack of familiarity with databases containing systematic reviews was more common than a lack of awareness.<sup>17</sup> In all of the seven surveys measuring lack of perceived usefulness as a possible barrier, at least 10% of the respondents cited limited usefulness of systematic reviews as a problem.

Appropriate knowledge and attitudes are necessary but not sufficient for uptake of evidence from systematic reviews. There may be review, patient, or environmental barriers that inhibit the use of this form of evidence. Content issues such as lack of relevance, lack of implications for practice, lack of implementation strategies<sup>25</sup> and the limited range of topics

covered in systematic reviews<sup>18</sup> can be barriers. More than 10% of respondents cited lack of resources, lack of appropriate policy climate,<sup>23</sup> and lack of training in systematic review or database searching<sup>20</sup> as possible environmental barriers.

The everyday usage of systematic reviews should lead to improved knowledge of, and improved attitudes to, this form of pre-appraised evidence. However, in all of the 14 surveys that looked at this issue, at least 10% of the respondents did not use systematic reviews or the databases containing them, with the percentage of respondents reporting lack of use as high as 99%.<sup>17</sup>

Interestingly, in contrast to work on the uptake of research evidence in general, lack of time did not emerge as a major barrier to uptake of evidence specifically from systematic reviews. No patient-related barriers, such as inability to reconcile patient preferences with review evidence, were highlighted in our study. Nor, importantly, did lack of motivation to use systematic reviews emerge as a major issue.

### *Limitations*

The extensive and systematic literature search is one of the strengths of this systematic review. Explicit inclusion criteria and a transparent approach to collecting data were also utilised. Each included study was assessed by at least two of the authors. The limitations of our systematic review largely reflect the shortcomings of the reports reviewed.

All the 27 included studies, except the two qualitative studies, were surveys using closed-ended questions. This meant that the obstacles addressed were dependent very much on investigator preference. A fear of being outside a consensus for instance, was not specifically investigated as a barrier. Use of a different taxonomy may have altered our findings. But the taxonomy selected and utilised here compares well to other taxonomies.<sup>26</sup>

Because much of the research in the knowledge translation field is poorly indexed in electronic databases and spread over many disciplines, relevant studies may have been overlooked, though searching the reference lists of related studies yielded additional reports.

Another potential defect is the use of participant self-ratings. The individual studies depended on the decision maker's perceptions and views. Actual clinical practice was not assessed. Whether an obstacle is real or perceived may affect the strategy required to address the identified barrier.

Some of the included studies were limited with respect to sampling and generalizability. Some surveys were small and used non-random samples confined to specific groups. This limits the extent to which the findings can be generalised.<sup>27</sup> A well-described sampling frame and a good response rate improve our confidence in a study's results.<sup>28</sup> A low response rate in some of the surveys increases the potential for selection bias. The external validity of the studies can be questioned as a poor response rate increases the impact of non-responder bias in the survey results.<sup>29</sup> However, by including a wide range of decision makers in our systematic review, this increases our appreciation of how differences in health-care systems can impact on review uptake.

### *Implications*

This analysis offers a list of reasons for understanding why decision makers may be disinclined to use systematic reviews. A number of the barriers already cited by Cabana and



colleagues<sup>6</sup> to guideline adherence were identified, though in our study time constraints, **limited motivation and patient related factors were not highlighted.** The results of this review have a number of implications for systematic review uptake in particular and evidence uptake in general.

Despite the high regard in which systematic reviews and The Cochrane Library are held, there are a variety of barriers to systematic review uptake. These include lack of access, lack of awareness, lack of familiarity, lack of perceived usefulness, limited actual use in practice and finally, a number of external barriers to do with systematic review content, presentation, and wider organisational factors.

Few studies however, consider the full variety of barriers that must be overcome to achieve enhanced uptake. The average number of barriers examined was 1.7. By not investigating a full variety of barriers, strategies to improve use are less likely to address all the important factors inhibiting systematic review uptake and, as a result, are less likely to be successful.<sup>6</sup> **Interventions designed to change practice should be based on an accurate assessment of the factors that support targeted health outcomes. The accuracy of this assessment is directly related to the future impact of the intervention.<sup>45</sup> If we accept this finding, then it is vital to identify the factors that influence the uptake of evidence from systematic reviews in order to help develop targeted interventions to enhance information uptake from this important resource.<sup>9</sup>** Future research needs to address a fuller range of impediments to evidence uptake.

Awareness of important resources, such as systematic reviews and the databases containing them, appears to be restricted. Limited self-reported understanding of systematic reviews indicates a potential limitation in the ability of many clinicians to critically appraise the literature.<sup>22</sup> More work needs to be carried out to promote a better understanding of systematic review terminology and related concepts.

Access to The Cochrane Library is critical in order to advance evidence-based healthcare.<sup>30</sup> Connectivity seems to have increased<sup>20</sup> but access and use of evidence databases needs to be improved. Even different professionals working in the same clinical setting can have different levels of access to the same database, an issue deserving of further investigation.<sup>20</sup> If most of those who have access to the database then go on to actually use the Cochrane Library then access may be an important issue to be investigated further. Strategies to assist those least likely to use Cochrane databases may help the move towards evidence-based practice.<sup>28</sup>

### **Conclusion**

**Much work has been done on the barriers to uptake of evidence from clinical practice guidelines.<sup>6</sup> The barriers that Cabana and colleagues identified to guideline adherence were lack of awareness and familiarity, lack of belief in a good outcome after adopting the guideline, and the inertia of previous practice, including lack of motivation.**

**Lack of motivation to use systematic reviews did not emerge as a major obstacle to systematic review uptake in our study. However, in common with research on the uptake of evidence in general, lack of access and limited awareness continue to be significant perceived barriers to systematic review uptake. Importantly, lack of practical use of systematic reviews continues to present a major challenge to evidence uptake. To become familiar with an innovation, it must be used. For systematic reviews, this is not happening often enough.**

Strategies to improve uptake of reviews should emphasize the usefulness of reviews for research and clinical practice. They should also provide a practical opportunity to use and become familiar with systematic reviews and the databases containing them, preferably in an organizational climate that values research.

To our knowledge, this study represents the first systematic review, of a diverse group of decision makers, of barriers to the uptake of evidence from systematic reviews, meta-analyses and their related databases. This investigation attempted to bring together the views of 10,218 decision makers from 91 countries, 64% of whom were physicians. From the 27 primary studies included in this systematic review, it is apparent that the barriers exist across different countries and impact on a variety of professional disciplines.

The results presented here have immediate and practical relevance for clinicians and organisations that are trying to improve access to the best available evidence and enhance its use in routine practice. These findings provide a sound basis on which to plan future interventions to enhance the uptake of evidence from systematic reviews and meta-analyses among physicians and other decision makers, leading to improved care for the individual patient.

## References

1. Innvaer S, Vist G, Trommald M et al. Health policy-makers' perceptions of their use of evidence: a systematic review. *Journal of Health Services Research & Policy* 2002; 7 (4): 239–244.
2. Straus S, Tetroe J, and Graham I. Knowledge to action: what it is and what it isn't. In Straus S, Tetroe J, and Graham I, editors. *Knowledge Translation in Health Care*. UK: Wiley-Blackwell, BMJ Books; 2009.
3. Sackett D, Rosenberg WC, Muir Gray JA, Haynes R B, and Richardson WS. Evidence based medicine: what it is and what it isn't. *BMJ* 1996; 312: 71.
4. Tetzlaff J, Tricco A, and Moher D. Knowledge Synthesis. In Straus S, Tetroe J, Graham I D, editors. *Knowledge translation in health care*. UK: Wiley-Blackwell, BMJ Books; 2009.
5. Bennet NL, Casebeer LL, Zheng S, Kristofco R. Information seeking behaviours and reflective practice. *J Contin Educ Prof* 2006; 26(2):120-7.
6. Cabana M, Rand CS, Powe NR et al. Why don't physicians follow clinical practice guidelines? A framework for improvement. *JAMA* 1999; 282(15):1458-1465.
7. Gravel, K., Legare, F., Graham, I. Barriers and facilitators to implementing shared decision-making in clinical practice: a systematic review of health care professionals. *Implementation science* 2006; 1:16.
8. Lavis J, Davies H, Oxman A et al. Toward systematic reviews that inform health care management. *Journal of Health Services Research & Policy* 2005; 10 Suppl 1: 35–48.

- 1  
2  
3 9. Cochrane L J, Olson C A, Murray S et al. Gaps between knowing and doing:  
4 Understanding and assessing the barriers to optimal health care. *Journal of Continuing*  
5 *Education in the Health Professions* 2007; 27: 94–102.  
6
- 7 10. Lavis JN. How can we support the use of systematic reviews in policy making? *PLoS*  
8 *Medicine* 2009;6(11):e1000141.doi:10.137/journal.pmed.1000141  
9
- 10 11. Murthy L, Shepperd S, Clarke M, Garner S, Lavis J, Roberts N W. Interventions to  
11 improve the use of systematic reviews for clinical and commissioning decision-making.  
12 *Cochrane Database of Systematic Reviews* 2011 Issue 10, Art.No.: CD009401, DOI:  
13 10.1002/14651858.CD009401  
14
- 15 12. Dobbins, M, Cockerill, R, Barnsley, J. and Ciliska, D. Factors of the innovation,  
16 organisation, environment, and individual that predict the influence five systematic reviews  
17 had on public health decisions. *International Journal of Technology Assessment in Health*  
18 *Care* 2001;17:4: 467-478.  
19
- 20 13. Lang T. and Secic M. How to report statistics in medicine. Philadelphia: ACP; 2006.  
21
- 22 14. Woolf SH. Practice guidelines: a new reality in medicine, III: impact on patient care.  
23 *Arch Intern Med.* 1993;153: 2646-2655.  
24
- 25 15. Young J. and Ward J. Evidence-based medicine in general practice: beliefs and barriers  
26 among Australian GPs. *Journal of Evaluation in Clinical Practice* 2001; 7 (2): 201-210.  
27
- 28 16. Martis R, Ho J, Crowther C. Survey of knowledge and perception on the access to  
29 evidence-based practice and clinical practice change among maternal and infant health  
30 practitioners in South East Asia. *BMC Pregnancy and Childbirth* 2008; 8:34.  
31
- 32 17. McColl A, Smith H, White P, et al. General practitioner's perceptions of the route to  
33 evidence based medicine: a questionnaire survey. *British Medical Journal* 1998; 316: 361 -  
34 365.  
35
- 36 18. Wilson P, Watt I and Hardman, P. Survey of medical directors' views and use of the  
37 Cochrane Library. *British Journal of Clinical Governance* 2001; 6(1): 34-39.  
38
- 39 19. Wilson P, Droogan J, Glanville J, Watt I, Hardman G. Access to the evidence base from  
40 general practice: a survey of general practice staff in Northern and Yorkshire Region. *Quality*  
41 *in Health Care* 2001;10:83–89.  
42
- 43 20. Wilson P, Glanville J, Watt I. Access to the online evidence base in general practice: a  
44 survey of the Northern and Yorkshire Region. *Health Information and Libraries Journal*  
45 2003;20:172-178.  
46
- 47 21. Paterson-Brown S, Fisk N, Wyatt J. Uptake of meta-analytical overviews of effective  
48 care in English obstetric units. *Journal of Obstetrics and Gynaecology* 1995; 102: 297-301.  
49
- 50 22. Sur R, Scales Jr C, Preminger G, Dahm P. Evidence-based medicine: a survey of  
51 american urological association members. *Journal of Urology* 2006; 176: 1127-1134.  
52  
53  
54  
55  
56  
57  
58  
59  
60

- 1  
2  
3 23. Ciliska D, Hayward S, Dobbins M, Brunton G, Underwood J. Transferring public-health  
4 nursing research to health-system planning: assessing the relevance and accessibility of  
5 systematic reviews. *Canadian Journal of Nursing Research* 1999; 31(1): 23-36.  
6  
7 24. Dobbins M, DeCorby K, and Twiddy T. A knowledge transfer strategy for public health  
8 decision makers. *Worldviews on Evidence-Based Nursing* 2004; 1(2): 120-128.  
9  
10 25. Dobbins M, Jack S, Thomas H, Kothari A. Public health decision-makers'  
11 informational needs and preferences for receiving information. *Worldviews on Evidence-*  
12 *based Nursing* 2007; 4(3): 156-163.  
13  
14 26. Espeland A, Baerheim A. Factors affecting general practitioners' decisions about plain  
15 radiography for back pain: implications for classification of guideline barriers – a qualitative  
16 study. *BMC Health Serv Res* 2003; 3:8.  
17  
18 27. Bennett S, Tooth L, McKenna K, Rodger S, Strong J, Ziviani J, et al. Perceptions of  
19 evidence-based practice: a survey of Australian occupational therapists. *Australian*  
20 *Occupational Therapy Journal* 2003;50, 13-22.  
21  
22 28. Kerse N, Arroll B, Lloyd T, Young J, Ward J. Evidence databases, the Internet, and  
23 general practitioners: the New Zealand story. 2001; *N Z Med J* 114;1127:89-91.  
24  
25 29. Dahm P, Poolman R, Bhandari M et al. 2009. Perceptions and Competence in Evidence-  
26 Based Medicine: A Survey of the American Urological Association Membership. *Journal of*  
27 *Urology* 2009; 18 (2): 767-77.  
28  
29 30. Young, J. and Ward, J. General practitioner's use of evidence databases. *MJA*. 1999;170:  
30 56-58.  
31  
32 31. Grol R, Grimshaw J. Evidence-based implementation of evidence-based medicine. *Jt*  
33 *Comm J Qual Improv* 1999 Oct; 25(10):503-13.  
34  
35 32. Melnyk B, Fineout-Overholt E, Feinstein N et al. Nurses' Perceived Knowledge, Beliefs  
36 Skills and Needs Regarding Evidence-Based Practice: Implications for accelerating the  
37 paradigm shift. *Worldviews on Evidence-based Nursing* 2004; 1(3): 185-93.  
38  
39 33. Prescott K, Lloyd M, Douglas H-R, Haines A, Humphrey C, Rosenthal J and Watt I.  
40 Promoting clinically effective practice: general practitioners' awareness of sources of  
41 research evidence. *Family Practice* 1997; 14:320-323.  
42  
43 34. Jordans C, Hawe P, Irwig L et al. Use of systematic reviews of randomized trials by  
44 Australian neonatologists and obstetricians. *MJA* 1998;168: 267-270.  
45  
46 35. Olatunbosun, O, Edouard L, Pierson R A. Physician's attitudes toward evidence-based  
47 obstetric practice: a questionnaire survey. *BMJ* 1998 Jan; 316:31.  
48  
49 36. Gavvani V. and Mohan V. Physicians' Attitude towards Evidence-Based Medical  
50 Practice and Health Science Library Services. *LIBRES Library and Information Science*  
51 *Research Electronic Journal* 2008;18 (1).  
52  
53  
54  
55  
56  
57  
58  
59  
60

- 1  
2  
3 37. Hanson B, Bhandari M, Audige L, Helfet D. The need for education in evidence-based  
4 orthopaedics. *Acta Orthop Scand* 2004;75 (3):328-332.  
5  
6 38. Poolman R, Sierevelt I, Farrokhyar F et al. Perceptions and competence in evidence-  
7 based medicine: are surgeons getting better? *J Bone Joint Surg Am* 2007;89:206-215.  
8  
9 39. McAlister FA, Graham I, Karr G, Laupacis A. Evidence-based medicine and the  
10 practicing clinician. *J Gen Intern Med* 1999;14:236-242.  
11  
12 40. McCaw B, McGlade K, McElnay J. The impact of the internet on the practice of general  
13 practitioners and community pharmacists in Northern Ireland. *Informatics in primary care*  
14 2007;15:231-7.  
15  
16 41. Carey S, Hall D. Psychiatrists' views of evidence-based practice. *Psychiatric Bulletin*  
17 1999; 23:159-161.  
18  
19 42. Lawrie SM, Scott AIF, Sharpe MC. Evidence-based psychiatry – Do psychiatrists want it  
20 and can they do it? *Health Bulletin* 2000 Jan;58:1.  
21  
22 43. Ciliska D, Hayward S, Dobbins M, Brunton G, Underwood J. Transferring public health  
23 nursing research to health service planning: assessing the relevance and accessibility of  
24 systematic reviews. *Can J Nurs Research* 1999; 31(1):23-36.  
25  
26 44. Hyde C. Who uses the Cochrane Pregnancy and Childbirth Database? *BMJ* 1995;  
27 29:310.  
28  
29 45. Bloom BS. Effects of continuing medical education on improving physician clinical care  
30 and patient health: a review of systematic reviews. *Int J Technol Assess Health Care* 2005;  
31 21(3):380-5.  
32  
33  
34  
35  
36

### Competing interests

All authors declare that they have no conflicting interests.

All authors have completed the Unified Competing Interest form and declare: no support from any organisation for the submitted work; no financial relationships with any organisations that might have an interest in the submitted work in the previous three years, no other relationships or activities that could appear to have influenced the submitted work.

The Corresponding Author has the right to grant on behalf of all authors and does grant on behalf of all authors, an exclusive licence (or non-exclusive for government employees) on a worldwide basis to the BMJ Publishing Group Ltd and its Licensees to permit this article (if accepted) to be published in BMJ editions and any other BMJ PGL products and sublicences to exploit all subsidiary rights, as set out in our licence

**Table 1 Characteristics of included studies**

| Year Published, | Objective | Design and | Participants | Date Conducted |
|-----------------|-----------|------------|--------------|----------------|
|-----------------|-----------|------------|--------------|----------------|

| Country                                                                                     | focus                                                                                                       |                                                                          |                                                            |      |
|---------------------------------------------------------------------------------------------|-------------------------------------------------------------------------------------------------------------|--------------------------------------------------------------------------|------------------------------------------------------------|------|
| 1.<br>Wilson, P.<br>Watt, I.<br>and<br>Hardman, P.<br>2001 <sup>18</sup><br>UK              | To determine attitudes on the importance of effectiveness information                                       | Postal questionnaire<br>Cochrane Library                                 | 338<br>Medical directors                                   | 1999 |
| 2.<br>Paterson<br>-Brown<br>et al.<br>1995 <sup>21</sup><br>UK                              | To establish the availability of meta-analytic overviews and to find out how obstetricians keep up to date. | Telephone survey<br>Oxford Database of Perinatal Trials                  | 98<br>Obstetricians                                        | 1993 |
| 3.<br>Hanson,<br>Bhandari,<br>Audige, .<br>and Helfet,<br>2004 <sup>37</sup><br>Switzerland | To determine current understanding of study methodology and critical appraisal.                             | Questionnaire, self-administered<br>Meta-analysis                        | 532<br>Surgeons and allied professionals from 78 countries | 2002 |
| 4.<br>Poolman<br>et al.<br>2007 <sup>38</sup><br>Holland                                    | They examined perceptions and competence in EBM                                                             | Postal survey<br>Meta-analysis<br>Systematic reviews<br>Cochrane Library | 366<br>Orthopedic Surgeons                                 | 2005 |
| 5.<br>Sur<br>et al.<br>2005 <sup>22</sup><br>USA                                            | Investigated the attitudes of urologists toward EBM                                                         | Web-based survey<br>Cochrane Database of Systematic Reviews              | 714<br>Urologists                                          | 2005 |
| 6.<br>Dahn<br>et al.<br>2009 <sup>29</sup><br>USA                                           | To investigate the attitudes of urologists to EBM                                                           | Mail survey<br>Meta-analyses<br>CDSRs                                    | 889<br>Urologists                                          | 2006 |
| 7.<br>McAlister<br>et al.<br>1999 <sup>39</sup><br>Canada                                   | To assess the attitudes of general internists to EBM.                                                       | Postal Survey<br>Cochrane Database of Systematic Reviews                 | 294<br>Physicians                                          | 1997 |



|                                                       |                                                                             |                                                                                               |                                                                                                                                     |                                                    |           |
|-------------------------------------------------------|-----------------------------------------------------------------------------|-----------------------------------------------------------------------------------------------|-------------------------------------------------------------------------------------------------------------------------------------|----------------------------------------------------|-----------|
| 1<br>2<br>3<br>4<br>5<br>6<br>7<br>8<br>9<br>10<br>11 | <b>8.</b><br>Wilson<br>et al.<br>2001 <sup>19</sup><br>UK                   | To identify current<br>methods of making<br>research evidence<br>accessible                   | Postal survey<br><b>Cochrane Library</b>                                                                                            | 1406<br>General<br>practitioners                   | 1999      |
| 12<br>13<br>14<br>15<br>16<br>17<br>18<br>19          | <b>9.</b><br>Young, J<br>and<br>Ward, J.<br>2001 <sup>15</sup><br>Australia | Examine<br>views<br>about<br>EBM                                                              | Postal Survey and<br>Semi-structured<br>Interviews<br><b>Cochrane Library</b>                                                       | 60<br>GPs                                          | 1999      |
| 20<br>21<br>22<br>23<br>24<br>25<br>26                | <b>10.</b><br>McCaw<br>et al.<br>2007 <sup>40</sup><br>Ireland              | Gain an insight<br>into the use of<br>Internet                                                | Postal survey<br><b>Cochrane Library</b>                                                                                            | 542<br>Community<br>pharmacists (178)<br>GPs (364) | 2005      |
| 27<br>28<br>29<br>30<br>31<br>32<br>33                | <b>11.</b><br>Kerse, N<br>et al.<br>2001 <sup>28</sup><br>NZ                | Access to<br>Internet<br>and<br>Cochrane<br>Library                                           | Cross-sectional<br>postal and fax<br>survey<br><b>Cochrane Library</b>                                                              | 381<br>GPs                                         | 1999-2000 |
| 34<br>35<br>36<br>37<br>38<br>39<br>40<br>41<br>42    | <b>12.</b><br>McColl<br>et al.<br>1998 <sup>17</sup><br>UK                  | To determine the<br>attitude to EBM<br>and perceived<br>usefulness of<br>databases            | Postal questionnaire<br><b>Systematic reviews</b><br><b>Meta-analysis</b><br><b>Cochrane Library</b><br><b>CDSRs</b><br><b>DARE</b> | 302<br>GP principals                               | 1997      |
| 43<br>44<br>45<br>46<br>47<br>48<br>49                | <b>13.</b><br>Bennett<br>et al.<br>2003 <sup>27</sup><br>Australia          | To find out about<br>attitudes to EBP<br>and implementation<br>barriers                       | Postal questionnaire<br><b>Cochrane Library</b>                                                                                     | 649<br>Occupational<br>Therapists                  | 2000      |
| 50<br>51<br>52<br>53<br>54<br>55<br>56                | <b>14.</b><br>Young<br>and Ward<br>1999 <sup>30</sup><br>Australia          | To determine awareness<br>and use of the Cochrane<br>Library and access<br>to the<br>Internet | Postal<br>Questionnaire<br><b>Cochrane Library</b>                                                                                  | 311<br>General practitioners                       | 1997      |
| 57<br>58<br>59<br>60                                  | <b>15.</b><br>Prescott                                                      | To establish the                                                                              | Self-administered,                                                                                                                  | 800                                                | 1996      |



|    |                    |                          |                         |                       |      |
|----|--------------------|--------------------------|-------------------------|-----------------------|------|
| 1  | et al.             | awareness of             | postal questionnaire    | GPs                   |      |
| 2  | 1997 <sup>33</sup> | research evidence        | survey                  |                       |      |
| 3  | UK                 |                          | CDSRs                   |                       |      |
| 4  |                    |                          |                         |                       |      |
| 5  |                    |                          |                         |                       |      |
| 6  |                    |                          |                         |                       |      |
| 7  |                    |                          |                         |                       |      |
| 8  | <b>16.</b>         |                          |                         |                       |      |
| 9  | Jordans            | To determine the         | Cross-sectional         | 224                   | 1995 |
| 10 | et al.             | proportion who           | telephone survey        | neonatologists        |      |
| 11 | 1998 <sup>34</sup> | report using             | obstetricians           |                       |      |
| 12 | Australia          | systematic reviews       | Systematic reviews      |                       |      |
| 13 |                    |                          |                         |                       |      |
| 14 | <b>17.</b>         |                          |                         |                       |      |
| 15 | Ciliska,           | To gain an               | Telephone               | 226                   | NK   |
| 16 | et al.             | understanding of         | questionnaire           | decision makers       |      |
| 17 | 1999 <sup>43</sup> | research needs,          | survey                  | in public health      |      |
| 18 | Canada             | perceptions of barriers  | Systematic reviews      | Included doctors      |      |
| 19 |                    | to research utilisation, |                         |                       |      |
| 20 |                    | and attitudes towards    |                         |                       |      |
| 21 |                    | systematic reviews       |                         |                       |      |
| 22 |                    |                          |                         |                       |      |
| 23 |                    |                          |                         |                       |      |
| 24 |                    |                          |                         |                       |      |
| 25 | <b>18.</b>         |                          |                         |                       |      |
| 26 | Olatunbosun        | To examine               | Self-administered,      | 190 physicians        | 1996 |
| 27 | et al.             | views of                 | two-page                | in obstetric practice |      |
| 28 | 1998 <sup>35</sup> | EBM                      | questionnaire           |                       |      |
| 29 | Canada             |                          | Cochrane Library        |                       |      |
| 30 |                    |                          | Cochrane Pregnancy      |                       |      |
| 31 |                    |                          | And Childbirth Database |                       |      |
| 32 |                    |                          |                         |                       |      |
| 33 | <b>19.</b>         |                          |                         |                       |      |
| 34 | Melnyk             | Describe major           | Limited survey          | 160 nurses            | 2003 |
| 35 | et al.             | barriers                 | CDSRs                   |                       |      |
| 36 | 2004 <sup>32</sup> | and facilitators         |                         |                       |      |
| 37 | USA                | to EBP.                  |                         |                       |      |
| 38 |                    |                          |                         |                       |      |
| 39 | <b>20.</b>         |                          |                         |                       |      |
| 40 | Gavgani, V.        | Directed at              | Survey method           | 98                    | 2008 |
| 41 | and Mohan,         | exploring attitudes      | Cochrane Library        | physicians            |      |
| 42 | 2008 <sup>36</sup> | towards                  | CDSRs                   |                       |      |
| 43 | India.             | EBM                      |                         |                       |      |
| 44 |                    |                          |                         |                       |      |
| 45 |                    |                          |                         |                       |      |
| 46 | <b>21.</b>         |                          |                         |                       |      |
| 47 | Wilson,            | To assess the            | Postal survey           | 1364                  | 2001 |
| 48 | et al.             | awareness and            | questionnaire           | GPs: 441              |      |
| 49 | 2003 <sup>20</sup> | use of NHSnet            | Cochrane Library        | Nurses: 325           |      |
| 50 | UK                 |                          |                         | Practice              |      |
| 51 |                    |                          |                         | Managers: 556         |      |
| 52 |                    |                          |                         |                       |      |
| 53 |                    |                          |                         |                       |      |
| 54 |                    |                          |                         |                       |      |
| 55 | <b>22.</b>         |                          |                         |                       |      |
| 56 | Carey,             | To determine the         | Postal                  | 139                   | 1998 |
| 57 | et al.             | attitudes of towards     | questionnaire           | Psychiatrists         |      |
| 58 | 1999 <sup>41</sup> | the practice of EBM      | Cochrane Library        |                       |      |
| 59 |                    |                          |                         |                       |      |
| 60 |                    |                          |                         |                       |      |

|                                                                  |                                                                                                                           |                                                                                 |                                                   |            |
|------------------------------------------------------------------|---------------------------------------------------------------------------------------------------------------------------|---------------------------------------------------------------------------------|---------------------------------------------------|------------|
| UK                                                               |                                                                                                                           |                                                                                 |                                                   |            |
| <b>23.</b><br>Lawrie<br>et<br>al.<br>2000 <sup>42</sup><br>UK    | To examine attitudes to evidence - based psychiatry                                                                       | Survey, postal<br><b>CDSRs</b>                                                  | 93<br>Senior psychiatrists                        | NK         |
| <b>24.</b><br>Hyde<br>et<br>al.<br>1995 <sup>44</sup><br>UK      | To examine use of Cochrane Pregnancy and Childbirth Database                                                              | Postal survey<br><b>CPCD</b><br><b>Cochrane Library</b>                         | 274 subscribers to CPCD<br>Included doctors       | 1994       |
| <b>25.</b><br>Martis<br>et<br>al.<br>2008 <sup>16</sup><br>Asia  | The aim was to assess current knowledge of evidence-based practice                                                        | Survey, postal<br><b>Reproductive Health Library</b><br><b>Cochrane Library</b> | 660 health care professionals<br>Included doctors | 2005       |
| <b>26.</b><br>Dobbins,<br>et al.<br>2007 <sup>25</sup><br>Canada | The purpose was to identify preferences for the transfer and exchange of research knowledge.                              | Semi-structured interviews<br><b>Systematic reviews</b>                         | 16 Policy decision-makers<br>Included a doctor    | 2001       |
| <b>27.</b><br>Dobbins,<br>et al.<br>2004 <sup>24</sup><br>Canada | To discover public health decision makers' preferences for content, format, and channels for receiving research knowledge | One-hour focus groups<br><b>Systematic reviews</b>                              | 46<br>Policy makers<br>Included doctors           | 2002- 2003 |

**Table 2 Methods and Quality**

| Study               | Sample frame | Response rate | Measurement of use of evidence |
|---------------------|--------------|---------------|--------------------------------|
| <b>1.</b><br>Wilson | Purposive    | (69%)         | Reported use                   |

|    |                    |                          |             |              |
|----|--------------------|--------------------------|-------------|--------------|
| 1  | et                 | sample of                | 338/491     |              |
| 2  | al.                | 491 Medical directors    |             |              |
| 3  | 2001 <sup>18</sup> | Well-described           |             |              |
| 4  |                    | sample                   |             |              |
| 5  | <b>2.</b>          |                          |             |              |
| 6  | Paterson           | Purposive                | (100%)      | Reported     |
| 7  | -Brown             | sample of                | 98/98       | use          |
| 8  | et al.             | 98 obstetricians         |             |              |
| 9  | 1995 <sup>21</sup> | Well-described           |             |              |
| 10 |                    | sample                   |             |              |
| 11 | <b>3.</b>          |                          |             |              |
| 12 | Hanson             | Purposive                | (50%)       | Reported     |
| 13 | et                 | sample of                | 532/1,064   | use          |
| 14 | al.                | 1,064 surgeons/others    |             |              |
| 15 | 2004 <sup>37</sup> | Well-described           |             |              |
| 16 |                    | sample                   |             |              |
| 17 | <b>4.</b>          |                          |             |              |
| 18 | Poolman            | Purposive                | (60%)       | Reported     |
| 19 | et                 | sample of                | 366/611     | use          |
| 20 | al.                | 611 orthopaedic surgeons |             |              |
| 21 | 2007 <sup>38</sup> | Well-described           |             |              |
| 22 |                    |                          |             |              |
| 23 | <b>5.</b>          |                          |             |              |
| 24 | Sur                | Purposive                | (8.8%)      | Reported use |
| 25 | et                 | sample of                | 714/8,100   |              |
| 26 | al.                | 8,100 urologists         |             |              |
| 27 | 2006 <sup>22</sup> | Well-described           |             |              |
| 28 |                    | sample frame             |             |              |
| 29 | <b>6.</b>          |                          |             |              |
| 30 | Dahm               | Random                   | (45%)       | Reported use |
| 31 | et                 | sample of                | 889/2000    |              |
| 32 | al.                | 2000 urologists          |             |              |
| 33 | 2009 <sup>29</sup> | Well-described           |             |              |
| 34 |                    | sample frame             |             |              |
| 35 | <b>7.</b>          |                          |             |              |
| 36 | McAlister          | Purposive                | (59%)       | Reported use |
| 37 | et                 | sample                   | 294/521     |              |
| 38 | al.                | of 294                   |             |              |
| 39 | 1999 <sup>39</sup> | general                  |             |              |
| 40 |                    | Physicians.              |             |              |
| 41 |                    | Well-described           |             |              |
| 42 |                    | sample frame             |             |              |
| 43 | <b>8.</b>          |                          |             |              |
| 44 | Wilson             | Purposive                | (45%)       | Reported use |
| 45 | et                 | sample of                | 1,406/3,087 |              |
| 46 | al.                | 3,087 individuals        |             |              |
| 47 | 2001 <sup>18</sup> | Well-described           |             |              |
| 48 |                    | sample frame             |             |              |
| 49 |                    | Primary care             |             |              |

|                                                                                                 |                                                                     |                                                                                                                         |                           |                     |
|-------------------------------------------------------------------------------------------------|---------------------------------------------------------------------|-------------------------------------------------------------------------------------------------------------------------|---------------------------|---------------------|
| 1<br>2<br>3<br>4<br>5<br>6<br>7<br>8<br>9<br>10<br>11<br>12<br>13<br>14<br>15<br>16<br>17<br>18 | <p><b>9.</b><br/>Young,<br/>and<br/>Ward<br/>2001<sup>15</sup></p>  | <p>Sample of,<br/>60 GPs<br/>Sampling frame<br/>not described</p>                                                       | <p>(100%)<br/>60/60</p>   | <p>Reported use</p> |
| 19                                                                                              | <p><b>10.</b><br/>McCaw<br/>et<br/>al.<br/>2007<sup>40</sup></p>    | <p>Sample of<br/>1081 GPs and<br/>522 pharmacists<br/>Well-described<br/>sample frame</p>                               | <p>(34%)<br/>542/1603</p> | <p>Reported use</p> |
| 20<br>21<br>22<br>23<br>24<br>25<br>26<br>27<br>28<br>29                                        | <p><b>11.</b><br/>Kerse<br/>et al.<br/>2001<sup>28</sup></p>        | <p>Random<br/>Sample<br/>of 459 GPs<br/>Well-described<br/>sample frame</p>                                             | <p>(83%)<br/>381/459</p>  | <p>Reported use</p> |
| 30<br>31<br>32<br>33<br>34<br>35<br>36<br>37                                                    | <p><b>12.</b><br/>McColl<br/>et al.<br/>1998<sup>17</sup></p>       | <p>Random<br/>Sample of<br/>452 GPs<br/>Well-described<br/>sample frame</p>                                             | <p>(63%)<br/>302/452</p>  | <p>Reported use</p> |
| 38<br>39<br>40<br>41<br>42<br>43<br>44<br>45<br>46<br>47                                        | <p><b>13.</b><br/>Bennett<br/>et<br/>al.<br/>2003<sup>27</sup></p>  | <p>Proportional<br/>random sample<br/>of 1491<br/>occupational<br/>therapists<br/>Well-described<br/>sampling frame</p> | <p>(44%)<br/>649/1491</p> | <p>Reported use</p> |
| 48<br>49<br>50<br>51<br>52<br>53<br>54                                                          | <p><b>14.</b><br/>Young<br/>and<br/>Ward,<br/>1999<sup>30</sup></p> | <p>Random sample<br/>of 428 GPs<br/>Well-described<br/>sampling frame</p>                                               | <p>(73%)<br/>311/428</p>  | <p>Reported use</p> |
| 55<br>56<br>57<br>58<br>59<br>60                                                                | <p><b>15.</b><br/>Prescott<br/>et</p>                               | <p>Random<br/>sample</p>                                                                                                | <p>(62%)<br/>501/800</p>  | <p>Reported use</p> |

|    |                    |                        |           |              |
|----|--------------------|------------------------|-----------|--------------|
| 1  | al.                | of 800                 |           |              |
| 2  | 1997 <sup>33</sup> | GPs                    |           |              |
| 3  |                    | Well-described         |           |              |
| 4  |                    | sample frame           |           |              |
| 5  |                    |                        |           |              |
| 6  | <b>16.</b>         |                        |           |              |
| 7  | Jordans            | Random                 | (90%)     | Reported use |
| 8  | et                 | sample                 | 224/248   |              |
| 9  | al.                | of 145 Obstetricians   |           |              |
| 10 | 1998 <sup>34</sup> | and 104 neonatologists |           |              |
| 11 |                    | Well described         |           |              |
| 12 |                    | Sample                 |           |              |
| 13 | <b>17.</b>         |                        |           |              |
| 14 | Ciliska            | 277 who met            | (87%)     | Reported use |
| 15 | et                 | inclusion criteria     | 242/277   |              |
| 16 | al.                | of decision makers     |           |              |
| 17 | 1999 <sup>43</sup> | Well-described         |           |              |
| 18 |                    | sample                 |           |              |
| 19 | <b>18.</b>         |                        |           |              |
| 20 | Olatunbosun        | Random                 | (76%)     | Reported use |
| 21 | et                 | sample of              | 148/190   |              |
| 22 | al.                | 190 family physicians  |           |              |
| 23 | 1998 <sup>35</sup> | and obstetricians      |           |              |
| 24 |                    | Well-described         |           |              |
| 25 |                    | sample                 |           |              |
| 26 | <b>19.</b>         |                        |           |              |
| 27 | Melnyk             | 'Convenient'           | (100%)    | Reported use |
| 28 | et                 | sample                 | 160/1600  |              |
| 29 | al.                | Well described         |           |              |
| 30 | 2004 <sup>32</sup> | sample                 |           |              |
| 31 | <b>20.</b>         |                        |           |              |
| 32 | Gavvani            | Random                 | (65%)     | Reported use |
| 33 | And                | sample                 | 98/150    |              |
| 34 | Mohan,             | Well-described         |           |              |
| 35 | 2008 <sup>36</sup> | sample                 |           |              |
| 36 | <b>21.</b>         |                        |           |              |
| 37 | Wilson             | All GPs in             | (44%)     | Reported use |
| 38 | et                 | defined area.          | 1364/3090 |              |
| 39 | al.                | Well-described         |           |              |
| 40 | 2003 <sup>20</sup> | sample                 |           |              |
| 41 | <b>22.</b>         |                        |           |              |
| 42 | Carey              | All psychiatrists      | (64%)     | Reported use |
| 43 | and                | in a defined area      | 139/216   |              |
| 44 | Hall,              | Well-defined sample    |           |              |

|                                            |                                                        |                                                                        |              |
|--------------------------------------------|--------------------------------------------------------|------------------------------------------------------------------------|--------------|
| 1999 <sup>41</sup>                         |                                                        |                                                                        |              |
| <b>23.</b>                                 |                                                        |                                                                        |              |
| Lawrie<br>et<br>al.<br>2000 <sup>42</sup>  | All in a<br>defined area<br>Well-described<br>sample   | (76%)<br>93/123<br>but just 22/123 (17%)<br>contributed to this review | Reported use |
| <b>24.</b>                                 |                                                        |                                                                        |              |
| Hyde<br>et<br>al.<br>1995 <sup>44</sup>    | All subscribers<br>to CPCD<br>Well-described<br>sample | 71%<br>274/387                                                         | Reported use |
| <b>25.</b>                                 |                                                        |                                                                        |              |
| Martis<br>et<br>al.<br>2008 <sup>16</sup>  | All in a<br>defined area<br>Well-described<br>sample   | NK                                                                     | Reported use |
| <b>26.</b>                                 |                                                        |                                                                        |              |
| Dobbins<br>et<br>al.<br>2004 <sup>24</sup> | Purposeful<br>sample<br>Well-described<br>sample       | 46/60 (77%)                                                            | Reported use |
| <b>27.</b>                                 |                                                        |                                                                        |              |
| Dobbins<br>et<br>al.<br>2007 <sup>25</sup> | Purposeful<br>sample<br>Well-described<br>sample       | 16/NK                                                                  | Reported use |

**Table 3. Barrier Descriptive Findings**

| Barrier category          | Barrier Descriptive                                                                                                                                                                                                                                                                                                                                                                                                              |
|---------------------------|----------------------------------------------------------------------------------------------------------------------------------------------------------------------------------------------------------------------------------------------------------------------------------------------------------------------------------------------------------------------------------------------------------------------------------|
| <i>Knowledge barriers</i> | Eleven studies measured lack of awareness as a possible barrier. The percentage of respondents reporting lack of awareness as a barrier was as high as 82% and as low as 1%, with a median of 55%. Eleven surveys measured lack of access as a possible barrier. The percentage of respondents identifying lack of access as a barrier was as high as 95% and as low as 3%, with a median of 55%. Seven surveys measured lack of |

familiarity as a possible barrier. The percentage of respondents suggesting lack of familiarity as a barrier was as high as 98 and as low as 19%, with a median of 70%.

*Attitudinal barriers* Seven surveys measured lack of perceived usefulness as a possible barrier. The percentage of respondents identifying lack of usefulness as a barrier was as high as 95% and as low as 7%, with a median of 16.5%. Four studies measured lack of motivation as a possible barrier. The percentage of respondents identifying this barrier was as high as 10% and as low as 2% with a median of 3.6%.

*Behaviour barriers* Five studies investigated 10 external barriers to review uptake. More than 10% of respondents cited lack of resources, lack of positive policy climate, lack of workshop attendance, and lack of training as possible environmental barriers. Fourteen surveys looked at lack of use of systematic reviews. The percentage of respondents reporting lack of use was as high as 99% and as low as 18% with a median of 78%.

#### **Table 4. Excluded studies**

Lavis, John. Research, Public Policymaking and Knowledge-translation Processes. *Journal of Continuing Education in the Health Professions*. 2006 26. 37-45. Not a survey, focus group or interview, or an intervention.

Glasziou P, Guyatt GH, Dans AL, Straus S, Sackett DL. Applying the results of trials and systematic reviews to individual patients. *Evidence-Based Medicine* 1998 3(6). 165-6. Not a survey, focus group or interview study, or an intervention.

Grimshaw J, Santesso N, Cumston M, Mayhew A, McGowen J. Knowledge for knowledge translation: the role of the Cochrane Collaboration. *HLWIKA* 2006 26(1): 55-62. Not a survey, focus group or interview study, or an intervention.

Lavis J, Davies H, Gruen R, Walshe K, Farquhar CM. Working within and beyond the Cochrane Collaboration to make systematic reviews more useful to healthcare managers and policy makers. *Health Policy* 2006 1(2): 21-33. Not a survey, focus group or interview study, or an intervention.

Dobbins M, Ciliska D, Cockerill R, Barnsley J, DiCenso A. A framework for the dissemination and utilisation of research for healthcare policy and practice. *J Know Synth Nurs* 2002 18;9:7. Not a survey, focus group or interview study, or an intervention.

Petticrew M, Whitehead M, Macintyre SJ, Graham H, Egan M. Evidence for public health policies on inequalities. *Journal of Epidemiological Community Health*. 2004 58:811-6. Not specifically related to systematic reviews.

Silagy CA, Weller DP, Middleton PF and Doust JA. General practitioners' use of evidence databases. *Med J Aust*. 1999 April 19;170(8):393  
A comment on previous studies.

Sheldon T. Making evidence synthesis more useful for management and policy making. *J Health Serv Res Policy*. 2005 Vol 10, Suppl 1, July



An essay, not a survey, focus group, or an interview, or an intervention.

Gruen R, Morris P, McDonald E and Bailie. Making systematic reviews more useful for policy makers. Bulletin of the World Health Organization. 2005 June, 83(6). A letter/essay.

Melnyk B, Fineout-Overholt E, Feinstein N, Sadler L, Hernandez C. Nurse Practitioner Educators' Perceived Knowledge, Beliefs and Teaching Strategies Regarding Evidence-Based Practice: Implications for Accelerating the Integration of Evidence-based Practice into Graduate Programmes. Journal of Professional Nursing, 2008 Vol 24, Issue 1, p 7-13. Does not address systematic reviews.

Volmink J, Siegfried N, Robertson K and Gulmezoglu M. Research Synthesis and Dissemination as a Bridge to Knowledge Management: the Cochrane Collaboration. Bulletin of the World Health Organisation 2004 82: 778-783. An essay. Not a survey, a focus group, an interview, or an intervention.

Mayer J, and Pitman L. The Attitudes of Australian GPs to Evidence-based Medicine: a Focus Group Study. Family Practice 1999 16: 627-632. Does not address systematic reviews.

Cranney M and Walley T. Same information, different decisions: the influence of evidence on the management of hypertension in the elderly. The British Journal of General Practice 1996 46(412): 661-663. Not specifically about systematic reviews.

**Table 5. PubMed** was searched from December 2010 to June 2012 using the advanced search facility

| Search | Query                                                               | Items found |
|--------|---------------------------------------------------------------------|-------------|
| 1      | systematic review AND barriers AND knowledge uptake                 | 1           |
| 2      | meta-analysis AND barriers AND knowledge uptake                     | 1           |
| 3      | systematic review AND obstacles AND knowledge uptake                | 1           |
| 4      | meta-analysis AND obstacles AND knowledge uptake                    | 0           |
| 5      | systematic review AND barriers AND knowledge utilisation            | 3           |
| 6      | meta-analysis AND barriers and knowledge utilisation                | 2           |
| 7      | systematic review AND obstacles AND knowledge utilisation           | 0           |
| 8      | meta-analysis AND obstacle AND knowledge utilisation                | 0           |
| 9      | overview* OR review* AND impairment* AND knowledge translation      | 13          |
| 10     | systematic review* OR meta-analys* AND barrier* AND decision making | 16          |

**37 citations were returned, none of which met inclusion criteria**

**Table 6. Embase** was searched from December 2010 to June 2012 using the advanced search facility

| Search | Query                                                | Items found |
|--------|------------------------------------------------------|-------------|
| 1      | systematic review AND barriers AND knowledge uptake  | 14          |
| 2      | meta-analysis AND barriers AND knowledge uptake      | 5           |
| 3      | systematic review AND obstacles AND knowledge uptake | 0           |
| 4      | meta-analysis AND obstacles AND knowledge uptake     | 0           |

|                                                                                             |                                                                     |    |
|---------------------------------------------------------------------------------------------|---------------------------------------------------------------------|----|
| 5                                                                                           | systematic review AND barriers AND knowledge utilisation            | 14 |
| 6                                                                                           | meta-analysis AND barriers and knowledge utilisation                | 0  |
| 7                                                                                           | systematic review AND obstacles AND knowledge utilisation           | 0  |
| 8                                                                                           | meta-analysis AND obstacle AND knowledge utilisation                | 0  |
| 9                                                                                           | overview* OR review* AND impairment* AND knowledge translation      | 0  |
| 10                                                                                          | systematic review* OR meta-analys* AND barrier* AND decision making | 0  |
| 32 citations were returned, 1 full text article retrieved, no report met inclusion criteria |                                                                     |    |

#### Table 7. Disciplines participating

Doctors: 6,549  
 Nurses: 1,494  
 Practice managers: 785  
 Occupational therapists: 649  
 Midwives: 202  
 Pharmacists: 178  
 General practice staff: 91  
 Surgical allied professions: 69  
 Policy makers: 62  
 Information specialists: 56  
 Others: 83

**Total: 10,218**

#### TABLE 8: Number of barriers investigated by each study to uptake of evidence from systematic reviews, meta-analyses, and the databases containing them

| Surveys                      | Number of barriers addressed by each study      |
|------------------------------|-------------------------------------------------|
| Wilson et al. (2001)         | 4: lack of access, awareness, use, and training |
| Paterson-Brown et al. (1995) | 2: lack of access, awareness                    |
| Hanson et al. (2004)         | 2: lack of trust, training                      |
| Poolman et al. (2007)        | 2: lack of understanding, use                   |
| Sur et al. (2006)            | 3: Lack of awareness, use, and understanding    |
| Dahm et al. (2009)           | 3: Lack of awareness, use, and understanding,   |
| McAlister et al. (1999)      | 1: Lack of use                                  |
| Wilson et al. (2001)         | 1: Lack of access                               |
| Ward and Young (2001)        | 3: Lack of access, understanding, usefulness,   |
| McCaw et al. (2007)          | 1: Lack of use                                  |
| Kerse et al. (2001)          | 3: Lack of access, awareness, use               |
| McCull et al. (1998)         | 3: Lack of awareness, access, and understanding |
| Bennett et al. (2001)        | 1: Lack of confidence                           |
| Young and Ward (1999)        | 3: Lack of awareness, access, use               |
| Paterson-Brown (1993)        | 3: Lack of awareness, availability, and need    |
| Prescott et al. (1999)       | 2. Lack of use, awareness                       |

|                             |                                                                                                                               |
|-----------------------------|-------------------------------------------------------------------------------------------------------------------------------|
| Jordan et al. (1999)        | 3: Lack of use, awareness, access                                                                                             |
| Ciliska et al. (1999)       | 4: Lack of awareness, use, policy climate, resources                                                                          |
| Olatunbosun et al. (1998)   | 1: Lack of access                                                                                                             |
| Melnyk et al. (2004)        | 1: Lack of use                                                                                                                |
| Gavgani et al. (2008)       | 2: Lack of use, usefulness                                                                                                    |
| Wilson et al. (2003)        | 4: Lack of access, awareness, use, and training                                                                               |
| Carey and Hall, (1999)      | 1: Access                                                                                                                     |
| Lawrie et al. (2000)        | 1: Ability to search                                                                                                          |
| Hyde et al. (1995)          | 1: Ability to search                                                                                                          |
| Martis et al. (2008)        | 5: Lack of access, awareness, use, usefulness, training,                                                                      |
| <b>Qualitative studies:</b> |                                                                                                                               |
| Dobbins et al. (2004)       | 2: Lack of access, training                                                                                                   |
| Dobbins et al. (2007)       | 4: Lack of relevance, implications, implementation strategies, understanding of the information needs of the target audience. |
| Wilson et al. (2001)        | 7. Limited range, access, focus, use, up-datedness, promotion and time                                                        |

## PROTOCOL

### Barriers to uptake of evidence from systematic reviews and meta-analyses: a systematic review of decision makers' perceptions

**Authors:** John Wallace, Bosah Nwosu, and Mike Clarke

#### Abstract

This is the protocol for a systematic review. The objectives are as follows:

1. To review all studies identifying barriers to uptake of evidence from systematic reviews, meta-analyses and the databases associated with them.
2. To assess the methodological quality of these studies.
3. To perform a systematic review of the evidence in this area.

#### Background

The slow and haphazard process of translating research findings into clinical practice compromises the potential benefits of clinical research. The need for effective knowledge transfer in clinical practice is essential. However, to date, there is a consensus among the research community that most efforts in knowledge translation at a clinical level have met with little success.<sup>1</sup>

A systematic review is a review of a clearly formulated question that uses systematic and explicit methods to identify, select and critically appraise relevant research, and to collect and analyse data from studies that are included in the review.<sup>2</sup> The increased uptake of evidence from systematic reviews is advocated because of their potential to improve the quality of decision making for patient care. Systematic reviews can do this by decreasing inappropriate clinical variation and quickly expediting the application of current, effective advances to everyday practice. However, research suggests that evidence from systematic reviews has not been widely adopted by health professionals. Increasing uptake of systematic reviews and

1  
2  
3 improving awareness of the advantages that the technique can bring to the field of healthcare  
4 is a major challenge.

5  
6 Barriers are factors that limit or restrict uptake of research evidence in clinical practice.<sup>3</sup>  
7 Implementation researchers, educators, policy makers, and clinicians want to know the  
8 identity of barriers to knowledge use in healthcare contexts and also how to address them.  
9 There are specific challenges associated with the assessment of barriers. Many lessons have  
10 been learned from previous research in this area on how to address barriers to knowledge use.  
11 Cabana and colleagues identified a variety of barriers to physician adherence to clinical  
12 practice guidelines and they organised the barriers in terms of their impact on knowledge,  
13 attitudes, and physician behaviour.<sup>3</sup>

14  
15  
16 **Context:** Despite wide promulgation, systematic reviews have had limited effect on changing  
17 decision makers' behaviour. Little is known about the process and factors inhibiting the  
18 uptake of knowledge in response to exposure to a systematic review.

19  
20  
21 **Objective:** To identify barriers to evidence uptake from systematic reviews, meta-analyses,  
22 and their associated databases.

#### 23 24 **Search methods for identification of studies**

25 The Cochrane Library, Medline, Embase, PsycInfo, and other electronic resources, nineteen  
26 in total, will be searched, with a special emphasis on grey literature and knowledge  
27 translation research. The reference lists from primary studies identified will be searched and  
28 also the references from related overviews. The reviewers will identify additional candidate  
29 articles by reviewing the bibliographies of articles retrieved from the search. Experts in the  
30 field will be contacted. Terms to be used will include systematic reviews, overviews, meta-  
31 analysis, and reviews. Other search terms utilised will be barriers, obstacles, impairments,  
32 knowledge translation, knowledge uptake, knowledge utilisation, and decision making.

#### 33 34 35 **Data collection and analysis**

36 Articles will be included that examined at least one barrier to knowledge uptake from  
37 systematic reviews, meta-analyses, or the databases that contain them. A barrier will be  
38 defined as any factor that limits or restricts complete knowledge uptake from an overview. It  
39 is proposed to focus on barriers that could be changed by an intervention rather than age or  
40 gender. Respondents can identify barriers via responses to survey questions. For qualitative  
41 studies, major themes from focus groups or interviews could also identify barriers. All  
42 decision makers will be included.

43  
44  
45 One investigator (JW) will screen titles and abstracts, and full bibliographic citations to  
46 identify candidate articles. Two investigators (JW and BN) will then independently review  
47 the full text to exclude articles that will not meet the inclusion criteria. Differences will be  
48 resolved by discussion and consensus.

#### 49 50 51 **Data Extraction:**

52 Data extraction will follow three steps. Firstly, two investigators will abstract the following  
53 information from each article: description of the barrier, the percentage of respondents  
54 describing the barrier, demographics of the respondents, and also study characteristics  
55 including sample size and response rate. Differences will be resolved by discussion and  
56 consensus. Secondly, the barriers will be grouped into common themes. Thirdly, the barriers  
57 will be organised into groups based on the knowledge, attitudes, behaviour framework.<sup>4</sup>

1  
2  
3 Before an integrative review can affect patient outcomes, it must first affect health  
4 professional knowledge, then attitudes, and finally behaviour. Factors impacting on  
5 cognition, affect and behaviour will be considered as potential barriers. A survey will be  
6 defined as having at least one question to a group about potential barriers to knowledge  
7 uptake from a systematic review, a meta-analysis, or the databases containing them.  
8

### 9 10 **Assessment of risk of bias**

11 Important flaws in individual studies such as a lack of random selection of participants,  
12 inadequate description of the sample frame, and a poor response rate will be described. For  
13 purposes of quality assessment, study characteristics will be extracted by two investigators:  
14 country of origin, year of publication, main objective of the study, design of the study,  
15 characteristics of participants, sampling strategy, response rate, and methodological  
16 approach, including data collection strategies. Differences in assessment of risk of bias will  
17 be resolved by consensus or consultation with a third party (MC). Publication bias will be  
18 minimised by the extensive search strategy.  
19

### 20 21 **Synthesis**

22 We intend to bring together findings from different study designs within different methods  
23 and approaches. It is not expected that it will be possible to carry out a meta-analysis due to  
24 the high degree of anticipated heterogeneity across settings, participants, and data collection  
25 methods. A narrative synthesis with appropriate tabulation is anticipated.  
26

27 The type of barrier will be tabulated, together with the comprehensiveness of surveys. How  
28 often surveys considered the full variety of barriers to knowledge uptake will be indicated.  
29 The number and characteristics of the surveys examining each barrier will be documented.  
30 The targeted populations and their location will be identified. The sample size, method of  
31 selection, and response rate will also be reported. The percentage of respondents identifying a  
32 particular barrier will also be listed. Tables will be completed outlining the study  
33 characteristics, methods and results.  
34

35 Evidence synthesis is a process of combining evidence from individual studies to create a  
36 new understanding by comparing and analysing concepts and findings from different sources  
37 of evidence with a focus on the same topic of interest. The aim is to identify and extract  
38 evidence, categorise the evidence, and combine the categories to develop synthesized  
39 findings. The overall objective is to build an explanation of why people do not use knowledge  
40 from systematic reviews.  
41

42 Excluded studies will be listed in a 'Characteristics of excluded studies' table with a succinct  
43 summary of why studies were excluded. On-going studies and studies awaiting classification  
44 if found will be listed.  
45

46 A summary of the main results will be reported together with an assessment of the overall  
47 completeness and applicability of the evidence, together with key methodological limitations.  
48

49 **Aim:** We are interested in improving the relevance and utility of systematic reviews. The aim  
50 of the review outlined here is to identify barriers to uptake of evidence from systematic  
51 reviews and meta-analyses. The objective is also to offer a differential diagnosis for why  
52 decision makers do not use knowledge from systematic reviews as well as providing a  
53 rational strategy aimed at improving knowledge uptake from this important source of pre-  
54 appraised, integrated evidence, together with a frame work for future research.  
55  
56  
57  
58  
59  
60

**Potential conflict of interest**

None known

**Sources of support**

No internal or external sources of support supplied

**Contact address**

Dr John Wallace,  
Rewley House,  
1 Wellington Square,  
University of Oxford,  
Oxford OX1 2JA, UK

**REFERENCES**

1. Grimshaw JM, Thomas RE, MacLennan G, Fraser C, Ramsay CR, Vale L, et al. Effectiveness and efficiency of guideline dissemination and implementation strategies. *Health Technol Assess* 2004;8(6).
2. Sackett D, Rosenberg WC, Muir Gray JA, Haynes R B, and Richardson WS. Evidence based medicine: what it is and what it isn't. *BMJ* 1996; 312: 71.
3. Cabana M, Rand CS, Powe NR, Wu AW, Wilson MH, Abboud PAC, Rubin HR. Why don't physicians follow clinical practice guidelines? A framework for improvement. *JAMA* 1999; 282(15):1458-1465.
4. Woolf SH. Practice guidelines: a new reality in medicine, III: impact on patient care. *Arch Intern Med.* 1993;153: 2646-2655.



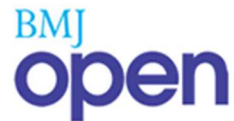

**Barriers to uptake of evidence from systematic reviews and meta-analyses: a systematic review of decision makers' perceptions**

|                                 |                                                                                                                                                                                                                                                                                |
|---------------------------------|--------------------------------------------------------------------------------------------------------------------------------------------------------------------------------------------------------------------------------------------------------------------------------|
| Journal:                        | <i>BMJ Open</i>                                                                                                                                                                                                                                                                |
| Manuscript ID:                  | bmjopen-2012-001220.R2                                                                                                                                                                                                                                                         |
| Article Type:                   | Research                                                                                                                                                                                                                                                                       |
| Date Submitted by the Author:   | 27-Jul-2012                                                                                                                                                                                                                                                                    |
| Complete List of Authors:       | Wallace, John; University of Oxford, DPhil international programme in evidence-based health care<br>Nwosu, Bosah; Royal College of Surgeons in Ireland, First Episode Psychosis Study<br>Clarke, Mike; Queen's University, MRC all-Ireland Hub for Trials Methodology Research |
| <b>Primary Subject Heading</b>: | Evidence based practice                                                                                                                                                                                                                                                        |
| Secondary Subject Heading:      | Medical education and training                                                                                                                                                                                                                                                 |
| Keywords:                       | MEDICAL EDUCATION & TRAINING, QUALITATIVE RESEARCH, Information management < BIOTECHNOLOGY & BIOINFORMATICS, Quality in health care < HEALTH SERVICES ADMINISTRATION & MANAGEMENT                                                                                              |
|                                 |                                                                                                                                                                                                                                                                                |

SCHOLARONE™  
Manuscripts

only

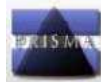

# PRISMA 2009 Checklist

| Section/topic                      | #  | Checklist item                                                                                                                                                                                                                                                                                              | Reported on page # |
|------------------------------------|----|-------------------------------------------------------------------------------------------------------------------------------------------------------------------------------------------------------------------------------------------------------------------------------------------------------------|--------------------|
| <b>TITLE</b>                       |    |                                                                                                                                                                                                                                                                                                             |                    |
| Title                              | 1  | Identify the report as a systematic review, meta-analysis, or both.                                                                                                                                                                                                                                         | 1                  |
| <b>ABSTRACT</b>                    |    |                                                                                                                                                                                                                                                                                                             |                    |
| Structured summary                 | 2  | Provide a structured summary including, as applicable: background; objectives; data sources; study eligibility criteria, participants, and interventions; study appraisal and synthesis methods; results; limitations; conclusions and implications of key findings; systematic review registration number. | 1                  |
| <b>INTRODUCTION</b>                |    |                                                                                                                                                                                                                                                                                                             |                    |
| Rationale                          | 3  | Describe the rationale for the review in the context of what is already known.                                                                                                                                                                                                                              | 2                  |
| Objectives                         | 4  | Provide an explicit statement of questions being addressed with reference to participants, interventions, comparisons, outcomes, and study design (PICOS).                                                                                                                                                  | 3                  |
| <b>METHODS</b>                     |    |                                                                                                                                                                                                                                                                                                             |                    |
| Protocol and registration          | 5  | Indicate if a review protocol exists, if and where it can be accessed (e.g., Web address), and, if available, provide registration information including registration number.                                                                                                                               | 22                 |
| Eligibility criteria               | 6  | Specify study characteristics (e.g., PICOS, length of follow-up) and report characteristics (e.g., years considered, language, publication status) used as criteria for eligibility, giving rationale.                                                                                                      | 3                  |
| Information sources                | 7  | Describe all information sources (e.g., databases with dates of coverage, contact with study authors to identify additional studies) in the search and date last searched.                                                                                                                                  | 3                  |
| Search                             | 8  | Present full electronic search strategy for at least one database, including any limits used, such that it could be repeated.                                                                                                                                                                               | 3                  |
| Study selection                    | 9  | State the process for selecting studies (i.e., screening, eligibility, included in systematic review, and, if applicable, included in the meta-analysis).                                                                                                                                                   | 3                  |
| Data collection process            | 10 | Describe method of data extraction from reports (e.g., piloted forms, independently, in duplicate) and any processes for obtaining and confirming data from investigators.                                                                                                                                  | 3                  |
| Data items                         | 11 | List and define all variables for which data were sought (e.g., PICOS, funding sources) and any assumptions and simplifications made.                                                                                                                                                                       | 4                  |
| Risk of bias in individual studies | 12 | Describe methods used for assessing risk of bias of individual studies (including specification of whether this was done at the study or outcome level), and how this information is to be used in any data synthesis.                                                                                      | 4                  |
| Summary measures                   | 13 | State the principal summary measures (e.g., risk ratio, difference in means).                                                                                                                                                                                                                               | 6                  |
| Synthesis of results               | 14 | Describe the methods of handling data and combining results of studies, if done, including measures of consistency (e.g., $I^2$ for each meta-analysis).                                                                                                                                                    | 6                  |

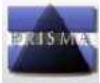

# PRISMA 2009 Checklist

Page 1 of 2

| Section/topic                 | #  | Checklist item                                                                                                                                                                                           | Reported on page # |
|-------------------------------|----|----------------------------------------------------------------------------------------------------------------------------------------------------------------------------------------------------------|--------------------|
| Risk of bias across studies   | 15 | Specify any assessment of risk of bias that may affect the cumulative evidence (e.g., publication bias, selective reporting within studies).                                                             | 6                  |
| Additional analyses           | 16 | Describe methods of additional analyses (e.g., sensitivity or subgroup analyses, meta-regression), if done, indicating which were pre-specified.                                                         | -                  |
| <b>RESULTS</b>                |    |                                                                                                                                                                                                          |                    |
| Study selection               | 17 | Give numbers of studies screened, assessed for eligibility, and included in the review, with reasons for exclusions at each stage, ideally with a flow diagram.                                          | 5                  |
| Study characteristics         | 18 | For each study, present characteristics for which data were extracted (e.g., study size, PICOS, follow-up period) and provide the citations.                                                             | 6                  |
| Risk of bias within studies   | 19 | Present data on risk of bias of each study and, if available, any outcome level assessment (see item 12).                                                                                                | Table 2            |
| Results of individual studies | 20 | For all outcomes considered (benefits or harms), present, for each study: (a) simple summary data for each intervention group (b) effect estimates and confidence intervals, ideally with a forest plot. | Table 3            |
| Synthesis of results          | 21 | Present results of each meta-analysis done, including confidence intervals and measures of consistency.                                                                                                  | 6                  |
| Risk of bias across studies   | 22 | Present results of any assessment of risk of bias across studies (see Item 15).                                                                                                                          | 6                  |
| Additional analysis           | 23 | Give results of additional analyses, if done (e.g., sensitivity or subgroup analyses, meta-regression [see Item 16]).                                                                                    | -                  |
| <b>DISCUSSION</b>             |    |                                                                                                                                                                                                          |                    |
| Summary of evidence           | 24 | Summarize the main findings including the strength of evidence for each main outcome; consider their relevance to key groups (e.g., healthcare providers, users, and policy makers).                     | 8                  |
| Limitations                   | 25 | Discuss limitations at study and outcome level (e.g., risk of bias), and at review-level (e.g., incomplete retrieval of identified research, reporting bias).                                            | 9                  |
| Conclusions                   | 26 | Provide a general interpretation of the results in the context of other evidence, and implications for future research.                                                                                  | 9                  |
| <b>FUNDING</b>                |    |                                                                                                                                                                                                          |                    |
| Funding                       | 27 | Describe sources of funding for the systematic review and other support (e.g., supply of data); role of funders for the systematic review.                                                               | 13                 |

From: Moher D, Liberati A, Tetzlaff J, Altman DG, The PRISMA Group (2009). Preferred Reporting Items for Systematic Reviews and Meta-Analyses: The PRISMA Statement. PLoS Med 6(6): e1000097. doi:10.1371/journal.pmed1000097

For more information, visit: [www.prisma-statement.org](http://www.prisma-statement.org).

Page 2 of 2

For peer review only - <http://bmjopen.bmj.com/site/about/guidelines.xhtml>

## Barriers to uptake of evidence from systematic reviews and meta-analyses: a systematic review of decision makers' perceptions

**Authors:** John Wallace, Bosah Nwosu, and Mike Clarke

### ABSTRACT

**Objective:** To review the barriers to the uptake of research evidence from systematic reviews by decision makers.

**Search strategy:** We searched 19 databases covering the full range of publication years, utilised three search engines, and also personally contacted investigators. Reference lists of primary studies and related reviews were also consulted.

**Selection criteria:** Studies were included if they reported on the views and perceptions of decision makers on the uptake of evidence from systematic reviews, meta-analyses, and the databases associated with them. All study designs, settings, and decision makers were included. One investigator screened titles to identify candidate articles then two reviewers independently assessed the quality and the relevance of retrieved reports.

**Data extraction:** Two reviewers described the methods of included studies and extracted data that were summarised in tables and then analysed. Using a pre-established taxonomy, the barriers were organized into a framework according to their effect on knowledge, attitudes, or behaviour.

**Results:** Of 1,726 articles initially identified, we selected 27 unique published studies describing at least 1 barrier to the uptake of evidence from **systematic reviews**. These studies included a total of 25 surveys and 2 qualitative studies. Overall, the majority of participants (n=10,218) were physicians (64%). The most commonly investigated barriers were lack of use (14/25), lack of awareness (12/25), lack of access (11/25), lack of familiarity (7/25), lack of usefulness (7/25), lack of motivation (4/25), and external barriers (5/25).

**Conclusion:** This systematic review reveals that strategies to improve uptake of evidence from reviews and meta-analyses will need to overcome a wide variety of obstacles. Our review describes the reasons why knowledge users, especially physicians, do not call on systematic reviews. This study can inform future approaches to enhancing systematic review uptake and also suggests potential avenues for future investigation.

## INTRODUCTION

Many researchers are worried about the extent to which research knowledge is utilised.<sup>1</sup> An important finding from health research is the limited success in routinely transferring research knowledge into clinical practice. Tackling the knowledge-to-practice deficit is challenging and entails an investigation of the numerous obstacles to knowledge uptake.<sup>2</sup>

The transfer of important clinical knowledge is impeded by the amount and also the on-going growth of the biomedical literature. **Systematic reviews** diminish this problem. A systematic review is a review of ‘a clearly formulated question that uses systematic and explicit methods to identify, select and critically appraise relevant research, and to collect and analyse data from studies that are included in the review’.<sup>3</sup> The contribution of systematic reviews to the research literature is seen in a range of bibliographic databases such as The Cochrane Library.

**A systematic review that integrates** the findings of discrete studies against the background of global evidence can be considered the basic unit of evidence transfer.<sup>4</sup> Synthesis should help with policy formulation, the development of clinical practice guidelines, as well as informing routine decision making in clinical practice. Failure to use the findings from systematic reviews and meta-analyses can reduce healthcare efficiency and compromise quality of life.

However, the mere existence of reviews does not ensure their dissemination and their application to routine practice and policy formulation. **The uptake of evidence from systematic reviews has been inconsistent.**<sup>4</sup> **When unsure about diagnostic and management issues, physicians routinely consult with a colleague or read a text.**<sup>5</sup>

While many investigations have been conducted on the barriers to the uptake of research evidence in general, little is known specifically about the determinants of uptake of systematic review evidence in particular. In the past, there have been reviews of the barriers to adherence to clinical guidelines,<sup>6</sup> of the barriers to the appropriate use of research evidence in policy decisions,<sup>1</sup> of the barriers and facilitators to implementing shared decision-making,<sup>7</sup> of the barriers to improving the usefulness of systematic reviews for health care managers and policy makers,<sup>8</sup> and lastly, of the barriers and incentives to optimal health care.<sup>9</sup>

**Systematic reviews were the focus of this investigation, rather than the more commonly investigated clinical practice guidelines or indeed individual, primary studies. Systematic reviews are based on primary research while clinical practice guidelines are an amalgam of clinical experience, expert opinion, patient preferences, and evidence. Systematic reviews are a scientific exercise aimed at generating new knowledge and they provide a summary of relevant primary research. In this way, they can help keep us current. Systematic reviews have a distinct development and scientific purpose that differs from both guidelines and primary research.**

**Many factors contribute to the varying uptake of evidence in general.**<sup>10</sup> **These include financial obstacles, the sheer volume of research evidence, and the difficulties in applying global evidence in a local clinical context.**<sup>11</sup> **Other barriers include limited time and impaired awareness of evidence sources, limited critical appraisal skills and the limited relevance of research findings.**<sup>12</sup> **Given the considerable differences between systematic reviews, primary**

research, and clinical practice guidelines, we set out specifically to identify the barriers to uptake of systematic reviews and meta-analyses.

What are the barriers to the uptake of evidence from systematic reviews, meta-analyses and the databases that contain them? Here we were concerned with all decision makers, including physicians, policy makers, patients and nursing staff. Such barrier identification can aid the development of effective strategies to improve the uptake of systematic reviews and meta-analyses by decision makers. Interventions to improve the use of systematic reviews for clinical and commissioning decision making are currently being investigated.<sup>11</sup>

## Methods

### *Search strategy*

We conducted a systematic review of the literature to identify barriers to evidence uptake from systematic reviews and meta-analyses. The primary researcher (JW) searched 19 databases and used 3 search engines, for articles, not limited to the English language, drawing on the entire range of publication years covered in each database up to Dec 2010 using a combination of index terms and text words identified from previously identified, relevant articles. The databases included The Cochrane Library, TRIP, Joanna Biggs I.N.G, National Guideline Clearing House, Health Evidence, PubMed (1950-2010), EMBASE (1980-2010), ERIC, CINAHL, PsycInfo, OpenSigle, Index to Theses in Great Britain and Ireland, and Conference Papers Index. Campbell Collaboration, Canadian Health Services Research Foundation, EPOC, KT+, McMaster University, Keenan Research Centre, and the New York Academy of Medicine. The search engines ALTA VISTA and Google scholar were also utilised. References from included primary studies and related review articles were scanned, experts in the field contacted, and bibliographies of textbooks were reviewed. The following search terms were included: obstacle, barrier, impede, utilisation, uptake, systematic review and meta-analysis.

We repeated aspects of the search for the period December 2010 to June 2012. The aim was to identify any further relevant or on-going studies to be included in 'Studies awaiting classification' or 'On-going studies' that could be used in a later update of this systematic review. We applied similar search strategies to PubMed and EMBASE, the two most productive bibliographic databases in terms of studies already identified for inclusion in the review.

### *Selection criteria*

We included studies if they presented an original collection of data. Studies containing interviews, focus groups and surveys with all decision makers, such as doctors, nurses, occupational therapists, policy makers and patients, were eligible. Selection criteria did not specify that the inclusion of studies was restricted to those reporting, as their main purpose, the identification of obstacles specifically to systematic review uptake. No study design or language was excluded. Studies were included if they addressed perceived barriers to uptake of evidence specifically from systematic reviews, meta-analyses and the databases that contained them such as The Cochrane Library, The Cochrane Database of Systematic Reviews, Database of Abstracts of Reviews of Effects, Cochrane Pregnancy and Childbirth Database, Oxford Database of Perinatal Trials, and the Reproductive Health Library.

A barrier was defined as any factor that impedes or obstructs uptake of evidence from systematic reviews. Barriers to evidence uptake can negatively impact on access, awareness, familiarity, intellectual adoption, and actual use of systematic reviews. Barriers can also limit



1  
2  
3 the positive influence of current systematic review results on patient care. We focused on  
4 factors that could be altered or overcome rather than the gender or age of decision makers.<sup>6</sup>  
5 In many of the reports, participants specified obstacles via response to survey questions. For  
6 qualitative studies, major themes from focus groups or interviews identified the obstacles to  
7 uptake.  
8

9  
10 Special care was taken to identify studies that appeared in multiple publications.<sup>13</sup> When  
11 more than one report described a specific study and each presented the same data, then the  
12 most recent publication was included for analysis. However, if more than one publication  
13 described a single investigation but each presented novel and complementary evidence then  
14 both were utilised.  
15

### 16 *Data collection and analysis*

17 Reports were retrieved if it appeared likely that they contained data regarding barriers to  
18 uptake of evidence from systematic reviews. The first reviewer reviewed all the citations, and  
19 followed up reference lists, while the retrieved full reports were assessed by at least two  
20 reviewers (JW and BN) for inclusion in the review. Disagreements were resolved by  
21 discussion, or adjudication by a third party (MC). Reports appearing relevant initially, but  
22 which were not, joined a list of excluded studies maintained by the author (JW).  
23  
24

25 Using a data collection form, two reviewers (JW and BN) extracted data from the included  
26 studies. Information extracted from each article included a description of the barriers  
27 identified, the percentage of participants highlighting the barrier, demographics of the  
28 respondents, and the characteristics of the included study. Where possible, we estimated the  
29 percentages of respondents affected by an obstacle as the difference between 100% and the  
30 sum of the percentage with no opinion and those not affected.<sup>6</sup> The data extraction sheet was  
31 created based on a taxonomy of barriers to implementing clinical practice guidelines.<sup>6</sup> The  
32 mechanism of action by which improved patient care is attained is believed to proceed  
33 through a number of stages.<sup>14</sup> Research evidence alters eventual clinical outcome through the  
34 intermediate steps of first changing clinician knowledge, then improving attitudes, and lastly,  
35 changing practitioner behaviour. This taxonomy had been used with success by other  
36 investigators. It is reported to stand up well in comparison with alternative taxonomies.<sup>7</sup>  
37  
38

39 Both reviewers independently read each report and identified evidence relevant to each of the  
40 main outcomes of interest. Barriers were then grouped into themes and the obstacles ordered  
41 according to the number of studies in which they were identified. The themes were organised  
42 into groups depending on whether they impacted on knowledge, attitude, or behaviour.<sup>6</sup> The  
43 categories drew on an ideal mechanism of a knowledge, attitudes, and behaviour  
44 framework.<sup>14</sup> Before a systematic review can affect patient outcome, it first affects  
45 knowledge, then attitudes, and finally, behaviour.  
46  
47

48 Lack of familiarity and awareness, for instance, were listed under the Knowledge heading;  
49 lack of motivation was listed under Attitudes; patient, review and environmental factors were  
50 grouped under the Behaviour heading. Barriers impeding review uptake through a cognitive  
51 component were considered obstacles affecting knowledge. If an affective component was  
52 identified then the barrier was listed as impeding attitude. A limitation or restriction on ability  
53 was regarded as a barrier affecting behaviour. Lack of familiarity included impaired ability to  
54 correctly answer questions about review content, as well as self-acknowledged lack of  
55 familiarity. Lack of awareness was viewed as the inability to adequately acknowledge  
56 systematic review existence.  
57  
58  
59  
60

1  
2  
3  
4 Study characteristics were included in Table 1. Methods were outlined in Table 2; the results  
5 were tabulated in Table 3.  
6

7  
8 In order to assess the quality of the studies, study characteristics were extracted: year of  
9 publication, country of origin, main objective of the study, the design of the study, and the  
10 characteristics of participants. In particular, the sampling strategy of the primary studies,  
11 response rate, and methodological approach, including data collection strategies, were  
12 assessed.  
13

## 14 RESULTS

### 15 *Search yield*

16  
17 Of 19 databases searched and three search engines utilized, there were 1,726 specific  
18 candidate articles found possibly examining barriers to uptake of evidence from systematic  
19 reviews. Some 1,651 titles were excluded after examination of the bibliographic citation.  
20 After examination of the full text of 75 articles, 13 articles fulfilled the criteria. Fifteen  
21 primary studies were detected from the reference lists of these 75 articles. A total of 28  
22 detected reports describing 27 unique studies met inclusion criteria. **Thirteen studies that  
23 might possibly be expected to be included but are not, are outlined in Table 4 together with  
24 the reasons for their exclusion. To be included, studies had to address perceived obstacles to  
25 uptake of evidence specifically from systematic reviews, meta-analyses and the databases that  
26 contained them.** A search of EMBASE and PubMed from January 2011 to June 2012, failed  
27 to detect any relevant, completed or on-going studies to be added to 'Studies awaiting  
28 classification' and 'On-going studies' tables. The search terms and their combination are  
29 outlined in Table 5.  
30  
31  
32

33 The 27 included studies encompassed 2 qualitative studies, and 25 surveys asking a total of  
34 57 questions regarding possible barriers to uptake of evidence from systematic reviews, meta-  
35 analysis, and the databases containing them. A survey involved at least one question to a  
36 group of decisions makers about barriers to uptake of evidence from systematic reviews.  
37 Barriers were grouped into themes: 18 derived from the surveys and an additional 10 from  
38 the qualitative studies.  
39  
40  
41  
42  
43  
44  
45  
46  
47  
48  
49  
50  
51  
52  
53  
54  
55  
56  
57  
58  
59  
60

**Figure 1. PRISMA Flow diagram**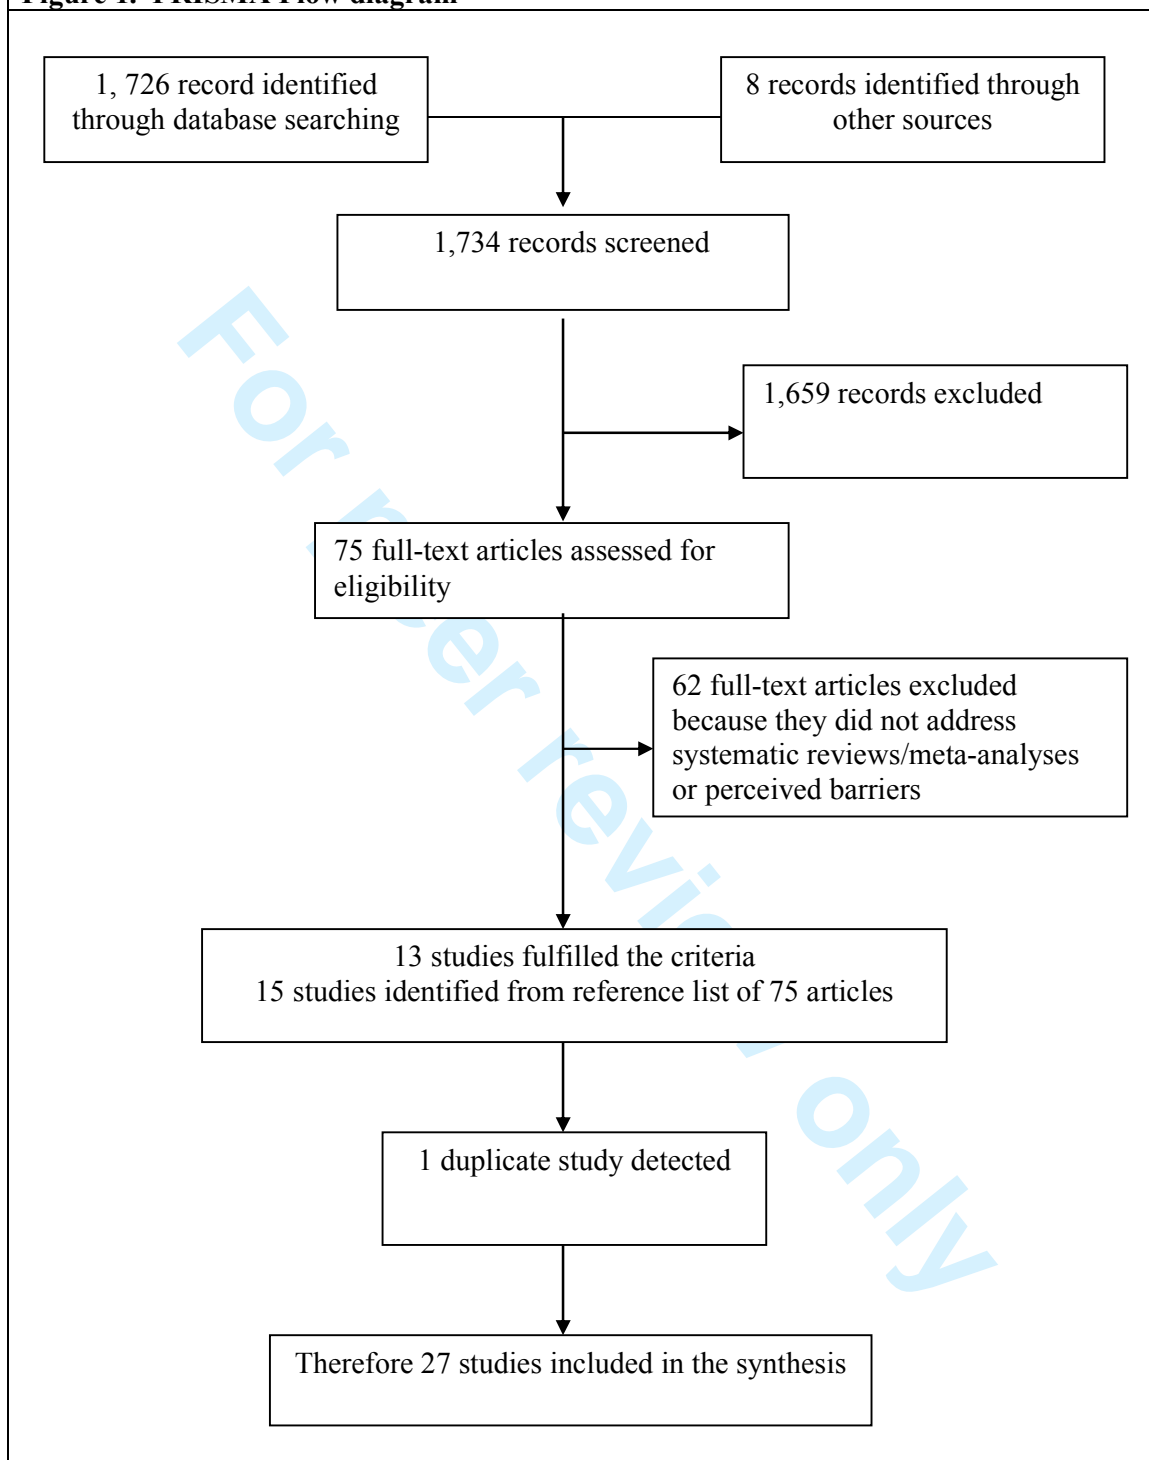

The studies were undertaken in the UK (n=9), Canada (n=5), Australia (n=4), USA (n=3), Ireland (n=1), Holland (n=1), New Zealand (n=1), Switzerland (n=1), India (n=1), and SE Asia: Indonesia, Malaysia, Thailand, the Philippines (n=1). One country, Switzerland, surveyed participants from 78 countries. Therefore, included studies reported data from decision makers in 91 countries.

1  
2  
3  
4 Of 10,218 participants, 64% were physicians (Table 6). Two studies were concerned with the  
5 use of systematic review evidence for public health policy and programme management  
6 decisions.<sup>24, 25</sup> The remaining studies had a clinical practice focus concerned with  
7 investigating attitudes to evidence-based medicine. Seventeen studies (63%) were published  
8 after the year 2000.  
9

### 10 *Study Quality*

11 The included studies were limited in terms of the quality and generalizability of their results.  
12 While all but one<sup>15</sup> had a well-described sampling frame, just eight of the 27 studies describe  
13 selecting a random sample of participants (Table 2). Response rates were not mentioned in  
14 two<sup>16, 25</sup> of the 27 studies (Table 2). The response rate was variable. The rate varied from  
15 8.8% to 100% and 17 of the 27 studies describe a response rate of at least 60% (Table 2).  
16 Twenty-six studies reported the number of participants investigated, with the number varying  
17 from 16 to 1,406.  
18  
19

20  
21 The number of barriers addressed by each survey varied. Of the 25 surveys, 8 (31%)  
22 examined only one type of barrier, and the average number of barriers examined was 1.7.  
23 None of the surveys examined 6 or more barriers and all studies relied on reported use, **not**  
24 **actual use**, of evidence.  
25

### 26 *Characteristics of Studies*

27 Most studies were surveys (n=25), 2 were qualitative studies with one included study using  
28 mixed methods. Data collection strategies included focus groups (n=1), individual interviews  
29 (n=1), together with mail, telephone, and web-based questionnaires (n=25).  
30  
31

32 The characteristics of each study are outlined in Table 1. We found that the surveys used a  
33 heterogeneous variety of decision-making populations, based on location or speciality. They  
34 also investigated a number of resources. The surveys looked at systematic reviews, meta-  
35 analyses, The Cochrane Library, the Cochrane Database of Systematic Reviews (**one of the**  
36 **six high-quality databases maintained by the Library**), Database of Abstracts of Reviews of  
37 **Effects**, the Reproductive Health Library, also the earlier Cochrane Pregnancy and Childbirth  
38 Database and the Oxford Database of Perinatal Trials. The surveys displayed a wide range of  
39 the percentage of respondents reporting each barrier (Table 3).  
40  
41

### 42 *Identifying barriers*

43 **After classifying possible barriers into common themes, it was found that the 57 questions**  
44 **about obstacles to uptake of evidence from systematic reviews encompassed 28 barriers.**  
45 **These were grouped according to the knowledge/attitude/behaviour framework.<sup>14</sup> Barriers**  
46 **affecting knowledge could include lack of awareness, lack of familiarity and a lack of**  
47 **understanding of meta-analyses. Lack of confidence, decreased motivation, a perceived lack**  
48 **of usefulness of systematic reviews and limited trust in them, were grouped under Attitudes.**  
49 **Systematic review attributes, patient issues, and environmental factors have the potential to**  
50 **impair usage of systematic reviews. Attributes of systematic reviews such as academic**  
51 **terminology, and environmental factors such as limited resources or a negative organisational**  
52 **climate, were grouped under Behaviour.**  
53  
54

### 55 *Knowledge*

56 Eleven studies measured lack of awareness as a possible barrier. Sample size ranged from  
57 248 to 8,100 (median, 475) and the response rate ranged from 8.8% to 90% (median, 66%).  
58  
59  
60

1  
2  
3 The percentage of respondents reporting lack of awareness as a barrier was as high as 82%  
4 (for DARE<sup>17</sup>) and as low as 1% (for Cochrane Library<sup>18</sup>) with a median of 55%. In 9 (82%)  
5 of the 11 studies, at least 10% of the respondents cited lack of awareness as a barrier.  
6

7  
8 Seven surveys measured lack of familiarity as a possible barrier. Sample size ranged from 60  
9 to 8,100 (median, 531) and the response rate ranged from 8.8% to 100% (median, 63%). The  
10 percentage of respondents suggesting lack of familiarity as a barrier was as high as 98%  
11 (DARE<sup>17</sup>) and as low as 19% (systematic reviews<sup>17</sup>) with a median of 70%. In 7 (100%) of  
12 the 7 surveys, at least 10% of the respondents cited lack of familiarity as a barrier.  
13

#### 14 *Attitude*

15 Four studies measured lack of motivation as a possible barrier. Sample size ranged from 98 to  
16 8,100 (median, 1,305). The percentage of respondents identifying this barrier was as high as  
17 10% (Oxford Database of Perinatal Trials<sup>21</sup>) and as low as 2% (meta-analysis<sup>22</sup>) with a  
18 median of 3.6%. In none of the surveys did more than 10% of respondents report lack of  
19 motivation as a barrier.  
20

21  
22 Seven surveys measured lack of perceived usefulness as a possible barrier. Sample size  
23 ranged from 60 to 491 (median, 350), and the response rate ranged from 63% to 100%  
24 (median, 87%). The percentage of respondents identifying lack of usefulness as a barrier was  
25 as high as 95% (systematic reviews<sup>17</sup>) and as low as 7% (Cochrane Library<sup>18</sup>) with a median  
26 of 16.5%. In six of the seven surveys, at least 10% of the respondents cited lack of usefulness  
27 as an issue.  
28

#### 29 *Behaviour*

30  
31 Eleven surveys measured lack of access as a possible barrier. Sample size ranged from 60 to  
32 3,087 (median, 440), and the response rate ranged from 44% to 100% (median, 71%). The  
33 percentage of respondents identifying lack of access as a barrier was as high as 95% (lack of  
34 easy access to Cochrane Library<sup>19</sup>) and as low as 3% (lack of access to Cochrane Library<sup>20</sup>),  
35 with a median of 55%. In 10 (91%) of the 11 surveys, at least 10% of the respondents cited  
36 lack of access as a barrier.  
37

38  
39 Five studies investigated 10 external barriers to overview uptake. The external barriers  
40 investigated were environment-related in 5 studies and also systematic review-related in one  
41 study, with no patient-related barriers cited. More than 10% of respondents cited lack of  
42 resources and lack of positive policy climate<sup>23</sup>, lack of workshop attendance<sup>16</sup>, and lack of  
43 training in Cochrane Library use<sup>18, 20</sup> as possible environmental barriers. Lack of time was  
44 not cited by more than 10% of participants.<sup>18</sup> More than 10% of respondents cited the limited  
45 range of topics covered by the Cochrane Library<sup>18</sup> as a possible barrier.  
46

47  
48 Fourteen surveys looked at lack of use of systematic reviews. Sample size ranged from 150 to  
49 8,100 (median, 490) and the response rate ranged from 8.8% to 100% (median, 63%). The  
50 percentage of respondents reporting lack of use was as high as 99% (DARE<sup>17</sup>) and as low as  
51 18% (Cochrane Library<sup>16</sup>) with a median of 78%. In 14 (100%) of the 14 surveys at least  
52 10% of the respondents did not use systematic reviews or the databases containing them.  
53

#### 54 *Qualitative studies*

55 Two qualitative studies<sup>24, 25</sup> cited six important barriers to evidence uptake from systematic  
56 reviews. The two studies emphasised lack of accessibility. They also cited a lack of training  
57 in the purpose and methodology of systematic reviews as a barrier to uptake. Content issues  
58  
59  
60

1  
2  
3 such as lack of relevance, lack of implications for practice, and limited implementation  
4 strategies were also cited. A deficient understanding of the information needs of the target  
5 audience of systematic reviews was also raised as a major barrier.  
6

7  
8 One study had a qualitative element exploring the perceived weaknesses of the Cochrane  
9 Library.<sup>18</sup> Participants suggested as barriers the limited range of topics covered, poor access,  
10 the narrow focus on RCTs and meta-analysis, difficulty of use, lack of regular update, poor  
11 promotion, and the time required to use and search the database. Number of barriers  
12 investigated by each study is tabulated in Table 7.  
13

## 14 **DISCUSSION**

15 While access is improving, The Cochrane Library is still not free in all countries and lack of  
16 access is still seen as a significant barrier. Access, of course, impacts on awareness and  
17 familiarity. While The Cochrane Library has achieved widespread awareness, in the majority  
18 of the studies, more than 10% of participants still cited lack of awareness of systematic  
19 reviews, or the databases that contain them, as a barrier.  
20

21  
22 Casual awareness does not guarantee familiarity with systematic reviews. Lack of familiarity  
23 was more common than lack of awareness.<sup>17</sup> Furthermore, at least 10% of the respondents  
24 cited the lack of usefulness of systematic reviews as a significant obstacle.  
25

26 A negative attitude and a lack of knowledge may inhibit the uptake of systematic reviews.  
27 However, factors related to the review itself, the patient, or wider environmental barriers may  
28 also impair uptake. Limited relevance and a paucity of implications for practice were seen as  
29 barriers<sup>25</sup> together with the limited range of topics covered.<sup>18</sup> More than 10% of respondents  
30 cited lack of a receptive policy climate<sup>23</sup> and lack of training in database searching<sup>20</sup> as  
31 possible environmental barriers.  
32

33  
34 The everyday usage of systematic reviews should improve attitudes to this form of evidence.  
35 However, there is considerable evidence that this is not happening.<sup>17</sup> Surprisingly, lack of  
36 time and motivation did not emerge as major barriers to systematic reviews uptake.  
37

### 38 *Limitations*

39 The extensive and systematic literature search is one of the strengths of this systematic  
40 review. Explicit inclusion criteria and a transparent approach to collecting data were also  
41 utilised. Each included study was assessed by at least two of the authors. The limitations of  
42 our systematic review largely reflect the shortcomings of the reports reviewed.  
43  
44

45 All the 27 included studies, except the two qualitative studies, were surveys using closed-  
46 ended questions. This meant that the obstacles addressed were dependent very much on  
47 investigator preference. A fear of being outside a consensus for instance, was not specifically  
48 investigated as a barrier. Use of a different taxonomy may have altered our findings. But the  
49 taxonomy selected and utilised here compares well to other taxonomies.<sup>26</sup>  
50  
51

52 Because much of the research in the knowledge translation field is poorly indexed in  
53 electronic databases and spread over many disciplines, relevant studies may have been  
54 overlooked, though searching the reference lists of related studies yielded additional reports.  
55

56 Another potential defect is the use of participant self-ratings. The individual studies  
57 depended on the decision maker's perceptions and views. Actual clinical practice was not  
58  
59  
60



1  
2  
3 assessed. Whether an obstacle is real or perceived may affect the strategy required to address  
4 the identified barrier.

5  
6 Some of the included studies were limited with respect to sampling and generalizability.  
7 Some surveys were small and used non-random samples confined to specific groups. This  
8 limits the extent to which the findings can be generalised.<sup>27</sup> A well-described sampling frame  
9 and a good response rate improve our confidence in a study's results.<sup>28</sup> A low response rate  
10 in some of the surveys increases the potential for selection bias. The external validity of the  
11 studies can be questioned as a poor response rate increases the impact of non-responder bias  
12 in the survey results.<sup>29</sup> However, by including a wide range of decision makers in our  
13 systematic review, this increases our appreciation of how differences in health-care systems  
14 can impact on review uptake.

### 17 *Implications*

18 This analysis offers a list of reasons for understanding why decision makers may be  
19 disinclined to use systematic reviews. A number of the barriers already cited by Cabana and  
20 colleagues<sup>6</sup> to guideline adherence were identified, though in our study, time constraints,  
21 **limited motivation and patient related factors were not highlighted.** The results of this review  
22 have a number of implications for systematic review uptake in particular and evidence uptake  
23 in general.

24  
25  
26 Despite the high regard in which systematic reviews and The Cochrane Library are held,  
27 there are a variety of barriers to systematic review uptake. These include lack of access, lack  
28 of awareness, lack of familiarity, lack of perceived usefulness, limited actual use in practice  
29 and finally, a number of external barriers to do with systematic review content, presentation,  
30 and wider organisational factors.

31  
32  
33 Few studies however, consider the full variety of barriers that must be overcome to achieve  
34 enhanced uptake. The average number of barriers examined was 1.7. By not investigating a  
35 full variety of barriers, strategies to improve use are less likely to address all the important  
36 factors inhibiting systematic review uptake and, as a result, are less likely to be successful.<sup>6</sup>  
37 **Interventions designed to change practice should be based on an accurate assessment of the**  
38 **factors that support targeted health outcomes. The accuracy of this assessment is directly**  
39 **related to the future impact of the intervention.<sup>45</sup> If we accept this finding, then it is vital to**  
40 **identify the factors that influence the uptake of evidence from systematic reviews in order to**  
41 **help develop targeted interventions to enhance information uptake from this important**  
42 **resource.<sup>9</sup> Future research needs to address a fuller range of impediments to evidence uptake,**  
43 **with practical difficulties encountered in using systematic reviews observed and documented**  
44 **by researchers through 'user testing' of this source of evidence by participants.<sup>46</sup>**

45  
46  
47 Access to The Cochrane Library is critical in order to advance evidence-based healthcare.<sup>30</sup>  
48 Connectivity seems to have increased<sup>20</sup> but access and use of databases needs to be  
49 improved. Even different professionals working in the same clinical setting can have different  
50 levels of access to the same database, an issue deserving of further investigation.<sup>20</sup> If most of  
51 those who have access to the database then go on to actually use the Cochrane Library then  
52 access may be an important issue to be investigated further. Strategies to assist those least  
53 likely to use Cochrane databases may help the move towards evidence-based practice.<sup>28</sup>

### Conclusion

Much work has been done on the barriers to uptake of evidence from clinical practice guidelines.<sup>6</sup> The barriers that Cabana and colleagues commonly identified to guideline adherence were lack of awareness and familiarity, lack of belief in a good outcome after adopting the guideline, and the inertia of previous practice including lack of motivation.

Lack of motivation to use systematic reviews did not emerge as a major obstacle to systematic review uptake in our study. However, in common with research on the uptake of evidence in general, lack of access and limited awareness continue to be significant perceived barriers to systematic review uptake. Importantly, lack of practical use of systematic reviews continues to present a major challenge to evidence uptake. To become familiar with an innovation, it must be used. For systematic reviews, this is not happening often enough.

Strategies to improve uptake of reviews should emphasize the usefulness of reviews for research and clinical practice. They should also provide a practical opportunity to use and become familiar with systematic reviews and the databases containing them, preferably in an organizational climate that values research.

To our knowledge, this study represents the first systematic review, of a diverse group of decision makers, of barriers to the uptake of evidence from systematic reviews, meta-analyses and their related databases. The results presented here have immediate and practical relevance for clinicians and organisations that are trying to improve access to the best available evidence and enhance its use in routine practice. These findings provide a sound basis on which to plan future interventions to enhance the uptake of evidence from systematic reviews and meta-analyses among physicians and other decision makers, leading to improved care for the individual patient.

### References

1. Innvaer S, Vist G, Trommald M et al. Health policy-makers' perceptions of their use of evidence: a systematic review. *Journal of Health Services Research & Policy* 2002; 7 (4): 239–244.
2. Straus S, Tetroe J, and Graham I. Knowledge to action: what it is and what it isn't. In Straus S, Tetroe J, and Graham I, editors. *Knowledge Translation in Health Care*. UK: Wiley-Blackwell, BMJ Books; 2009.
3. Sackett D, Rosenberg WC, Muir Gray JA, Haynes R B, and Richardson WS. Evidence based medicine: what it is and what it isn't. *BMJ* 1996; 312: 71.
4. Tetzlaff J, Tricco A, and Moher D. Knowledge Synthesis. In Straus S, Tetroe J, Graham I D, editors. *Knowledge translation in health care*. UK: Wiley-Blackwell, BMJ Books; 2009.
5. Bennet NL, Casebeer LL, Zheng S, Kristofco R. Information seeking behaviours and reflective practice. *J Contin Educ Prof* 2006; 26(2):120-7.
6. Cabana M, Rand CS, Powe NR et al. Why don't physicians follow clinical practice guidelines? A framework for improvement. *JAMA* 1999; 282(15):1458-1465.

- 1  
2  
3 7. Gravel, K., Legare, F., Graham, I. Barriers and facilitators to implementing shared  
4 decision-making in clinical practice: a systematic review of health care professionals.  
5 *Implementation science* 2006; 1:16.  
6
- 7  
8 8. Lavis J, Davies H, Oxman A et al. Toward systematic reviews that inform health care  
9 management. *Journal of Health Services Research & Policy* 2005; 10 Suppl 1: 35–48.  
10
- 11 9. Cochrane L J, Olson C A, Murray S et al. Gaps between knowing and doing:  
12 Understanding and assessing the barriers to optimal health care. *Journal of Continuing*  
13 *Education in the Health Professions* 2007; 27: 94–102.  
14
- 15 10. Lavis JN. How can we support the use of systematic reviews in policy making? *PLoS*  
16 *Medicine* 2009;6(11):e1000141.doi:10.137/journal.pmed.1000141  
17
- 18 11. Murthy L, Shepperd S, Clarke M, Garner S, Lavis J, Roberts N W. Interventions to  
19 improve the use of systematic reviews for clinical and commissioning decision-making.  
20 *Cochrane Database of Systematic Reviews* 2011 Issue 10, Art.No.: CD009401, DOI:  
21 10.1002/14651858.CD009401  
22
- 23 12. Dobbins, M, Cockerill, R, Barnsley, J. and Ciliska, D. Factors of the innovation,  
24 organisation, environment, and individual that predict the influence five systematic reviews  
25 had on public health decisions. *International Journal of Technology Assessment in Health*  
26 *Care* 2001;17:4: 467-478.  
27
- 28  
29 13. Lang T. and Secic M. How to report statistics in medicine. Philadelphia: ACP; 2006.  
30
- 31 14. Woolf SH. Practice guidelines: a new reality in medicine, III: impact on patient care.  
32 *Arch Intern Med.* 1993;153: 2646-2655.  
33
- 34 15. Young J. and Ward J. Evidence-based medicine in general practice: beliefs and barriers  
35 among Australian GPs. *Journal of Evaluation in Clinical Practice* 2001; 7 (2): 201-210.  
36
- 37 16. Martis R, Ho J, Crowther C. Survey of knowledge and perception on the access to  
38 evidence-based practice and clinical practice change among maternal and infant health  
39 practitioners in South East Asia. *BMC Pregnancy and Childbirth* 2008; 8:34.  
40
- 41 17. McColl A, Smith H, White P, et al. General practitioner's perceptions of the route to  
42 evidence based medicine: a questionnaire survey. *British Medical Journal* 1998; 316: 361 -  
43 365.  
44
- 45 18. Wilson P, Watt I and Hardman, P. Survey of medical directors' views and use of the  
46 Cochrane Library. *British Journal of Clinical Governance* 2001; 6(1): 34-39.  
47
- 48 19. Wilson P, Droogan J, Glanville J, Watt I, Hardman G. Access to the evidence base from  
49 general practice: a survey of general practice staff in Northern and Yorkshire Region. *Quality*  
50 *in Health Care* 2001;10:83–89.  
51
- 52 20. Wilson P, Glanville J, Watt I. Access to the online evidence base in general practice: a  
53 survey of the Northern and Yorkshire Region. *Health Information and Libraries Journal*  
54 2003;20:172-178.  
55  
56  
57  
58  
59  
60

- 1
- 2
- 3
- 4 21. Paterson-Brown S, Fisk N, Wyatt J. Uptake of meta-analytical overviews of effective
- 5 care in English obstetric units. *Journal of Obstetrics and Gynaecology* 1995; 102: 297-301.
- 6
- 7 22. Sur R, Scales Jr C, Preminger G, Dahm P. Evidence-based medicine: a survey of
- 8 american urological association members. *Journal of Urology* 2006; 176: 1127-1134.
- 9
- 10 23. Ciliska D, Hayward S, Dobbins M, Brunton G, Underwood J. Transferring public-health
- 11 nursing research to health-system planning: assessing the relevance and accessibility of
- 12 systematic reviews. *Canadian Journal of Nursing Research* 1999; 31(1): 23-36.
- 13
- 14 24. Dobbins M, DeCorby K, and Twiddy T. A knowledge transfer strategy for public health
- 15 decision makers. *Worldviews on Evidence-Based Nursing* 2004; 1(2): 120-128.
- 16
- 17 25. Dobbins M, Jack S, Thomas H, Kothari A. Public health decision-makers'
- 18 informational needs and preferences for receiving information. *Worldviews on Evidence-*
- 19 *based Nursing* 2007; 4(3): 156-163.
- 20
- 21 26. Espeland A, Baerheim A. Factors affecting general practitioners' decisions about plain
- 22 radiography for back pain: implications for classification of guideline barriers – a qualitative
- 23 study. *BMC Health Serv Res* 2003; 3:8.
- 24
- 25 27. Bennett S, Tooth L, McKenna K, Rodger S, Strong J, Ziviani J, et al. Perceptions of
- 26 evidence-based practice: a survey of Australian occupational therapists. *Australian*
- 27 *Occupational Therapy Journal* 2003;50, 13-22.
- 28
- 29 28. Kerse N, Arroll B, Lloyd T, Young J, Ward J. Evidence databases, the Internet, and
- 30 general practitioners: the New Zealand story. 2001; *N Z Med J* 114;1127:89-91.
- 31
- 32 29. Dahm P, Poolman R, Bhandari M et al. 2009. Perceptions and Competence in Evidence-
- 33 Based Medicine: A Survey of the American Urological Association Membership. *Journal of*
- 34 *Urology* 2009; 18 (2): 767-77.
- 35
- 36 30. Young, J. and Ward, J. General practitioner's use of evidence databases. *MJA*. 1999;170:
- 37 56-58.
- 38
- 39 31. Grol R, Grimshaw J. Evidence-based implementation of evidence-based medicine. *Jt*
- 40 *Comm J Qual Improv* 1999 Oct; 25(10):503-13.
- 41
- 42 32. Melnyk B, Fineout-Overholt E, Feinstein N et al. Nurses' Perceived Knowledge, Beliefs
- 43 Skills and Needs Regarding Evidence-Based Practice: Implications for accelerating the
- 44 paradigm shift. *Worldviews on Evidence-based Nursing* 2004; 1(3): 185-93.
- 45
- 46 33. Prescott K, Lloyd M, Douglas H-R, Haines A, Humphrey C, Rosenthal J and Watt I.
- 47 Promoting clinically effective practice: general practitioners' awareness of sources of
- 48 research evidence. *Family Practice* 1997; 14:320-323.
- 49
- 50 34. Jordans C, Hawe P, Irwig L et al. Use of systematic reviews of randomized trials by
- 51 Australian neonatologists and obstetricians. *MJA* 1998;168: 267-270.
- 52
- 53
- 54
- 55
- 56
- 57
- 58
- 59
- 60

- 1  
2  
3 35. Olatunbosun, O, Edouard L, Pierson R A. Physician's attitudes toward evidence-based  
4 obstetric practice: a questionnaire survey. *BMJ* 1998 Jan; 316:31.  
5  
6 36. Gavvani V. and Mohan V. Physicians' Attitude towards Evidence-Based Medical  
7 Practice and Health Science Library Services. *LIBRES Library and Information Science*  
8 *Research Electronic Journal* 2008;18 (1).  
9  
10 37. Hanson B, Bhandari M, Audige L, Helfet D. The need for education in evidence-based  
11 orthopaedics. *Acta Orthop Scand* 2004;75 (3):328-332.  
12  
13 38. Poolman R, Sierevelt I, Farrokhyar F et al. Perceptions and competence in evidence-  
14 based medicine: are surgeons getting better? *J Bone Joint Surg Am* 2007;89:206-215.  
15  
16 39. McAlister FA, Graham I, Karr G, Laupacis A. Evidence-based medicine and the  
17 practicing clinician. *J Gen Intern Med* 1999;14:236-242.  
18  
19 40. McCaw B, McGlade K, McElnay J. The impact of the internet on the practice of general  
20 practitioners and community pharmacists in Northern Ireland. *Informatics in primary care*  
21 2007;15:231-7.  
22  
23 41. Carey S, Hall D. Psychiatrists' views of evidence-based practice. *Psychiatric Bulletin*  
24 1999; 23:159-161.  
25  
26 42. Lawrie SM, Scott AIF, Sharpe MC. Evidence-based psychiatry – Do psychiatrists want it  
27 and can they do it? *Health Bulletin* 2000 Jan;58:1.  
28  
29 43. Ciliska D, Hayward S, Dobbins M, Brunton G, Underwood J. Transferring public health  
30 nursing research to health service planning: assessing the relevance and accessibility of  
31 systematic reviews. *Can J Nurs Research* 1999; 31(1):23-36.  
32  
33 44. Hyde C. Who uses the Cochrane Pregnancy and Childbirth Database? *BMJ* 1995;  
34 29:310.  
35  
36 45. Bloom BS. Effects of continuing medical education on improving physician clinical care  
37 and patient health: a review of systematic reviews. *Int J Technol Assess Health Care* 2005;  
38 21(3):380-5.  
39  
40 46. Rosenbaum S, Glenton C, Cracknell J. User experiences of evidence-based online  
41 resources for health professionals: User testing of The Cochrane Library. *BMC Medical*  
42 *Informatics and Decision Making* 2008 8; 34.

### Competing interests

All authors declare that they have no conflicting interests.

All authors have completed the Unified Competing Interest form and declare: no support from any organisation for the submitted work; no financial relationships with any organisations that might have an interest in the submitted work in the previous three years, no other relationships or activities that could appear to have influenced the submitted work.

The Corresponding Author has the right to grant on behalf of all authors and does grant on behalf of all authors, an exclusive licence (or non-exclusive for government employees) on a worldwide basis to the BMJ Publishing Group Ltd and its Licensees to permit this article (if accepted) to be published in BMJ editions and any other BMJPG products and sublicences to exploit all subsidiary rights, as set out in our licence

**Table 1 Characteristics of included studies**

| Year Published, Country                                                                     | Objective                                                                                                   | Design and focus                                                          | Participants                                               | Date Conducted |
|---------------------------------------------------------------------------------------------|-------------------------------------------------------------------------------------------------------------|---------------------------------------------------------------------------|------------------------------------------------------------|----------------|
| 1.<br>Wilson, P.<br>Watt, I.<br>and<br>Hardman, P.<br>2001 <sup>18</sup><br>UK              | To determine attitudes on the importance of effectiveness information                                       | Postal questionnaire<br><b>Cochrane Library</b>                           | 338<br>Medical directors                                   | 1999           |
| 2.<br>Paterson<br>-Brown<br>et al.<br>1995 <sup>21</sup><br>UK                              | To establish the availability of meta-analytic overviews and to find out how obstetricians keep up to date. | Telephone survey<br><b>Oxford Database of Perinatal Trials</b>            | 98<br>Obstetricians                                        | 1993           |
| 3.<br>Hanson,<br>Bhandari,<br>Audige, .<br>and Helfet,<br>2004 <sup>37</sup><br>Switzerland | To determine current understanding of study methodology and critical appraisal.                             | Questionnaire, self-administered<br><b>Meta-analysis</b>                  | 532<br>Surgeons and allied professionals from 78 countries | 2002           |
| 4.<br>Poolman<br>et al.<br>2007 <sup>38</sup><br>Holland                                    | They examined perceptions and competence in EBM                                                             | Postal survey<br><b>Meta-analysis Systematic reviews Cochrane Library</b> | 366<br>Orthopedic Surgeons                                 | 2005           |
| 5.<br>Sur<br>et al.<br>2005 <sup>22</sup><br>USA                                            | Investigated the attitudes of urologists toward EBM                                                         | Web-based survey<br><b>Cochrane Database of Systematic Reviews</b>        | 714<br>Urologists                                          | 2005           |
| 6.<br>Dahn                                                                                  | To investigate the                                                                                          | Mail survey                                                               | 889                                                        | 2006           |



|                                                                                                                                                                                                                                                                                                                                                             |                                                                |                                                                                    |                                                                                                  |                                                    |           |
|-------------------------------------------------------------------------------------------------------------------------------------------------------------------------------------------------------------------------------------------------------------------------------------------------------------------------------------------------------------|----------------------------------------------------------------|------------------------------------------------------------------------------------|--------------------------------------------------------------------------------------------------|----------------------------------------------------|-----------|
| 1<br>2<br>3<br>4<br>5<br>6<br>7<br>8<br>9<br>10<br>11<br>12<br>13<br>14<br>15<br>16<br>17<br>18<br>19<br>20<br>21<br>22<br>23<br>24<br>25<br>26<br>27<br>28<br>29<br>30<br>31<br>32<br>33<br>34<br>35<br>36<br>37<br>38<br>39<br>40<br>41<br>42<br>43<br>44<br>45<br>46<br>47<br>48<br>49<br>50<br>51<br>52<br>53<br>54<br>55<br>56<br>57<br>58<br>59<br>60 | et al.<br>2009 <sup>29</sup><br>USA                            | attitudes of urologists<br>to EBM                                                  | Meta-analyses<br>CDSRs                                                                           | Urologists                                         |           |
| 7.                                                                                                                                                                                                                                                                                                                                                          | McAlister<br>et al.<br>1999 <sup>39</sup><br>Canada            | To assess the<br>attitudes of<br>general internists<br>to EBM.                     | Postal Survey<br>Cochrane Database<br>of Systematic Reviews                                      | 294<br>Physicians                                  | 1997      |
| 8.                                                                                                                                                                                                                                                                                                                                                          | Wilson<br>et al.<br>2001 <sup>19</sup><br>UK                   | To identify current<br>methods of making<br>research evidence<br>accessible        | Postal survey<br>Cochrane Library                                                                | 1406<br>General<br>practitioners                   | 1999      |
| 9.                                                                                                                                                                                                                                                                                                                                                          | Young, J<br>and<br>Ward, J.<br>2001 <sup>15</sup><br>Australia | Examine<br>views<br>about<br>EBM                                                   | Postal Survey and<br>Semi-structured<br>Interviews<br>Cochrane Library                           | 60<br>GPs                                          | 1999      |
| 10.                                                                                                                                                                                                                                                                                                                                                         | McCaw<br>et al.<br>2007 <sup>40</sup><br>Ireland               | Gain an insight<br>into the use of<br>Internet                                     | Postal survey<br>Cochrane Library                                                                | 542<br>Community<br>pharmacists (178)<br>GPs (364) | 2005      |
| 11.                                                                                                                                                                                                                                                                                                                                                         | Kerse, N<br>et al.<br>2001 <sup>28</sup><br>NZ                 | Access to<br>Internet<br>and<br>Cochrane<br>Library                                | Cross-sectional<br>postal and fax<br>survey<br>Cochrane Library                                  | 381<br>GPs                                         | 1999-2000 |
| 12.                                                                                                                                                                                                                                                                                                                                                         | McColl<br>et al.<br>1998 <sup>17</sup><br>UK                   | To determine the<br>attitude to EBM<br>and perceived<br>usefulness of<br>databases | Postal questionnaire<br>Systematic reviews<br>Meta-analysis<br>Cochrane Library<br>CDSRs<br>DARE | 302<br>GP principals                               | 1997      |
| 13.                                                                                                                                                                                                                                                                                                                                                         | Bennett<br>et al.<br>2003 <sup>27</sup>                        | To find out about<br>attitudes to EBP<br>and implementation                        | Postal questionnaire<br>Cochrane Library                                                         | 649<br>Occupational<br>Therapists                  | 2000      |

|    |                    |                          |                                |                       |      |
|----|--------------------|--------------------------|--------------------------------|-----------------------|------|
| 1  | Australia          | barriers                 |                                |                       |      |
| 2  |                    |                          |                                |                       |      |
| 3  |                    |                          |                                |                       |      |
| 4  |                    |                          |                                |                       |      |
| 5  | <b>14.</b>         |                          |                                |                       |      |
| 6  | Young              | To determine awareness   | Postal                         | 311                   | 1997 |
| 7  | and Ward           | and use of the Cochrane  | Questionnaire                  | General practitioners |      |
| 8  | 1999 <sup>30</sup> | Library and access       | <b>Cochrane Library</b>        |                       |      |
| 9  | Australia          | to the                   |                                |                       |      |
| 10 |                    | Internet                 |                                |                       |      |
| 11 |                    |                          |                                |                       |      |
| 12 |                    |                          |                                |                       |      |
| 13 | <b>15.</b>         |                          |                                |                       |      |
| 14 | Prescott           | To establish the         | Self-administered,             | 800                   | 1996 |
| 15 | et al.             | awareness of             | postal questionnaire           | GPs                   |      |
| 16 | 1997 <sup>33</sup> | research evidence        | survey                         |                       |      |
| 17 | UK                 |                          | <b>CDSRs</b>                   |                       |      |
| 18 |                    |                          |                                |                       |      |
| 19 |                    |                          |                                |                       |      |
| 20 | <b>16.</b>         |                          |                                |                       |      |
| 21 | Jordans            | To determine the         | Cross-sectional                | 224                   | 1995 |
| 22 | et al.             | proportion who           | telephone survey               | neonatologists        |      |
| 23 | 1998 <sup>34</sup> | report using             | obstetricians                  |                       |      |
| 24 | Australia          | systematic reviews       | <b>Systematic reviews</b>      |                       |      |
| 25 |                    |                          |                                |                       |      |
| 26 |                    |                          |                                |                       |      |
| 27 | <b>17.</b>         |                          |                                |                       |      |
| 28 | Ciliska,           | To gain an               | Telephone                      | 226                   | NK   |
| 29 | et al.             | understanding of         | questionnaire                  | decision makers       |      |
| 30 | 1999 <sup>43</sup> | research needs,          | survey                         | in public health      |      |
| 31 | Canada             | perceptions of barriers  | <b>Systematic reviews</b>      | Included doctors      |      |
| 32 |                    | to research utilisation, |                                |                       |      |
| 33 |                    | and attitudes towards    |                                |                       |      |
| 34 |                    | systematic reviews       |                                |                       |      |
| 35 |                    |                          |                                |                       |      |
| 36 |                    |                          |                                |                       |      |
| 37 | <b>18.</b>         |                          |                                |                       |      |
| 38 | Olatunbosun        | To examine               | Self-administered,             | 190 physicians        | 1996 |
| 39 | et al.             | views of                 | two-page                       | in obstetric practice |      |
| 40 | 1998 <sup>35</sup> | EBM                      | questionnaire                  |                       |      |
| 41 | Canada             |                          | <b>Cochrane Library</b>        |                       |      |
| 42 |                    |                          | <b>Cochrane Pregnancy</b>      |                       |      |
| 43 |                    |                          | <b>And Childbirth Database</b> |                       |      |
| 44 |                    |                          |                                |                       |      |
| 45 | <b>19.</b>         |                          |                                |                       |      |
| 46 | Melnyk             | Describe major           | Limited survey                 | 160 nurses            | 2003 |
| 47 | et al.             | barriers                 | <b>CDSRs</b>                   |                       |      |
| 48 | 2004 <sup>32</sup> | and facilitators         |                                |                       |      |
| 49 | USA                | to EBP.                  |                                |                       |      |
| 50 |                    |                          |                                |                       |      |
| 51 |                    |                          |                                |                       |      |
| 52 | <b>20.</b>         |                          |                                |                       |      |
| 53 | Gavani, V.         | Directed at              | Survey method                  | 98                    | 2008 |
| 54 | and Mohan,         | exploring attitudes      | <b>Cochrane Library</b>        | physicians            |      |
| 55 | 2008 <sup>36</sup> | towards                  | <b>CDSRs</b>                   |                       |      |
| 56 | India.             | EBM                      |                                |                       |      |
| 57 |                    |                          |                                |                       |      |
| 58 | <b>21.</b>         |                          |                                |                       |      |
| 59 |                    |                          |                                |                       |      |
| 60 |                    |                          |                                |                       |      |

|                                                          |                                                           |                                                                                              |                                                                   |                                                           |            |
|----------------------------------------------------------|-----------------------------------------------------------|----------------------------------------------------------------------------------------------|-------------------------------------------------------------------|-----------------------------------------------------------|------------|
| 1<br>2<br>3<br>4<br>5<br>6<br>7<br>8<br>9<br>10          | Wilson,<br>et al.<br>2003 <sup>20</sup><br>UK             | To assess the awareness and use of NHSnet                                                    | Postal survey questionnaire<br>Cochrane Library                   | 1364<br>GPs: 441<br>Nurses: 325<br>Practice Managers: 556 | 2001       |
| 11<br>12<br>13<br>14<br>15<br>16<br>17                   | 22.<br>Carey,<br>et al.<br>1999 <sup>41</sup><br>UK       | To determine the attitudes of towards the practice of EBM                                    | Postal questionnaire<br>Cochrane Library                          | 139<br>Psychiatrists                                      | 1998       |
| 18<br>19<br>20<br>21<br>22<br>23<br>24                   | 23.<br>Lawrie<br>et al.<br>2000 <sup>42</sup><br>UK       | To examine attitudes to evidence - based psychiatry                                          | Survey, postal<br>CDSRs                                           | 93<br>Senior psychiatrists                                | NK         |
| 25<br>26<br>27<br>28<br>29<br>30<br>31<br>32<br>33       | 24.<br>Hyde<br>et al.<br>1995 <sup>44</sup><br>UK         | To examine use of Cochrane Pregnancy and Childbirth Database                                 | Postal survey<br>CPCD<br>Cochrane Library                         | 274 subscribers to CPCD<br>Included doctors               | 1994       |
| 34<br>35<br>36<br>37<br>38<br>39<br>40<br>41<br>42       | 25.<br>Martis<br>et al.<br>2008 <sup>16</sup><br>Asia     | The aim was to assess current knowledge of evidence-based practice                           | Survey, postal<br>Reproductive Health Library<br>Cochrane Library | 660 health care professionals<br>Included doctors         | 2005       |
| 43<br>44<br>45<br>46<br>47<br>48<br>49<br>50<br>51<br>52 | 26.<br>Dobbins,<br>et al.<br>2007 <sup>25</sup><br>Canada | The purpose was to identify preferences for the transfer and exchange of research knowledge. | Semi-structured interviews<br>Systematic reviews                  | 16 Policy decision-makers<br>Included a doctor            | 2001       |
| 53<br>54<br>55<br>56<br>57<br>58<br>59<br>60             | 27.<br>Dobbins,<br>et al.<br>2004 <sup>24</sup><br>Canada | To discover public health decision makers' preferences for content,                          | One-hour focus groups<br>Systematic reviews                       | 46<br>Policy makers<br>Included doctors                   | 2002- 2003 |

format, and channels for  
receiving research knowledge

**Table 2 Methods and Quality**

| Study                                                           | Sample frame                                                                 | Response rate       | Measurement of use of evidence |
|-----------------------------------------------------------------|------------------------------------------------------------------------------|---------------------|--------------------------------|
| <b>1.</b><br>Wilson<br>et<br>al.<br>2001 <sup>18</sup>          | Purposive<br>sample of<br>491 Medical directors<br>Well-described<br>sample  | (69%)<br>338/491    | Reported use                   |
| <b>2.</b><br>Paterson<br>-Brown<br>et al.<br>1995 <sup>21</sup> | Purposive<br>sample of<br>98 obstetricians<br>Well-described<br>sample       | (100%)<br>98/98     | Reported<br>use                |
| <b>3.</b><br>Hanson<br>et<br>al.<br>2004 <sup>37</sup>          | Purposive<br>sample of<br>1,064 surgeons/others<br>Well-described<br>sample  | (50%)<br>532/1,064  | Reported<br>use                |
| <b>4.</b><br>Poolman<br>et<br>al.<br>2007 <sup>38</sup>         | Purposive<br>sample of<br>611 orthopaedic surgeons<br>Well-described         | (60%)<br>366/611    | Reported<br>use                |
| <b>5.</b><br>Sur<br>et<br>al.<br>2006 <sup>22</sup>             | Purposive<br>sample of<br>8,100 urologists<br>Well-described<br>sample frame | (8.8%)<br>714/8,100 | Reported use                   |
| <b>6.</b><br>Dahm<br>et<br>al.<br>2009 <sup>29</sup>            | Random<br>sample of<br>2000 urologists<br>Well-described<br>sample frame     | (45%)<br>889/2000   | Reported use                   |
| <b>7.</b><br>McAlister<br>et<br>al.                             | Purposive<br>sample<br>of 294                                                | (59%)<br>294/521    | Reported use                   |

|                                                          |                                                                                                            |                      |              |
|----------------------------------------------------------|------------------------------------------------------------------------------------------------------------|----------------------|--------------|
| 1999 <sup>39</sup>                                       | general<br>Physicians.<br>Well-described<br>sample frame                                                   |                      |              |
| <b>8.</b><br>Wilson<br>et<br>al.<br>2001 <sup>18</sup>   | Purposive<br>sample of<br>3,087 individuals<br>Well-described<br>sample frame<br>Primary care              | (45%)<br>1,406/3,087 | Reported use |
| <b>9.</b><br>Young,<br>and<br>Ward<br>2001 <sup>15</sup> | Sample of,<br>60 GPs<br>Sampling frame<br>not described                                                    | (100%)<br>60/60      | Reported use |
| <b>10.</b><br>McCaw<br>et<br>al.<br>2007 <sup>40</sup>   | Sample of<br>1081 GPs and<br>522 pharmacists<br>Well-described<br>sample frame                             | (34%)<br>542/1603    | Reported use |
| <b>11.</b><br>Kerse<br>et al.<br>2001 <sup>28</sup>      | Random<br>Sample<br>of 459 GPs<br>Well-described<br>sample frame                                           | (83%)<br>381/459     | Reported use |
| <b>12.</b><br>McColl<br>et al.<br>1998 <sup>17</sup>     | Random<br>Sample of<br>452 GPs<br>Well-described<br>sample frame                                           | (63%)<br>302/452     | Reported use |
| <b>13.</b><br>Bennett<br>et<br>al.<br>2003 <sup>27</sup> | Proportional<br>random sample<br>of 1491<br>occupational<br>therapists<br>Well-described<br>sampling frame | (44%)<br>649/1491    | Reported use |

|                                       |                                                                                                                   |                    |              |
|---------------------------------------|-------------------------------------------------------------------------------------------------------------------|--------------------|--------------|
| 14.                                   | Random sample of 428 GPs<br>Well-described sampling frame                                                         | (73%)<br>311/428   | Reported use |
| Young and Ward, 1999 <sup>30</sup>    |                                                                                                                   |                    |              |
| 15.                                   | Random sample of 800 GPs                                                                                          | (62%)<br>501/800   | Reported use |
| Prescott et al. 1997 <sup>33</sup>    |                                                                                                                   |                    |              |
| 16.                                   | Well-described sample frame<br>Random sample of 145 Obstetricians and 104 neonatologists<br>Well described Sample | (90%)<br>224/248   | Reported use |
| Jordans et al. 1998 <sup>34</sup>     |                                                                                                                   |                    |              |
| 17.                                   | 277 who met inclusion criteria of decision makers<br>Well-described sample                                        | (87%)<br>242/277   | Reported use |
| Ciliska et al. 1999 <sup>43</sup>     |                                                                                                                   |                    |              |
| 18.                                   | Random sample of 190 family physicians and obstetricians<br>Well-described sample                                 | (76%)<br>148/190   | Reported use |
| Olatunbosun et al. 1998 <sup>35</sup> |                                                                                                                   |                    |              |
| 19.                                   | 'Convenient' sample<br>Well described sample                                                                      | (100%)<br>160/1600 | Reported use |
| Melnyk et al. 2004 <sup>32</sup>      |                                                                                                                   |                    |              |
| 20.                                   | Random sample<br>Well-described sample                                                                            | (65%)<br>98/150    | Reported use |
| Gavvani And Mohan, 2008 <sup>36</sup> |                                                                                                                   |                    |              |



|                                                                                                                                                                                                                            |                                                           |                                                               |                                                                        |              |
|----------------------------------------------------------------------------------------------------------------------------------------------------------------------------------------------------------------------------|-----------------------------------------------------------|---------------------------------------------------------------|------------------------------------------------------------------------|--------------|
| 1<br>2<br>3<br>4<br>5<br>6<br>7<br>8<br>9<br>10                                                                                                                                                                            | <b>21.</b><br>Wilson<br>et<br>al.<br>2003 <sup>20</sup>   | All GPs in<br>defined area.<br>Well-described<br>sample       | (44%)<br>1364/3090                                                     | Reported use |
| 11<br>12<br>13<br>14<br>15<br>16<br>17                                                                                                                                                                                     | <b>22.</b><br>Carey<br>and<br>Hall,<br>1999 <sup>41</sup> | All psychiatrists<br>in a defined area<br>Well-defined sample | (64%)<br>139/216                                                       | Reported use |
| 18<br>19<br>20<br>21<br>22<br>23                                                                                                                                                                                           | <b>23.</b><br>Lawrie<br>et<br>al.<br>2000 <sup>42</sup>   | All in a<br>defined area<br>Well-described<br>sample          | (76%)<br>93/123<br>but just 22/123 (17%)<br>contributed to this review | Reported use |
| 24<br>25<br>26<br>27<br>28<br>29<br>30<br>31<br>32<br>33<br>34<br>35<br>36<br>37<br>38<br>39<br>40<br>41<br>42<br>43<br>44<br>45<br>46<br>47<br>48<br>49<br>50<br>51<br>52<br>53<br>54<br>55<br>56<br>57<br>58<br>59<br>60 | <b>24.</b><br>Hyde<br>et<br>al.<br>1995 <sup>44</sup>     | All subscribers<br>to CPCD<br>Well-described<br>sample        | 71%<br>274/387                                                         | Reported use |
|                                                                                                                                                                                                                            | <b>25.</b><br>Martis<br>et<br>al.<br>2008 <sup>16</sup>   | All in a<br>defined area<br>Well-described<br>sample          | NK                                                                     | Reported use |
|                                                                                                                                                                                                                            | <b>26.</b><br>Dobbins<br>et<br>al.<br>2004 <sup>24</sup>  | Purposeful<br>sample<br>Well-described<br>sample              | 46/60 (77%)                                                            | Reported use |
|                                                                                                                                                                                                                            | <b>27.</b><br>Dobbins<br>et<br>al.<br>2007 <sup>25</sup>  | Purposeful<br>sample<br>Well-described<br>sample              | 16/NK                                                                  | Reported use |

**Table 3. Barrier Descriptive Findings**

| Barrier category            | Barrier Descriptive                                                                                                                                                                                                                                                                                                                                                                                                                                                                                                                                                                                      |
|-----------------------------|----------------------------------------------------------------------------------------------------------------------------------------------------------------------------------------------------------------------------------------------------------------------------------------------------------------------------------------------------------------------------------------------------------------------------------------------------------------------------------------------------------------------------------------------------------------------------------------------------------|
| <i>Knowledge barriers</i>   | Eleven studies measured lack of awareness as a possible barrier. The percentage of respondents reporting lack of awareness as a barrier was as high as 82% and as low as 1%, with a median of 55%. Eleven surveys measured lack of access as a possible barrier. The percentage of respondents identifying lack of access as a barrier was as high as 95% and as low as 3%, with a median of 55%. Seven surveys measured lack of familiarity as a possible barrier. The percentage of respondents suggesting lack of familiarity as a barrier was as high as 98 and as low as 19%, with a median of 70%. |
| <i>Attitudinal barriers</i> | Seven surveys measured lack of perceived usefulness as a possible barrier. The percentage of respondents identifying lack of usefulness as a barrier was as high as 95% and as low as 7%, with a median of 16.5%. Four studies measured lack of motivation as a possible barrier. The percentage of respondents identifying this barrier was as high as 10% and as low as 2% with a median of 3.6%.                                                                                                                                                                                                      |
| <i>Behaviour barriers</i>   | Five studies investigated 10 external barriers to review uptake. More than 10% of respondents cited lack of resources, lack of positive policy climate, lack of workshop attendance, and lack of training as possible environmental barriers. Fourteen surveys looked at lack of use of systematic reviews. The percentage of respondents reporting lack of use was as high as 99% and as low as 18% with a median of 78%.                                                                                                                                                                               |

**Table 4. Excluded studies**

|                                                                                                                                                                                                                                                                                                 |
|-------------------------------------------------------------------------------------------------------------------------------------------------------------------------------------------------------------------------------------------------------------------------------------------------|
| Lavis, John. Research, Public Policymaking and Knowledge-translation Processes. <i>Journal of Continuing Education in the Health Professions</i> . 2006 26. 37-45. Not a survey, focus group or interview, or an intervention.                                                                  |
| Glasziou P, Guyatt GH, Dans AL, Straus S, Sackett DL. Applying the results of trials and systematic reviews to individual patients. <i>Evidence-Based Medicine</i> 1998 3(6). 165-6. Not a survey, focus group or interview study, or an intervention.                                          |
| Grimshaw J, Santesso N, Cumston M, Mayhew A, McGowen J. Knowledge for knowledge translation: the role of the Cochrane Collaboration <i>HLWIK</i> 2006 26(1): 55-62. Not a survey, focus group or interview study, or an intervention.                                                           |
| Lavis J, Davies H, Gruen R, Walshe K, Farquhar CM. Working within and beyond the Cochrane Collaboration to make systematic reviews more useful to healthcare managers and policy makers. <i>Health Policy</i> 2006(2): 21-33. Not a survey, focus group or interview study, or an intervention. |
| Dobbins M, Ciliska D, Cockerill R, Barnsley J, DiCenso A. A framework for the dissemination and utilisation of research for healthcare policy and practice. <i>J Know Synth Nurs</i> 2002 18;9:7. Not a survey, focus group or interview study, or an intervention.                             |

Petticrew M, Whitehead M, Macintyre SJ, Graham H, Egan M. Evidence for public health policies on inequalities. *Journal of Epidemiological Community Health*. 2004 58:811-6. Not specifically related to systematic reviews.

Silagy CA, Weller DP, Middleton PF and Doust JA. General practitioners' use of evidence databases. *Med J Aust*. 1999 April 19;170(8):393  
A comment on previous studies.

Sheldon T. Making evidence synthesis more useful for management and policy making. *J Health Serv Res Policy*. 2005 Vol 10, Suppl 1, July  
An essay, not a survey, focus group, or an interview, or an intervention.

Gruen R, Morris P, McDonald E and Bailie. Making systematic reviews more useful for policy makers. *Bulletin of the World Health Organization*. 2005 June, 83(6). A letter/essay.

Melnyk B, Fineout-Overholt E, Feinstein N, Sadler L, Hernandez C. Nurse Practitioner Educators' Perceived Knowledge, Beliefs and Teaching Strategies Regarding Evidence-Based Practice: Implications for Accelerating the Integration of Evidence-based Practice into Graduate Programmes. *Journal of Professional Nursing*, 2008 Vol 24, Issue 1, p 7-13. Does not address systematic reviews.

Volmink J, Siegfried N, Robertson K and Gulmezoglu M. Research Synthesis and Dissemination as a Bridge to Knowledge Management: the Cochrane Collaboration. *Bulletin of the World Health Organization* 2004 82: 778-783. An essay. Not a survey, a focus group, an interview, or an intervention.

Mayer J and Pitman L. The Attitudes of Australian GPs to Evidence-based Medicine: a Focus Group Study. *Family Practice* 1999 16: 627-632. Does not address systematic reviews.

Cranney M and Walley T. Same information, different decisions: the influence of evidence on the management of hypertension in the elderly. *The British Journal of General Practice* 1996 46(412): 661-663. Not specifically about systematic reviews.

#### Table 5. Search of PubMed and Embase

PubMed was searched from December 2010 to June 2012 using the advanced search facility

| Search | Query                                                               | Items found |
|--------|---------------------------------------------------------------------|-------------|
| 1      | systematic review AND barriers AND knowledge uptake                 | 1           |
| 2      | meta-analysis AND barriers AND knowledge uptake                     | 1           |
| 3      | systematic review AND obstacles AND knowledge uptake                | 1           |
| 4      | meta-analysis AND obstacles AND knowledge uptake                    | 0           |
| 5      | systematic review AND barriers AND knowledge utilisation            | 3           |
| 6      | meta-analysis AND barriers and knowledge utilisation                | 2           |
| 7      | systematic review AND obstacles AND knowledge utilisation           | 0           |
| 8      | meta-analysis AND obstacle AND knowledge utilisation                | 0           |
| 9      | overview* OR review* AND impairment* AND knowledge translation      | 13          |
| 10     | systematic review* OR meta-analys* AND barrier* AND decision making | 16          |

**37 citations were returned, none of which met inclusion criteria**

**Embase** was searched from December 2010 to June 2012 using the advanced search facility

| <b>Search</b> | <b>Query</b>                                                               | <b>Items found</b> |
|---------------|----------------------------------------------------------------------------|--------------------|
| <b>1</b>      | <b>systematic review AND barriers AND knowledge uptake</b>                 | <b>14</b>          |
| <b>2</b>      | <b>meta-analysis AND barriers AND knowledge uptake</b>                     | <b>5</b>           |
| <b>3</b>      | <b>systematic review AND obstacles AND knowledge uptake</b>                | <b>0</b>           |
| <b>4</b>      | <b>meta-analysis AND obstacles AND knowledge uptake</b>                    | <b>0</b>           |
| <b>5</b>      | <b>systematic review AND barriers AND knowledge utilisation</b>            | <b>14</b>          |
| <b>6</b>      | <b>meta-analysis AND barriers and knowledge utilisation</b>                | <b>0</b>           |
| <b>7</b>      | <b>systematic review AND obstacles AND knowledge utilisation</b>           | <b>0</b>           |
| <b>8</b>      | <b>meta-analysis AND obstacle AND knowledge utilisation</b>                | <b>0</b>           |
| <b>9</b>      | <b>overview* OR review* AND impairment* AND knowledge translation</b>      | <b>0</b>           |
| <b>10</b>     | <b>systematic review* OR meta-analys* AND barrier* AND decision making</b> | <b>0</b>           |

**32 citations were returned, 1 full text article retrieved, no report met inclusion criteria**

**Table 6. Disciplines participating**

Doctors: 6,549  
 Nurses: 1,494  
 Practice managers: 785  
 Occupational therapists: 649  
 Midwives: 202  
 Pharmacists: 178  
 General practice staff: 91  
 Surgical allied professions: 69  
 Policy makers: 62  
 Information specialists: 56  
 Others: 83

**Total: 10,218**

**TABLE 7: Number of barriers investigated by each study to uptake of evidence from systematic reviews, meta-analyses, and the databases containing them**

| <b>Surveys</b>               | <b>Number of barriers addressed by each study</b> |
|------------------------------|---------------------------------------------------|
| Wilson et al. (2001)         | 4: lack of access, awareness, use, and training   |
| Paterson-Brown et al. (1995) | 2: lack of access, awareness                      |
| Hanson et al. (2004)         | 2: lack of trust, training                        |
| Poolman et al. (2007)        | 2: lack of understanding, use                     |
| Sur et al. (2006)            | 3: Lack of awareness, use, and understanding      |
| Dahm et al. (2009)           | 3: Lack of awareness, use, and understanding,     |
| McAlister et al. (1999)      | 1: Lack of use                                    |
| Wilson et al. (2001)         | 1: Lack of access                                 |

|                             |                                                                                                                               |
|-----------------------------|-------------------------------------------------------------------------------------------------------------------------------|
| Ward and Young (2001)       | 3: Lack of access, understanding, usefulness,                                                                                 |
| McCaw et al. (2007)         | 1: Lack of use                                                                                                                |
| Kerse et al. (2001)         | 3: Lack of access, awareness, use                                                                                             |
| McCull et al. (1998)        | 3: Lack of awareness, access, and understanding                                                                               |
| Bennett et al. (2001)       | 1: Lack of confidence                                                                                                         |
| Young and Ward (1999)       | 3: Lack of awareness, access, use                                                                                             |
| Paterson-Brown (1993)       | 3: Lack of awareness, availability, and need                                                                                  |
| Prescott et al. (1999)      | 2: Lack of use, awareness                                                                                                     |
| Jordan et al. (1999)        | 3: Lack of use, awareness, access                                                                                             |
| Ciliska et al. (1999)       | 4: Lack of awareness, use, policy climate, resources                                                                          |
| Olatunbosun et al. (1998)   | 1: Lack of access                                                                                                             |
| Melnyk et al. (2004)        | 1: Lack of use                                                                                                                |
| Gavagni et al. (2008)       | 2: Lack of use, usefulness                                                                                                    |
| Wilson et al. (2003)        | 4: Lack of access, awareness, use, and training                                                                               |
| Carey and Hall, (1999)      | 1: Access                                                                                                                     |
| Lawrie et al. (2000)        | 1: Ability to search                                                                                                          |
| Hyde et al. (1995)          | 1: Ability to search                                                                                                          |
| Martis et al. (2008)        | 5: Lack of access, awareness, use, usefulness, training,                                                                      |
| <b>Qualitative studies:</b> |                                                                                                                               |
| Dobbins et al. (2004)       | 2: Lack of access, training                                                                                                   |
| Dobbins et al. (2007)       | 4: Lack of relevance, implications, implementation strategies, understanding of the information needs of the target audience. |
| Wilson et al. (2001)        | 7. Limited range, access, focus, use, up-datedness, promotion and time                                                        |

## PROTOCOL

### Barriers to uptake of evidence from systematic reviews and meta-analyses: a systematic review of decision makers' perceptions

**Authors:** John Wallace, Bosah Nwosu, and Mike Clarke

#### Abstract

This is the protocol for a systematic review. The objectives are as follows:

1. To review all studies identifying barriers to uptake of evidence from systematic reviews, meta-analyses and the databases associated with them.
2. To assess the methodological quality of these studies.
3. To perform a systematic review of the evidence in this area.

#### Background

The slow and haphazard process of translating research findings into clinical practice compromises the potential benefits of clinical research. The need for effective knowledge transfer in clinical practice is essential. However, to date, there is a consensus among the research community that most efforts in knowledge translation at a clinical level have met with little success.<sup>1</sup>

1  
2  
3 A systematic review is a review of a clearly formulated question that uses systematic and  
4 explicit methods to identify, select and critically appraise relevant research, and to collect and  
5 analyse data from studies that are included in the review.<sup>2</sup> The increased uptake of evidence  
6 from systematic reviews is advocated because of their potential to improve the quality of  
7 decision making for patient care. Systematic reviews can do this by decreasing inappropriate  
8 clinical variation and quickly expediting the application of current, effective advances to  
9 everyday practice. However, research suggests that evidence from systematic reviews has not  
10 been widely adopted by health professionals. Increasing uptake of systematic reviews and  
11 improving awareness of the advantages that the technique can bring to the field of healthcare  
12 is a major challenge.  
13

14  
15 Barriers are factors that limit or restrict uptake of research evidence in clinical practice.<sup>3</sup>  
16 Implementation researchers, educators, policy makers, and clinicians want to know the  
17 identity of barriers to knowledge use in healthcare contexts and also how to address them.  
18 There are specific challenges associated with the assessment of barriers. Many lessons have  
19 been learned from previous research in this area on how to address barriers to knowledge use.  
20 Cabana and colleagues identified a variety of barriers to physician adherence to clinical  
21 practice guidelines and they organised the barriers in terms of their impact on knowledge,  
22 attitudes, and physician behaviour.<sup>3</sup>  
23

24  
25 **Context:** Despite wide promulgation, systematic reviews have had limited effect on changing  
26 decision makers' behaviour. Little is known about the process and factors inhibiting the  
27 uptake of knowledge in response to exposure to a systematic review.  
28

29  
30 **Objective:** To identify barriers to evidence uptake from systematic reviews, meta-analyses,  
31 and their associated databases.  
32

### 33 **Search methods for identification of studies**

34 The Cochrane Library, Medline, Embase, PsycInfo, and other electronic resources, nineteen  
35 in total, will be searched, with a special emphasis on grey literature and knowledge  
36 translation research. The reference lists from primary studies identified will be searched and  
37 also the references from related overviews. The reviewers will identify additional candidate  
38 articles by reviewing the bibliographies of articles retrieved from the search. Experts in the  
39 field will be contacted. Terms to be used will include systematic reviews, overviews, meta-  
40 analysis, and reviews. Other search terms utilised will be barriers, obstacles, impairments,  
41 knowledge translation, knowledge uptake, knowledge utilisation, and decision making.  
42  
43

### 44 **Data collection and analysis**

45 Articles will be included that examined at least one barrier to knowledge uptake from  
46 systematic reviews, meta-analyses, or the databases that contain them. A barrier will be  
47 defined as any factor that limits or restricts complete knowledge uptake from an overview. It  
48 is proposed to focus on barriers that could be changed by an intervention rather than age or  
49 gender. Respondents can identify barriers via responses to survey questions. For qualitative  
50 studies, major themes from focus groups or interviews could also identify barriers. All  
51 decision makers will be included.  
52  
53

54 One investigator (JW) will screen titles and abstracts, and full bibliographic citations to  
55 identify candidate articles. Two investigators (JW and BN) will then independently review  
56 the full text to exclude articles that will not meet the inclusion criteria. Differences will be  
57 resolved by discussion and consensus.  
58  
59  
60



**Data Extraction:**

Data extraction will follow three steps. Firstly, two investigators will abstract the following information from each article: description of the barrier, the percentage of respondents describing the barrier, demographics of the respondents, and also study characteristics including sample size and response rate. Differences will be resolved by discussion and consensus. Secondly, the barriers will be grouped into common themes. Thirdly, the barriers will be organised into groups based on the knowledge, attitudes, behaviour framework.<sup>4</sup> Before an integrative review can affect patient outcomes, it must first affect health professional knowledge, then attitudes, and finally behaviour. Factors impacting on cognition, affect and behaviour will be considered as potential barriers. A survey will be defined as having at least one question to a group about potential barriers to knowledge uptake from a systematic review, a meta-analysis, or the databases containing them.

**Assessment of risk of bias**

Important flaws in individual studies such as a lack of random selection of participants, inadequate description of the sample frame, and a poor response rate will be described. For purposes of quality assessment, study characteristics will be extracted by two investigators: country of origin, year of publication, main objective of the study, design of the study, characteristics of participants, sampling strategy, response rate, and methodological approach, including data collection strategies. Differences in assessment of risk of bias will be resolved by consensus or consultation with a third party (MC). Publication bias will be minimised by the extensive search strategy.

**Synthesis**

We intend to bring together findings from different study designs within different methods and approaches. It is not expected that it will be possible to carry out a meta-analysis due to the high degree of anticipated heterogeneity across settings, participants, and data collection methods. A narrative synthesis with appropriate tabulation is anticipated.

The type of barrier will be tabulated, together with the comprehensiveness of surveys. How often surveys considered the full variety of barriers to knowledge uptake will be indicated. The number and characteristics of the surveys examining each barrier will be documented. The targeted populations and their location will be identified. The sample size, method of selection, and response rate will also be reported. The percentage of respondents identifying a particular barrier will also be listed. Tables will be completed outlining the study characteristics, methods and results.

Evidence synthesis is a process of combining evidence from individual studies to create a new understanding by comparing and analysing concepts and findings from different sources of evidence with a focus on the same topic of interest. The aim is to identify and extract evidence, categorise the evidence, and combine the categories to develop synthesized findings. The overall objective is to build an explanation of why people do not use knowledge from systematic reviews.

Excluded studies will be listed in a 'Characteristics of excluded studies' table with a succinct summary of why studies were excluded. On-going studies and studies awaiting classification if found will be listed.

1  
2  
3 A summary of the main results will be reported together with an assessment of the overall  
4 completeness and applicability of the evidence, together with key methodological limitations.  
5

6 **Aim:** We are interested in improving the relevance and utility of systematic reviews. The aim  
7 of the review outlined here is to identify barriers to uptake of evidence from systematic  
8 reviews and meta-analyses. The objective is also to offer a differential diagnosis for why  
9 decision makers do not use knowledge from systematic reviews as well as providing a  
10 rational strategy aimed at improving knowledge uptake from this important source of pre-  
11 appraised, integrated evidence, together with a frame work for future research.  
12  
13

#### 14 **Potential conflict of interest**

15 None known  
16

#### 17 **Sources of support**

18 No internal or external sources of support supplied  
19

#### 20 **Contact address**

21 Dr John Wallace,  
22 Rewley House,  
23 1 Wellington Square,  
24 University of Oxford,  
25 Oxford OX1 2JA, UK  
26  
27  
28  
29

#### 30 **REFERENCES**

- 31  
32 1. Grimshaw JM, Thomas RE, MacLennan G, Fraser C, Ramsay CR, Vale L, et al.  
33 Effectiveness and efficiency of guideline dissemination and implementation  
34 strategies. *Health Technol Assess* 2004;8(6).  
35  
36 2. Sackett D, Rosenberg WC, Muir Gray JA, Haynes R B, and Richardson WS.  
37 Evidence based medicine: what it is and what it isn't. *BMJ* 1996; 312: 71.  
38  
39 3. Cabana M, Rand CS, Powe NR, Wu AW, Wilson MH, Abboud PAC, Rubin HR.  
40 Why don't physicians follow clinical practice guidelines? A framework for  
41 improvement. *JAMA* 1999; 282(15):1458-1465.  
42  
43 4. Woolf SH. Practice guidelines: a new reality in medicine, III: impact on patient care.  
44 *Arch Intern Med.* 1993;153: 2646-2655.  
45  
46  
47  
48  
49  
50  
51  
52  
53  
54  
55  
56  
57  
58  
59  
60

**FULL LIST OF EXCLUDED STUDIES, SUPPLEMENTARY FILE**

- 1  
2  
3  
4  
5  
6  
7  
8  
9  
10 BERO, L. A., GRILLI, R., GRIMSHAW, J. M., HARVEY, E., OXMAN, A. D. & THOMSON,  
11 M. A. 1998. Closing the gap between research and practice: an overview of systematic  
12 reviews of interventions to promote the implementation of research findings. The  
13 Cochrane Effective Practice and Organization of Care Review Group. *BMJ*, 317, 465-8.
- 14 BROWNER, W. S., BARON, R. B., SOLKOWITZ, S., ADLER, L. J. & GULLION, D. S. 1994.  
15 Physician management of hypercholesterolemia. A randomized trial of continuing  
16 medical education. *West J Med*, 161, 572-8.
- 17 BRUNTON, G. 2003. *Children and physical activity : a systematic review of barriers and*  
18 *facilitators*, London, EPPI-Centre.
- 19 CABANA, M. D., RAND, C. S., POWE, N. R., WU, A. W., WILSON, M. H., ABBOUD, P. A.  
20 & RUBIN, H. R. 1999. Why don't physicians follow clinical practice guidelines? A  
21 framework for improvement. *JAMA*, 282, 1458-65.
- 22 CHAILLET, N., DUBÉ, E., DUGAS, M., AUDIBERT, F., TOURIGNY, C., FRASER, W. D. &  
23 DUMONT, A. 2006. Evidence-based strategies for implementing guidelines in obstetrics:  
24 a systematic review. *Obstet Gynecol*, 108, 1234-45.
- 25 COCHRANE, L. J., OLSON, C. A., MURRAY, S., DUPUIS, M., TOOMAN, T. & HAYES, S.  
26 2007. Gaps between knowing and doing: understanding and assessing the barriers to  
27 optimal health care. *J Contin Educ Health Prof*, 27, 94-102.
- 28 COPPUS, S. F., EMPARANZA, J. I., HADLEY, J., KULIER, R., WEINBRENNER, S.,  
29 ARVANITIS, T. N., BURLS, A., CABELLO, J. B., DECSI, T., HORVATH, A. R.,  
30 KACZOR, M., ZANREI, G., PIERER, K., STAWIARZ, K., KUNZ, R., MOL, B. W. &  
31 KHAN, K. S. 2007. A clinically integrated curriculum in evidence-based medicine for  
32 just-in-time learning through on-the-job training: the EU-EBM project. *BMC Med Educ*,  
33 7, 46.
- 34 CRANNEY, M. & WALLEY, T. 1996. Same information, different decisions: the influence of  
35 evidence on the management of hypertension in the elderly. *Br J Gen Pract*, 46, 661-3.
- 36 DAVIS, D. A. & TAYLOR-VAISEY, A. 1997. Translating guidelines into practice. A  
37 systematic review of theoretic concepts, practical experience and research evidence in the  
38 adoption of clinical practice guidelines. *CMAJ*, 157, 408-16.
- 39 DAVIS, J., CHRYSAFIDOU, E., ZAMORA, J., DAVIES, D., KHAN, K. &  
40 COOMARASAMY, A. 2007. Computer-based teaching is as good as face to face  
41 lecture-based teaching of evidence based medicine: a randomised controlled trial. *BMC*  
42 *Med Educ*, 7, 23.
- 43 DAWES, M. & SAMPSON, U. 2003. Knowledge management in clinical practice: a systematic  
44 review of information seeking behavior in physicians. *Int J Med Inform*, 71, 9-15.
- 45 DOBBINS, M., CILISKA, D., COCKERILL, R., BARNSLEY, J. & DICENSO, A. 2002. A  
46 framework for the dissemination and utilization of research for health-care policy and  
47 practice. *Online J Knowl Synth Nurs*, 9, 7.
- 48 EASTWOOD, G. M., O'CONNELL, B. & GARDNER, A. 2008. Selecting the right integration  
49 of research into practice strategy. *J Nurs Care Qual*, 23, 258-65.
- 50 EGGER, M., SMITH, G. D. & ALTMAN, D. G. *Systematic reviews in health care :*  
51  
52  
53  
54  
55  
56  
57  
58  
59  
60

- 1  
2  
3 *meta-analysis in context*, London : BMJ Books, 2001 (2003 [printing]).
- 4 ESPELAND, A. & BAERHEIM, A. 2003. Factors affecting general practitioners' decisions  
5 about plain radiography for back pain: implications for classification of guideline  
6 barriers--a qualitative study. *BMC Health Serv Res*, 3, 8.
- 7  
8 GAGNON, M. L. 2011. Moving knowledge to action through dissemination and exchange.  
9 *Journal of Clinical Epidemiology*, 64, 25-31.
- 10 GEDDES, J. R. & HARRISON, P. J. 1997. Closing the gap between research and practice. *Br J*  
11 *Psychiatry*, 171, 220-5.
- 12 GLASZIOU, P., GUYATT, G. H., DANS, A. L., DANS, L. F., STRAUS, S. & SACKETT, D.  
13 L. 1998. Applying the results of trials and systematic reviews to individual patients. *ACP*  
14 *J Club*, 129, A15-6.
- 15  
16 GRANT, J., COTTRELL, R., CLUZEAU, F. & FAWCETT, G. 2000. Evaluating "payback" on  
17 biomedical research from papers cited in clinical guidelines: applied bibliometric study.  
18 *BMJ*, 320, 1107-11.
- 19  
20 GREENHALGH, T. & PEACOCK, R. 2005. Effectiveness and efficiency of search methods in  
21 systematic reviews of complex evidence: audit of primary sources. *BMJ*, 331, 1064-5.
- 22 GRILLI, R. & LOMAS, J. 1994. Evaluating the message: the relationship between compliance  
23 rate and the subject of a practice guideline. *Med Care*, 32, 202-13.
- 24 GRIMSHAW, J. M., SANTESSO, N., CUMPSTON, M., MAYHEW, A. & MCGOWAN, J.  
25 2006. Knowledge for knowledge translation: the role of the Cochrane Collaboration. *J*  
26 *Contin Educ Health Prof*, 26, 55-62.
- 27  
28 GRIMSHAW, J. M., SHIRAN, L., THOMAS, R., MOWATT, G., FRASER, C., BERO, L.,  
29 GRILLI, R., HARVEY, E., OXMAN, A. & O'BRIEN, M. A. 2001. Changing provider  
30 behavior: an overview of systematic reviews of interventions. *Med Care*, 39, I12-45.
- 31 GROL, R. & GRIMSHAW, J. 1999. Evidence-based implementation of evidence-based  
32 medicine. *Jt Comm J Qual Improv*, 25, 503-13.
- 33  
34 GRUEN, R. L., MORRIS, P. S., MCDONALD, E. L. & BAILIE, R. S. 2005. Making systematic  
35 reviews more useful for policy-makers. *Bull World Health Organ*, 83, 480.
- 36 HARDEN, A. REES, J. SHEPHERD, G., BRUNTON, S., OLIVER OA. 2001 Young people and  
37 mental health: a systematic review of barriers and facilitators. London:EPPI-Centre,  
38 Social Science Research Centre.
- 39  
40 HARDEN, A., BRUNTON, G., FLETCHER, A. & OAKLEY, A. 2009. Teenage pregnancy and  
41 social disadvantage: systematic review integrating controlled trials and qualitative  
42 studies. *BMJ*, 339, b4254.
- 43  
44 HARDEN, A., GARCIA, J., OLIVER, S., REES, R., SHEPHERD, J., BRUNTON, G. &  
45 OAKLEY, A. 2004. Applying systematic review methods to studies of people's views: an  
46 example from public health research. *J Epidemiol Community Health*, 58, 794-800.
- 47 HIGGINS, J. & GREEN, S. P. 2008. *Cochrane handbook for systematic reviews of interventions*,  
48 Oxford, Wiley-Blackwell.
- 49  
50 TETZLAFF, J. TRICO, A. & MOHOR, D. 2009. Knowledge Synthesis. In: Straus, S. Tetroe J.  
51 & Graham ID (eds.) *Knowledge Translation in Health Care*. UK: BMJ Books.
- 52 DEEKs, J. HIGGINS, J. ALTMAN, D. 2008. Analysing data and undertaking meta-analysis. In:  
53 HIGGINS, J. & GREEN, S. (eds.) *Cochrane Handbook of Systematic Reviews of*  
54 *Interventions*. Chichester (UK): John Wiley and Sons.
- 55  
56 LAVIS, J., DAVIES, H., OXMAN, A., DENIS, J. L., GOLDEN-BIDDLE, K. & FERLIE, E.  
57 2005. Towards systematic reviews that inform health care management and  
58  
59  
60

- 1  
2  
3 policy-making. *J Health Serv Res Policy*, 10 Suppl 1, 35-48.
- 4 LAVIS, J. N. 2006. Research, public policymaking, and knowledge-translation processes:  
5 Canadian efforts to build bridges. *J Contin Educ Health Prof*, 26, 37-45.
- 6  
7 LAVIS, J. N., DAVIES, H. T., GRUEN, R. L., WALSHE, K. & FARQUHAR, C. M. 2006.  
8 Working within and beyond the Cochrane Collaboration to make systematic reviews  
9 more useful to healthcare managers and policy makers. *Healthc Policy*, 1, 21-33.
- 10 LAWRIE, S. M., SCOTT, A. I. & SHARPE, M. C. 2000. Evidence-based psychiatry--do  
11 psychiatrists want it and can they do it? *Health Bull (Edinb)*, 58, 25-33.
- 12 LIBERATI, A., ALTMAN, D. G., TETZLAFF, J., MULROW, C., GÖTZSCHE, P. C.,  
13 IOANNIDIS, J. P., CLARKE, M., DEVEREAUX, P. J., KLEIJNEN, J. & MOHER, D.  
14 2009. The PRISMA statement for reporting systematic reviews and meta-analyses of  
15 studies that evaluate healthcare interventions: explanation and elaboration. *BMJ*, 339,  
16 b2700.
- 17  
18  
19  
20  
21  
22  
23  
24  
25  
26  
27  
28  
29  
30  
31  
32  
33  
34  
35  
36  
37  
38  
39  
40  
41  
42  
43  
44  
45  
46  
47  
48  
49  
50  
51  
52  
53  
54  
55  
56  
57  
58  
59  
60
- MAYER, J. & PITERMAN, L. 1999. The attitudes of Australian GPs to evidence-based  
medicine: a focus group study. *Fam Pract*, 16, 627-32.
- MCALISTER, F. A., GRAHAM, I., KARR, G. W. & LAUPACIS, A. 1999. Evidence-based  
medicine and the practicing clinician. *J Gen Intern Med*, 14, 236-42.
- MELNYK, B. M., FINEOUT-OVERHOLT, E., FEINSTEIN, N. F., SADLER, L. S. &  
GREEN-HERNANDEZ, C. 2008. Nurse practitioner educators' perceived knowledge,  
beliefs, and teaching strategies regarding evidence-based practice: implications for  
accelerating the integration of evidence-based practice into graduate programs. *J Prof  
Nurs*, 24, 7-13.
- MOHER, D., COOK, D. J., EASTWOOD, S., OLKIN, I., RENNIE, D. & STROUP, D. F. 1999.  
Improving the quality of reports of meta-analyses of randomised controlled trials: the  
QUOROM statement. Quality of Reporting of Meta-analyses. *Lancet*, 354, 1896-900.
- MOHER, D., LIBERATI, A., TETZLAFF, J., ALTMAN, D. G. & GROUP, P. 2009. Preferred  
reporting items for systematic reviews and meta-analyses: the PRISMA statement. *J Clin  
Epidemiol*, 62, 1006-12.
- OERMANN, M. H., ROOP, J. C., NORDSTROM, C. K., GALVIN, E. A. & FLOYD, J. A.  
2007. Effectiveness of an intervention for disseminating Cochrane reviews to nurses.  
*Medsurg Nurs*, 16, 373-7.
- OXMAN, A. D., THOMSON, M. A., DAVIS, D. A. & HAYNES, R. B. 1995. No magic bullets:  
a systematic review of 102 trials of interventions to improve professional practice. *CMAJ*,  
153, 1423-31.
- PETTICREW, M., WHITEHEAD, M., MACINTYRE, S. J., GRAHAM, H. & EGAN, M. 2004.  
Evidence for public health policy on inequalities: 1: the reality according to  
policymakers. *J Epidemiol Community Health*, 58, 811-6.
- REES, R., HARDEN, A., SHEPHERD, J., BRUNTON, G & OAKLEY, O. 2001. Young  
people and physical activity: a systematic review of barriers and facilitators.  
London:EPPI-Centre: Social Science Research Centre.
- REES, R., KAVANAGH, J., HARDEN, A., SHEPHERD, J., BRUNTON, G., OLIVER, S. &  
OAKLEY, A. 2006. Young people and physical activity: a systematic review matching  
their views to effective interventions. *Health Educ Res*, 21, 806-25.
- SCALES, CD., VOILS, CI., FESPERMAN, SF., SUR, RL., KUBLER, H., PREMINGER, GM.,  
DAHM, P. 2008 Barriers to the practice of evidence-based urology. *J Uro*,  
179(6):2345-9.



- 1  
2  
3 SHELDON, T. A. 2005. Making evidence synthesis more useful for management and  
4 policy-making. *J Health Serv Res Policy*, 10 Suppl 1, 1-5.
- 5 SHEPHERD, J., HARDEN, A., REES, R., BRUNTON, G., GARCIA, J., OLIVER, S. &  
6 OAKLEY, A. 2006. Young people and healthy eating: a systematic review of research on  
7 barriers and facilitators. *Health Educ Res*, 21, 239-57.
- 8  
9 SILAGY, C. A., STEAD, L. F. & LANCASTER, T. 2001. Use of systematic reviews in clinical  
10 practice guidelines: case study of smoking cessation. *BMJ*, 323, 833-6.
- 11 SILAGY, C. A., WELLER, D. P., MIDDLETON, P. F. & DOUST, J. A. 1999. General  
12 practitioners' use of evidence databases. *Med J Aust*, 170, 393.
- 13  
14 SIMPSON, F. & DOIG, G. S. 2007. The relative effectiveness of practice change interventions  
15 in overcoming common barriers to change: a survey of 14 hospitals with experience  
16 implementing evidence-based guidelines. *J Eval Clin Pract*, 13, 709-15.
- 17  
18 STEINMAN, M. A., RANJI, S. R., SHOJANIA, K. G. & GONZALES, R. 2006. Improving  
19 antibiotic selection: a systematic review and quantitative analysis of quality improvement  
20 strategies. *Med Care*, 44, 617-28.
- 21  
22 STRAUS, S. E., TETROE, J. & GRAHAM, I. D. 2009. *Knowledge translation in health care :  
23 moving from evidence to practice*, Chichester, Wiley-Blackwell.
- 24  
25 THOMAS, J., HARDEN, A., OAKLEY, A., OLIVER, S., SUTCLIFFE, K., REES, R.,  
26 BRUNTON, G. & KAVANAGH, J. 2004. Integrating qualitative research with trials in  
27 systematic reviews. *BMJ*, 328, 1010-2.
- 28  
29 TRICCO, A. C., STRAUS, S. E. & MOHER, D. 2011a. How can we improve the interpretation  
30 of systematic reviews? *BMC Med*, 9, 31.
- 31  
32 TRICCO, A. C., TETZLAFF, J. & MOHER, D. 2011b. The art and science of knowledge  
33 synthesis. *J Clin Epidemiol*, 64, 11-20.
- 34  
35 TUGWELL, P., ROBINSON, V., GRIMSHAW, J. & SANTESSO, N. 2006. Systematic reviews  
36 and knowledge translation. *Bull World Health Organ*, 84, 643-51.
- 37  
38 VOLMINK, J., SIEGFRIED, N., ROBERTSON, K. & GÜLMEZOĞLU, A. M. 2004. Research  
39 synthesis and dissemination as a bridge to knowledge management: the Cochrane  
40 Collaboration. *Bull World Health Organ*, 82, 778-83.
- 41  
42 WYATT, J. C., PATERSON-BROWN, S., JOHANSON, R., ALTMAN, D. G., BRADBURN,  
43 M. J. & FISK, N. M. 1998. Randomised trial of educational visits to enhance use of  
44 systematic reviews in 25 obstetric units. *BMJ*, 317, 1041-6.
- 45  
46 YOUSEFI-NOORAIE, R., RASHIDIAN, A., NEDJAT, S., MAJDZADEH, R.,  
47 MORTAZ-HEDJRI, S., ETEMADI, A. & SALMASIAN, H. 2009. Promoting  
48 development and use of systematic reviews in a developing country. *J Eval Clin Pract*,  
49 15, 1029-34.
- 50  
51  
52  
53  
54  
55  
56  
57  
58  
59  
60
